# Supplementary material for: Processes regulating progressive nitrogen limitation under elevated carbon dioxide: a meta-analysis
Source: Copernicus journal article supplement (doi:10.5194/bg-13-2689-2016), 2016-05-10
Supplement: Supplementary file 1 [file bg-13-2689-2016-supplement.zip]

## Supporting Information

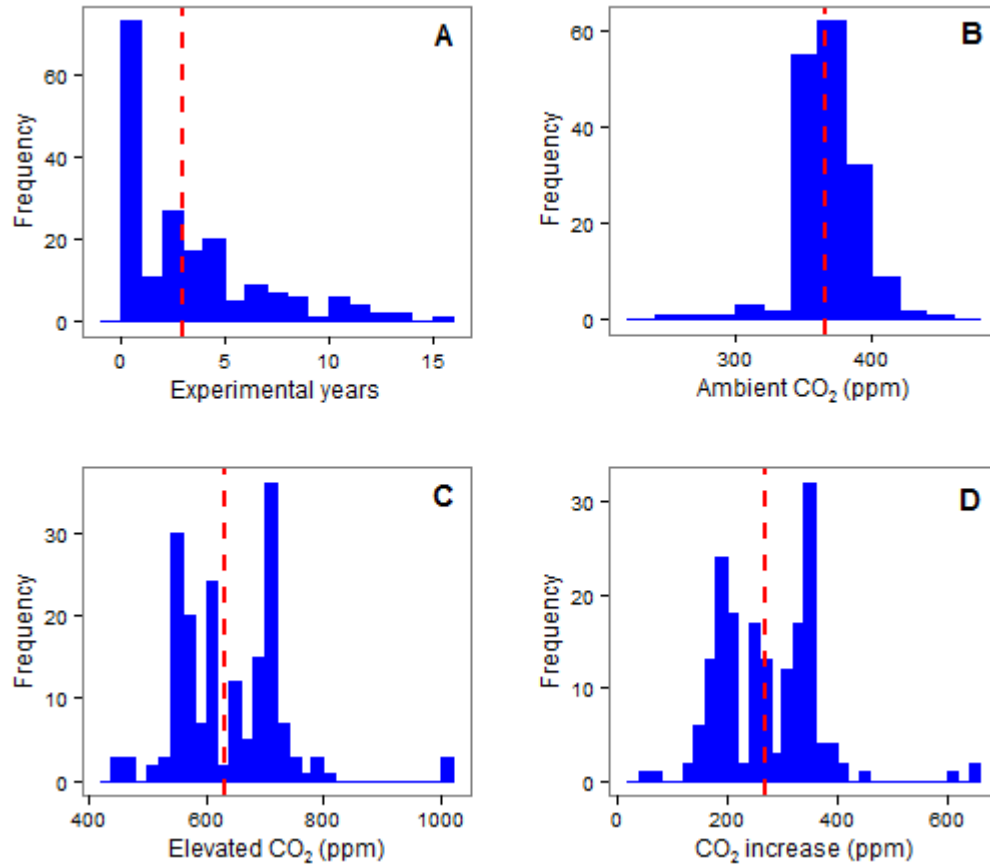

**Fig. S1.** Distributions of the experimental duration (**A**) and the CO<sub>2</sub> concentrations under ambient (**B**) and elevated (**C**) treatments and their difference (**D**) for the 175 collected studies. Red dashed lines represent the mean values.

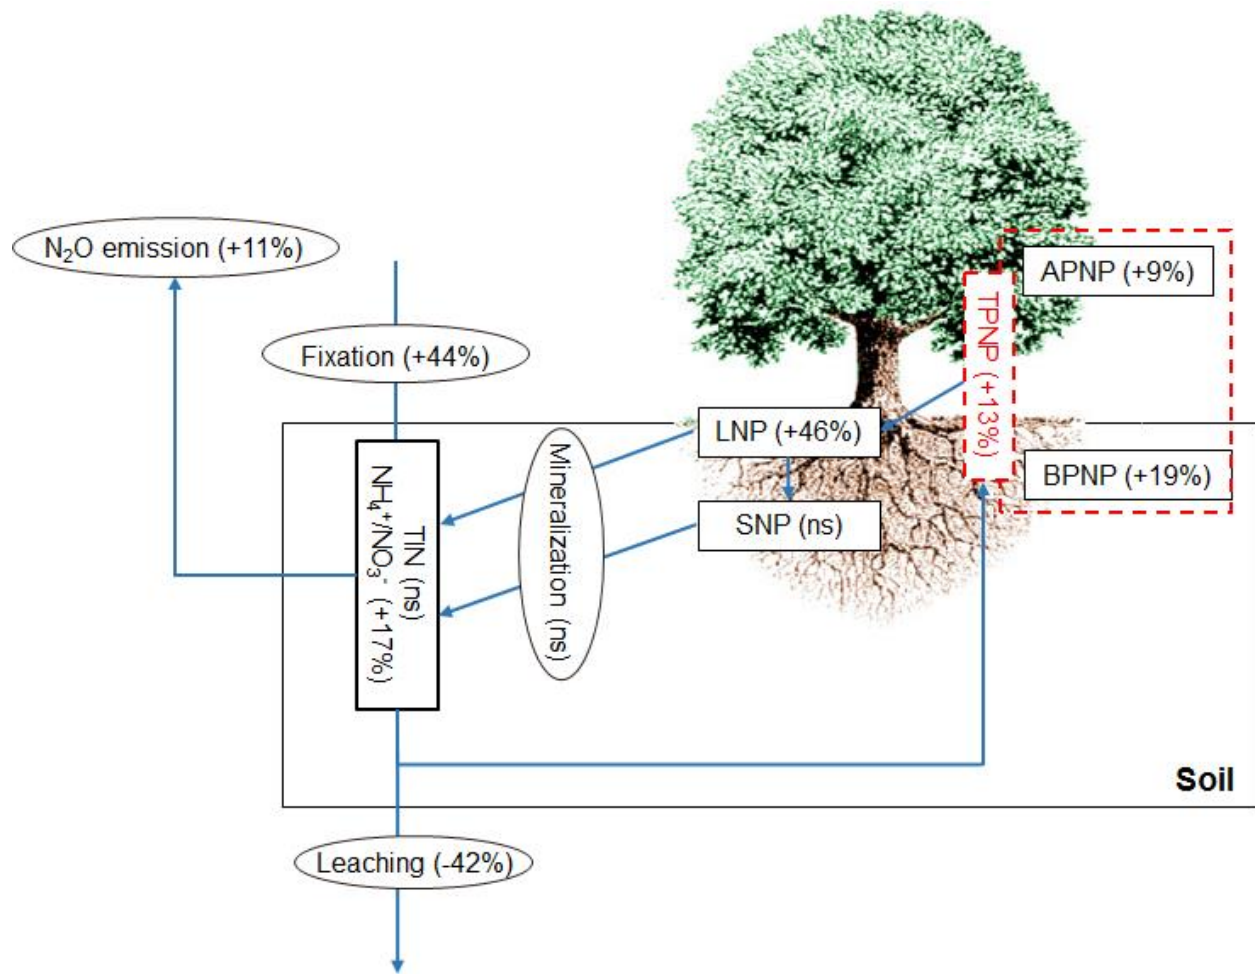

**Fig. S2.** Summary of the effect of CO<sub>2</sub> enrichment on ecosystem level N budget. Square boxes are nitrogen pools, ovals are nitrogen processes. Red dashed boxes mean the sum of the pools in the boxes. “+”, “-”, and “ns” mean the response to CO<sub>2</sub> enrichment are positive, negative, and not significant, respectively. Please see **Figure 1** for abbreviations.

## References S1 Papers from which the first dataset was extracted

- Allen AS, Andrews JA, Finzi AC, Matamala R, Richter DD, Schlesinger WH (2000) Effects of free-air CO<sub>2</sub> enrichment (FACE) on belowground processes in a *Pinus taeda* forest. *Ecological Applications*, **10**, 437-448.
- Ambus P, Robertson GP (1999) Fluxes of CH<sub>4</sub> and N<sub>2</sub>O in aspen stands grown under ambient and twice-ambient CO<sub>2</sub>. *Plant and Soil*, **209**, 1-8.
- Andresen LC, Michelsen A, Ambus P, Beier C (2010) Belowground heathland responses after 2 years of combined warming, elevated CO<sub>2</sub> and summer drought. *Biogeochemistry*, **101**, 27-42.
- Aranjuelo I, Irigoyen JJ, Perez P, Martinez-Carrasco R, Sanchez-Diaz M (2005) The use of temperature gradient tunnels for studying the combined effect of CO<sub>2</sub>, temperature and water availability in N<sub>2</sub> fixing alfalfa plants. *Annals of Applied Biology*, **146**, 51-60.
- Aranjuelo I, Pinto-Marijuan M, Avice JC, Fleck I (2011) Effect of elevated CO<sub>2</sub> on carbon partitioning in young *Quercus ilex* L. during resprouting. *Rapid Communications in Mass Spectrometry*, **25**, 1527-1535.
- Arnone JA (1997) Indices of plant N availability in an alpine grassland under elevated atmospheric CO<sub>2</sub>. *Plant and Soil*, **190**, 61-66.
- Arnone JA (1999) Symbiotic N<sub>2</sub> fixation in a high Alpine grassland: effects of four growing seasons of elevated CO<sub>2</sub>. *Functional Ecology*, **13**, 383-387.
- Arnone JA, Bohlen PJ (1998) Stimulated N<sub>2</sub>O flux from intact grassland monoliths after two growing seasons under elevated atmospheric CO<sub>2</sub>. *Oecologia*, **116**, 331-335.
- Arnone JA, Gordon JC (1990) Effect of Nodulation, Nitrogen Fixation and CO<sub>2</sub> Enrichment on the Physiology, Growth and Dry Mass Allocation of Seedlings of *Alnus-Rubra* Bong. *New Phytologist*, **116**, 55-66.
- Azam A, Khan I, Mahmood A, Hameed A (2013) Yield, chemical composition and nutritional quality responses of carrot, radish and turnip to elevated atmospheric carbon dioxide. *Journal of the Science of Food and Agriculture*, **93**, 3237-3244.
- Bader M, Hiltbrunner E, Korner C (2009) Fine root responses of mature deciduous forest trees to free air carbon dioxide enrichment (FACE). *Functional Ecology*, **23**, 913-921.
- Baggs EM, Blum H (2004) CH<sub>4</sub> oxidation and emissions of CH<sub>4</sub> and N<sub>2</sub>O from *Lolium perenne* swards under elevated atmospheric CO<sub>2</sub>. *Soil Biology & Biochemistry*, **36**, 713-723.
- Baggs EM, Richter M, Hartwig UA, Cadisch G (2003) Nitrous oxide emissions from grass swards during the eighth year of elevated atmospheric *p*CO<sub>2</sub> (Swiss FACE). *Global Change Biology*, **9**, 1214-1222.
- Barnard R, Barthes L, Le Roux X *et al.* (2004a) Atmospheric CO<sub>2</sub> elevation has little effect on nitrifying and denitrifying enzyme activity in four European grasslands. *Global Change Biology*, **10**, 488-497.
- Barnard R, Barthes L, Le Roux X, Leadley PW (2004b) Dynamics of nitrifying activities, denitrifying activities and nitrogen in grassland mesocosms as altered by elevated CO<sub>2</sub>. *New Phytologist*, **162**, 365-376.
- Baslam M, Erice G, Goicoechea N (2012) Impact of arbuscular mycorrhizal fungi (AMF) and atmospheric CO<sub>2</sub> concentration on the biomass production and partitioning in the forage legume alfalfa. *Symbiosis*, **58**, 171-181.

- Berntson GM, Bazzaz FA (1997) Nitrogen cycling in microcosms of yellow birch exposed to elevated CO<sub>2</sub>: Simultaneous positive and negative below-ground feedbacks. *Global Change Biology*, **3**, 247-258.
- Berntson GM, Bazzaz FA (1998) Regenerating temperate forest mesocosms in elevated CO<sub>2</sub>: belowground growth and nitrogen cycling. *Oecologia*, **113**, 115-125.
- Billes G, Rouhier H, Bottner P (1993) Modifications of the Carbon and Nitrogen Allocations in the Plant (*Triticum-Aestivum* L) Soil System in Response to Increased Atmospheric CO<sub>2</sub> Concentration. *Plant and Soil*, **157**, 215-225.
- Billings SA, Schaeffer SM, Evans RD (2002) Trace N gas losses and N mineralization in Mojave desert soils exposed to elevated CO<sub>2</sub>. *Soil Biology & Biochemistry*, **34**, 1777-1784.
- Billings SA, Schaeffer SM, Evans RD (2003) Nitrogen fixation by biological soil crusts and heterotrophic bacteria in an intact Mojave Desert ecosystem with elevated CO<sub>2</sub> and added soil carbon. *Soil Biology & Biochemistry*, **35**, 643-649.
- Billings SA, Schaeffer SM, Evans RD (2004) Soil microbial activity and N availability with elevated CO<sub>2</sub> in Mojave desert soils. *Global Biogeochemical Cycles*, **18**.
- Blank RR, Derner JD (2004) Effects of CO<sub>2</sub> enrichment on plant-soil relationships of *Lepidium latifolium*. *Plant and Soil*, **262**, 159-167.
- Bloor JMG, Niboyet A, Leadley PW, Barthes L (2009) CO<sub>2</sub> and inorganic N supply modify competition for N between co-occurring grass plants, tree seedlings and soil microorganisms. *Soil Biology & Biochemistry*, **41**, 544-552.
- Bradford MA, Wood SA, Maestre FT, Reynolds JF, Warren RJ (2012) Contingency in ecosystem but not plant community response to multiple global change factors. *New Phytologist*, **196**, 462-471.
- Brown ALP, Day FP, Hungate BA, Drake BG, Hinkle CR (2007) Root biomass and nutrient dynamics in a scrub-oak ecosystem under the influence of elevated atmospheric CO<sub>2</sub>. *Plant and Soil*, **292**, 219-232.
- Cabreri PM, Gonzalez EM, Aparicio-Tejo PM, Arrese-Igor C (2001) Continuous CO<sub>2</sub> enrichment leads to increased nodule biomass, carbon availability to nodules and activity of carbon-metabolising enzymes but does not enhance specific nitrogen fixation in pea. *Physiologia Plantarum*, **113**, 33-40.
- Calfapietra C, De Angelis P, Gielen B *et al.* (2007) Increased nitrogen-use efficiency of a short-rotation poplar plantation in elevated CO<sub>2</sub> concentration. *Tree Physiology*, **27**, 1153-1163.
- Cantarel AaM, Bloor JMG, Deltroy N, Soussana JF (2011) Effects of Climate Change Drivers on Nitrous Oxide Fluxes in an Upland Temperate Grassland. *Ecosystems*, **14**, 223-233.
- Carnol M, Hogenboom L, Jach ME, Remacle J, Ceulemans R (2002) Elevated atmospheric CO<sub>2</sub> in open top chambers increases net nitrification and potential denitrification. *Global Change Biology*, **8**, 590-598.
- Carrillo Y, Dijkstra FA, Pendall E, Morgan JA, Blumenthal DM (2012) Controls over Soil Nitrogen Pools in a Semiarid Grassland Under Elevated CO<sub>2</sub> and Warming. *Ecosystems*, **15**, 761-774.
- Cheng L, Booker FL, Burkey KO *et al.* (2011) Soil Microbial Responses to Elevated CO<sub>2</sub> and O<sub>3</sub> in a Nitrogen-Aggrading Agroecosystem. *Plos One*, **6**.
- Cheng WG, Inubushi K, Yagi K, Sakai H, Kobayashi K (2001) Effects of elevated carbon dioxide concentration on biological nitrogen fixation, nitrogen mineralization and carbon decomposition in submerged rice soil. *Biology and Fertility of Soils*, **34**, 7-13.

- Cheng WG, Yagi K, Sakai H, Kobayashi K (2006) Effects of elevated atmospheric CO<sub>2</sub> concentrations on CH<sub>4</sub> and N<sub>2</sub>O emission from rice soil: An experiment in controlled-environment chambers. *Biogeochemistry*, **77**, 351-373.
- Curtis PS, Balduman LM, Drake BG, Whigham DF (1990) Elevated Atmospheric CO<sub>2</sub> Effects on Belowground Processes in C<sub>3</sub> and C<sub>4</sub> Estuarine Marsh Communities. *Ecology*, **71**, 2001-2006.
- Daepf M, Nosberger J, Luscher A (2001) Nitrogen fertilization and developmental stage alter the response of *Lolium perenne* to elevated CO<sub>2</sub>. *New Phytologist*, **150**, 347-358.
- Daepf M, Suter D, Almeida JPF *et al.* (2000) Yield response of *Lolium perenne* swards to free air CO<sub>2</sub> enrichment increased over six years in a high N input system on fertile soil. *Global Change Biology*, **6**, 805-816.
- Dakora FD, Drake BG (2000) Elevated CO<sub>2</sub> stimulates associative N<sub>2</sub> fixation in a C<sub>3</sub> plant of the Chesapeake Bay wetland. *Plant Cell and Environment*, **23**, 943-953.
- Das S, Bhattacharyya P, Adhya TK (2011) Impact of elevated CO<sub>2</sub>, flooding, and temperature interaction on heterotrophic nitrogen fixation in tropical rice soils. *Biology and Fertility of Soils*, **47**, 25-30.
- De Graaff MA, Van Kessel C, Six J (2009) Rhizodeposition-induced decomposition increases N availability to wild and cultivated wheat genotypes under elevated CO<sub>2</sub>. *Soil Biology & Biochemistry*, **41**, 1094-1103.
- Decock C, Chung H, Venterea R, Gray SB, Leakey ADB, Six J (2012) Elevated CO<sub>2</sub> and O<sub>3</sub> modify N turnover rates, but not N<sub>2</sub>O emissions in a soybean agroecosystem. *Soil Biology & Biochemistry*, **51**, 104-114.
- Dijkstra FA, Blumenthal D, Morgan JA, Lecain DR, Follett RF (2010a) Elevated CO<sub>2</sub> effects on semi-arid grassland plants in relation to water availability and competition. *Functional Ecology*, **24**, 1152-1161.
- Dijkstra FA, Blumenthal D, Morgan JA, Pendall E, Carrillo Y, Follett RF (2010b) Contrasting effects of elevated CO<sub>2</sub> and warming on nitrogen cycling in a semiarid grassland. *New Phytologist*, **187**, 426-437.
- Dijkstra FA, Hobbie SE, Reich PB, Knops JMH (2005) Divergent effects of elevated CO<sub>2</sub>, N fertilization, and plant diversity on soil C and N dynamics in a grassland field experiment. *Plant and Soil*, **272**, 41-52.
- Dijkstra FA, Morgan JA, Lecain DR, Follett RF (2010c) Microbially mediated CH<sub>4</sub> consumption and N<sub>2</sub>O emission is affected by elevated CO<sub>2</sub>, soil water content, and composition of semi-arid grassland species. *Plant and Soil*, **329**, 269-281.
- Dijkstra FA, West JB, Hobbie SE, Reich PB, Trost J (2007) Plant diversity, CO<sub>2</sub>, and N influence inorganic and organic N leaching in grasslands. *Ecology*, **88**, 490-500.
- Dorodnikov M, Kuzyakov Y, Fangmeier A, Wiesenberger GLB (2011) C and N in soil organic matter density fractions under elevated atmospheric CO<sub>2</sub>: Turnover vs. stabilization. *Soil Biology & Biochemistry*, **43**, 579-589.
- Drake JE, Oishi AC, Giasson MA, Oren R, Johnsen KH, Finzi AC (2012) Trenching reduces soil heterotrophic activity in a loblolly pine (*Pinus taeda*) forest exposed to elevated atmospheric [CO<sub>2</sub>] and N fertilization. *Agricultural and Forest Meteorology*, **165**, 43-52.
- Duan BL, Zhang XL, Li YP, Li L, Korpelainen H, Li CY (2013) Plastic responses of *Populus yunnanensis* and *Abies faxoniana* to elevated atmospheric CO<sub>2</sub> and warming. *Forest Ecology and Management*, **296**, 33-40.

- Feng Z, Dyckmans J, Flessa H (2004) Effects of elevated carbon dioxide concentration on growth and N<sub>2</sub> fixation of young *Robinia pseudoacacia*. *Tree Physiology*, **24**, 323-330.
- Finzi AC, Delucia EH, Hamilton JG, Richter DD, Schlesinger WH (2002) The nitrogen budget of a pine forest under free air CO<sub>2</sub> enrichment. *Oecologia*, **132**, 567-578.
- Finzi AC, Schlesinger WH (2003) Soil-nitrogen cycling in a pine forest exposed to 5 years of elevated carbon dioxide. *Ecosystems*, **6**, 444-456.
- Franzaring J, Gensheimer G, Weller S, Schmid I, Fangmeier A (2012) Allocation and remobilisation of nitrogen in spring oilseed rape (*Brassica napus* L. cv. Mozart) as affected by N supply and elevated CO<sub>2</sub>. *Environmental and Experimental Botany*, **83**, 12-22.
- Garten CT, Iversen CM, Norby RJ (2011) Litterfall <sup>15</sup>N abundance indicates declining soil nitrogen availability in a free-air CO<sub>2</sub> enrichment experiment. *Ecology*, **92**, 133-139.
- Gill RA, Anderson LJ, Polley HW, Johnson HB, Jackson RB (2006) Potential nitrogen constraints on soil carbon sequestration under low and elevated atmospheric CO<sub>2</sub>. *Ecology*, **87**, 41-52.
- Gill RA, Polley HW, Johnson HB, Anderson LJ, Maherali H, Jackson RB (2002) Nonlinear grassland responses to past and future atmospheric CO<sub>2</sub>. *Nature*, **417**, 279-282.
- Gloser V, Jezikova M, Luscher A, Frehner M, Blum H, Nosberger J, Hartwig UA (2000) Soil mineral nitrogen availability was unaffected by elevated atmospheric pCO<sub>2</sub> in a four year old field experiment (Swiss FACE). *Plant and Soil*, **227**, 291-299.
- Gray SB, Strellner RS, Puthuval KK *et al.* (2013) Minirhizotron imaging reveals that nodulation of field-grown soybean is enhanced by free-air CO<sub>2</sub> enrichment only when combined with drought stress. *Functional Plant Biology*, **40**, 137-147.
- Guenet B, Lenhart K, Leloup J *et al.* (2012) The impact of long-term CO<sub>2</sub> enrichment and moisture levels on soil microbial community structure and enzyme activities. *Geoderma*, **170**, 331-336.
- Gutierrez D, Morcuende R, Del Pozo A, Martinez-Carrasco R, Perez P (2013) Involvement of nitrogen and cytokinins in photosynthetic acclimation to elevated CO<sub>2</sub> of spring wheat. *Journal of Plant Physiology*, **170**, 1337-1343.
- Hagedorn F, Bucher JB, Tarjan D, Rusert P, Bucher-Wallin I (2000) Responses of N fluxes and pools to elevated atmospheric CO<sub>2</sub> in model forest ecosystems with acidic and calcareous soils. *Plant and Soil*, **224**, 273-286.
- Hall JM, Paterson E, Killham K (1998) The effect of elevated CO<sub>2</sub> concentration and soil pH on the relationship between plant growth and rhizosphere denitrification potential. *Global Change Biology*, **4**, 209-216.
- Hartwig UA, Luscher A, Nosberger J, Van Kessel C (2002) Nitrogen-15 budget in model ecosystems of white clover and perennial ryegrass exposed for four years at elevated atmospheric pCO<sub>2</sub>. *Global Change Biology*, **8**, 194-202.
- Hibbs DE, Chan SS, Castellano M, Niu CH (1995) Response of Red Alder Seedlings to CO<sub>2</sub> Enrichment and Water Stress. *New Phytologist*, **129**, 569-577.
- Hillstrom M, Meehan TD, Kelly K, Lindroth RL (2010) Soil carbon and nitrogen mineralization following deposition of insect frass and greenfall from forests under elevated CO<sub>2</sub> and O<sub>3</sub>. *Plant and Soil*, **336**, 75-85.
- Hofmockel KS, Schlesinger WH (2007) Carbon dioxide effects on heterotrophic dinitrogen fixation in a temperate pine forest. *Soil Science Society of America Journal*, **71**, 140-144.

- Hoosbeek MR, Lukac M, Velthorst E, Smith AR, Godbold DL (2011) Free atmospheric CO<sub>2</sub> enrichment increased above ground biomass but did not affect symbiotic N<sub>2</sub>-fixation and soil carbon dynamics in a mixed deciduous stand in Wales. *Biogeosciences*, **8**, 353-364.
- Hoosbeek MR, Scarascia-Mugnozza GE (2009) Increased Litter Build Up and Soil Organic Matter Stabilization in a Poplar Plantation After 6 Years of Atmospheric CO<sub>2</sub> Enrichment (FACE): Final Results of POP-EuroFACE Compared to Other Forest FACE Experiments. *Ecosystems*, **12**, 220-239.
- Hoque MM, Inubushi K, Miura S, Kobayashi K, Kim HY, Okada M, Yabashi S (2001) Biological dinitrogen fixation and soil microbial biomass carbon as influenced by free-air carbon dioxide enrichment (FACE) at three levels of nitrogen fertilization in a paddy field. *Biology and Fertility of Soils*, **34**, 453-459.
- Hovenden MJ, Newton PCD, Carran RA *et al.* (2008) Warming prevents the elevated CO<sub>2</sub>-induced reduction in available soil nitrogen in a temperate, perennial grassland. *Global Change Biology*, **14**, 1018-1024.
- Hungate BA, Canadell J, Chapin FS (1996) Plant species mediate changes in soil microbial N in response to elevated CO<sub>2</sub>. *Ecology*, **77**, 2505-2515.
- Hungate BA, Chapin FS, Zhong H, Holland EA, Field CB (1997a) Stimulation of grassland nitrogen cycling under carbon dioxide enrichment. *Oecologia*, **109**, 149-153.
- Hungate BA, Johnson DW, Dijkstra P *et al.* (2006) Nitrogen cycling during seven years of atmospheric CO<sub>2</sub> enrichment in a scrub oak woodland. *Ecology*, **87**, 26-40.
- Hungate BA, Lund CP, Pearson HL, Chapin FS (1997b) Elevated CO<sub>2</sub> and nutrient addition alter soil N cycling and N trace gas fluxes with early season wet-up in a California annual grassland. *Biogeochemistry*, **37**, 89-109.
- Hungate BA, Stiling PD, Dijkstra P *et al.* (2004) CO<sub>2</sub> elicits long-term decline in nitrogen fixation. *Science*, **304**, 1291-1291.
- Ineson P, Coward PA, Hartwig UA (1998) Soil gas fluxes of N<sub>2</sub>O, CH<sub>4</sub> and CO<sub>2</sub> beneath *Lolium perenne* under elevated CO<sub>2</sub>: The Swiss free air carbon dioxide enrichment experiment. *Plant and Soil*, **198**, 89-95.
- Iversen CM, Keller JK, Garten CT, Norby RJ (2012) Soil carbon and nitrogen cycling and storage throughout the soil profile in a sweetgum plantation after 11 years of CO<sub>2</sub>-enrichment. *Global Change Biology*, **18**, 1684-1697.
- Jastrow JD, Miller RM, Matamala R, Norby RJ, Boutton TW, Rice CW, Owensby CE (2005) Elevated atmospheric carbon dioxide increases soil carbon. *Global Change Biology*, **11**, 2057-2064.
- Jastrow JD, Miller RM, Owensby CE (2000) Long-term effects of elevated atmospheric CO<sub>2</sub> on below-ground biomass and transformations to soil organic matter in grassland. *Plant and Soil*, **224**, 85-97.
- Jin J, Tang CX, Armstrong R, Sale P (2012) Phosphorus supply enhances the response of legumes to elevated CO<sub>2</sub> (FACE) in a phosphorus-deficient vertisol. *Plant and Soil*, **358**, 91-104.
- Johnson DW, Ball JT, Walker RF (1997) Effects of CO<sub>2</sub> and nitrogen fertilization on vegetation and soil nutrient content in juvenile ponderosa pine. *Plant and Soil*, **190**, 29-40.
- Johnson DW, Cheng W, Joslin JD, Norby RJ, Edwards NT, Todd DE (2004) Effects of elevated CO<sub>2</sub> on nutrient cycling in a sweetgum plantation. *Biogeochemistry*, **69**, 379-403.
- Johnson DW, Hoyleman AM, Ball JT, Walker RF (2006) Ponderosa pine responses to elevated CO<sub>2</sub> and nitrogen fertilization. *Biogeochemistry*, **77**, 157-175.

- Johnson DW, Hungate BA, Dijkstra P, Hymus G, Drake B (2001) Effects of elevated carbon dioxide on soils in a Florida scrub oak ecosystem. *Journal of Environmental Quality*, **30**, 501-507.
- Johnson DW, Hungate BA, Dijkstra P, Hymus G, Hinkle CR, Stiling P, Drake BG (2003) The effects of elevated CO<sub>2</sub> on nutrient distribution in a fire-adapted scrub oak forest. *Ecological Applications*, **13**, 1388-1399.
- Kammann C, Muller C, Grunhage L, Jager HJ (2008) Elevated CO<sub>2</sub> stimulates N<sub>2</sub>O emissions in permanent grassland. *Soil Biology & Biochemistry*, **40**, 2194-2205.
- Kampichler C, Kandeler E, Bardgett RD, Jones TH, Thompson LJ (1998) Impact of elevated atmospheric CO<sub>2</sub> concentration on soil microbial biomass and activity in a complex, weedy field model ecosystem. *Global Change Biology*, **4**, 335-346.
- Kanerva T, Palojarvi A, Ramo K, Ojanpera K, Esala M, Manninen S (2006) A 3-year exposure to CO<sub>2</sub> and O<sub>3</sub> induced minor changes in soil N cycling in a meadow ecosystem. *Plant and Soil*, **286**, 61-73.
- Kettunen R, Saarnio S, Martikainen P, Silvola J (2005) Elevated CO<sub>2</sub> concentration and nitrogen fertilisation effects on N<sub>2</sub>O and CH<sub>4</sub> fluxes and biomass production of *Phleum pratense* on farmed peat soil. *Soil Biology & Biochemistry*, **37**, 739-750.
- Kettunen R, Saarnio S, Martikainen PJ, Silvola J (2007) Can a mixed stand of N<sub>2</sub>-fixing and non-fixing plants restrict N<sub>2</sub>O emissions with increasing CO<sub>2</sub> concentration? *Soil Biology & Biochemistry*, **39**, 2538-2546.
- Kim HY, Lim SS, Kwak JH, Lee DS, Lee SM, Ro HM, Choi WJ (2011) Dry matter and nitrogen accumulation and partitioning in rice (*Oryza sativa* L.) exposed to experimental warming with elevated CO<sub>2</sub>. *Plant and Soil*, **342**, 59-71.
- Lam SK, Chen D, Norton R, Armstrong R (2013a) The effect of elevated atmospheric carbon dioxide concentration on the contribution of residual legume and fertilizer nitrogen to a subsequent wheat crop. *Plant and Soil*, **364**, 81-91.
- Lam SK, Chen D, Norton R, Armstrong R, Mosier AR (2013b) Influence of elevated atmospheric carbon dioxide and supplementary irrigation on greenhouse gas emissions from a spring wheat crop in southern Australia. *Journal of Agricultural Science*, **151**, 201-208.
- Lam SK, Chen DL, Norton R, Armstrong R (2012a) Does phosphorus stimulate the effect of elevated [CO<sub>2</sub>] on growth and symbiotic nitrogen fixation of grain and pasture legumes? *Crop & Pasture Science*, **63**, 53-62.
- Lam SK, Chen DL, Norton R, Armstrong R (2012b) Nitrogen demand and the recovery of <sup>15</sup>N-labelled fertilizer in wheat grown under elevated carbon dioxide in southern Australia. *Nutrient Cycling in Agroecosystems*, **92**, 133-144.
- Lam SK, Chen DL, Norton R, Armstrong R (2013c) Crop residue incorporation negates the positive effect of elevated atmospheric carbon dioxide concentration on wheat productivity and fertilizer nitrogen recovery. *Plant and Soil*, **366**, 551-561.
- Lam SK, Han X, Lin ED, Norton R, Chen DL (2012c) Does elevated atmospheric carbon dioxide concentration increase wheat nitrogen demand and recovery of nitrogen applied at stem elongation? *Agriculture Ecosystems & Environment*, **155**, 142-146.
- Lam SK, Hao XY, Lin ED *et al.* (2012d) Effect of elevated carbon dioxide on growth and nitrogen fixation of two soybean cultivars in northern China. *Biology and Fertility of Soils*, **48**, 603-606.



- Lam SK, Lin ED, Norton R, Chen DL (2011) The effect of increased atmospheric carbon dioxide concentration on emissions of nitrous oxide, carbon dioxide and methane from a wheat field in a semi-arid environment in northern China. *Soil Biology & Biochemistry*, **43**, 458-461.
- Langley JA, Mckinley DC, Wolf AA, Hungate BA, Drake BG, Megonigal JP (2009) Priming depletes soil carbon and releases nitrogen in a scrub-oak ecosystem exposed to elevated CO<sub>2</sub>. *Soil Biology & Biochemistry*, **41**, 54-60.
- Larsen KS, Andresen LC, Beier C *et al.* (2011) Reduced N cycling in response to elevated CO<sub>2</sub>, warming, and drought in a Danish heathland: Synthesizing results of the CLIMAITE project after two years of treatments. *Global Change Biology*, **17**, 1884-1899.
- Lee TD, Reich PB, Tjoelker MG (2003) Legume presence increases photosynthesis and N concentrations of co-occurring non-fixers but does not modulate their responsiveness to carbon dioxide enrichment. *Oecologia*, **137**, 22-31.
- Lichter J, Billings SA, Ziegler SE *et al.* (2008) Soil carbon sequestration in a pine forest after 9 years of atmospheric CO<sub>2</sub> enrichment. *Global Change Biology*, **14**, 2910-2922.
- Liu JX, Zhang DQ, Zhou GY, Faivre-Vuillin B, Deng Q, Wang CL (2008) CO<sub>2</sub> enrichment increases nutrient leaching from model forest ecosystems in subtropical China. *Biogeosciences*, **5**, 1783-1795.
- Liu LL, King JS, Giardina CP (2007) Effects of elevated atmospheric CO<sub>2</sub> and tropospheric O<sub>3</sub> on nutrient dynamics: decomposition of leaf litter in trembling aspen and paper birch communities. *Plant and Soil*, **299**, 65-82.
- Long X, Chen CR, Xu ZH, Oren R, He JZ (2012) Abundance and community structure of ammonia-oxidizing bacteria and archaea in a temperate forest ecosystem under ten-years elevated CO<sub>2</sub>. *Soil Biology & Biochemistry*, **46**, 163-171.
- Luscher A, Hartwig UA, Suter D, Nosberger J (2000) Direct evidence that symbiotic N-2 fixation in fertile grassland is an important trait for a strong response of plants to elevated atmospheric CO<sub>2</sub>. *Global Change Biology*, **6**, 655-662.
- Martin-Olmedo P, Rees RM, Grace J (2002) The influence of plants grown under elevated CO<sub>2</sub> and N fertilization on soil nitrogen dynamics. *Global Change Biology*, **8**, 643-657.
- Mckinley DC, Romero JC, Hungate BA, Drake BG, Megonigal JP (2009) Does deep soil N availability sustain long-term ecosystem responses to elevated CO<sub>2</sub>? *Global Change Biology*, **15**, 2035-2048.
- Mikan CJ, Zak DR, Kubiske ME, Pregitzer KS (2000) Combined effects of atmospheric CO<sub>2</sub> and N availability on the belowground carbon and nitrogen dynamics of aspen mesocosms. *Oecologia*, **124**, 432-445.
- Millett J, Godbold D, Smith AR, Grant H (2012) N-2 fixation and cycling in *Alnus glutinosa*, *Betula pendula* and *Fagus sylvatica* woodland exposed to free air CO<sub>2</sub> enrichment. *Oecologia*, **169**, 541-552.
- Mosier AR, Morgan JA, King JY, Lecain D, Milchunas DG (2002) Soil-atmosphere exchange of CH<sub>4</sub>, CO<sub>2</sub>, NO<sub>x</sub>, and N<sub>2</sub>O in the Colorado shortgrass steppe under elevated CO<sub>2</sub>. *Plant and Soil*, **240**, 201-211.
- Nam HS, Kwak JH, Lim SS *et al.* (2013) Fertilizer N uptake of paddy rice in two soils with different fertility under experimental warming with elevated CO<sub>2</sub>. *Plant and Soil*, **369**, 563-575.
- Newton PCD, Clark H, Bell CC *et al.* (1995) Plant growth and soil processes in temperate grassland communities at elevated CO<sub>2</sub>. *Journal of Biogeography*, **22**, 235-240.

- Nguyen NT, Mohapatra PK, Fujita K (2006) Elevated CO<sub>2</sub> alleviates the effects of low P on the growth of N<sub>2</sub>-fixing *Acacia auriculiformis* and *Acacia mangium*. *Plant and Soil*, **285**, 369-379.
- Niboyet A, Barthes L, Hungate BA *et al.* (2010) Responses of soil nitrogen cycling to the interactive effects of elevated CO<sub>2</sub> and inorganic N supply. *Plant and Soil*, **327**, 35-47.
- Niboyet A, Brown JR, Dijkstra P *et al.* (2011) Global Change Could Amplify Fire Effects on Soil Greenhouse Gas Emissions. *Plos One*, **6**.
- Niklaus PA, Alphei D, Ebersberger D, Kampichler C, Kandeler E, Tscherko D (2003) Six years of in situ CO<sub>2</sub> enrichment evoke changes in soil structure and soil biota of nutrient-poor grassland. *Global Change Biology*, **9**, 585-600.
- Niklaus PA, Leadley PW, Stocklin J, Korner C (1998) Nutrient relations in calcareous grassland under elevated CO<sub>2</sub>. *Oecologia*, **116**, 67-75.
- Nitschelm JJ, Luscher A, Hartwig UA, Vankessel C (1997) Using stable isotopes to determine soil carbon input differences under ambient and elevated atmospheric CO<sub>2</sub> conditions. *Global Change Biology*, **3**, 411-416.
- Norby RJ (1987) Nodulation and Nitrogenase Activity in Nitrogen-Fixing Woody-Plants Stimulated by CO<sub>2</sub> Enrichment of the Atmosphere. *Physiologia Plantarum*, **71**, 77-82.
- Norby RJ, Iversen CM (2006) Nitrogen uptake, distribution, turnover, and efficiency of use in a CO<sub>2</sub>-enriched sweetgum forest. *Ecology*, **87**, 5-14.
- Oikawa S, Miyagi KM, Hikosaka K *et al.* (2010) Interactions between elevated CO<sub>2</sub> and N<sub>2</sub>-fixation determine soybean yield-a test using a non-nodulated mutant. *Plant and Soil*, **330**, 163-172.
- Olszyk DM, Johnson MG, Phillips DL, Seidler RJ, Tingey DT, Watrud LS (2001) Interactive effects of CO<sub>2</sub> and O<sub>3</sub> on a ponderosa pine plant/litter/soil mesocosm. *Environmental Pollution*, **115**, 447-462.
- Pang J, Zhu JG, Xie ZB *et al.* (2006) A new explanation of the N concentration decrease in tissues of rice (*Oryza sativa* L.) exposed to elevated atmospheric pCO<sub>2</sub>. *Environmental and Experimental Botany*, **57**, 98-105.
- Perez-Lopez U, Robredo A, Miranda-Apodaca J, Lacuesta M, Munoz-Rueda A, Mena-Petite A (2013) Carbon dioxide enrichment moderates salinity-induced effects on nitrogen acquisition and assimilation and their impact on growth in barley plants. *Environmental and Experimental Botany*, **87**, 148-158.
- Phillips RL, Whalen SC, Schlesinger WH (2001) Influence of atmospheric CO<sub>2</sub> enrichment on nitrous oxide flux in a temperate forest ecosystem. *Global Biogeochemical Cycles*, **15**, 741-752.
- Phillips RP, Meier IC, Bernhardt ES, Grandy AS, Wickings K, Finzi AC (2012) Roots and fungi accelerate carbon and nitrogen cycling in forests exposed to elevated CO<sub>2</sub>. *Ecology Letters*, **15**, 1042-1049.
- Pinay G, Barbera P, Carreras-Palou A *et al.* (2007) Impact of atmospheric CO<sub>2</sub> and plant life forms on soil microbial activities. *Soil Biology & Biochemistry*, **39**, 33-42.
- Pleijel H, Sild J, Danielsson H, Klemetsson L (1998) Nitrous oxide emissions from a wheat field in response to elevated carbon dioxide concentration and open-top chamber enclosure. *Environmental Pollution*, **102**, 167-171.
- Polley HW, Johnson HB, Mayeux HS (1997) Leaf physiology, production, water use, and nitrogen dynamics of the grassland invader *Acacia smallii* at elevated CO<sub>2</sub> concentrations. *Tree Physiology*, **17**, 89-96.

- Pregitzer KS, Zak DR, Curtis PS, Kubiske ME, Teeri JA, Vogel CS (1995) Atmospheric CO<sub>2</sub>, Soil-Nitrogen and Turnover of Fine Roots. *New Phytologist*, **129**, 579-585.
- Prior SA, Torbert HA, Runion GB *et al.* (1997) Free-air carbon dioxide enrichment of wheat: Soil carbon and nitrogen dynamics. *Journal of Environmental Quality*, **26**, 1161-1166.
- Rakshit R, Patra AK, Pal D, Kumar M, Singh R (2012) Effect of Elevated CO<sub>2</sub> and Temperature on Nitrogen Dynamics and Microbial Activity During Wheat (*Triticum aestivum* L.) Growth on a Subtropical Inceptisol in India. *Journal of Agronomy and Crop Science*, **198**, 452-465.
- Reich PB, Hobbie SE (2013) Decade-long soil nitrogen constraint on the CO<sub>2</sub> fertilization of plant biomass. *Nature Climate Change*, **3**, 278-282.
- Reich PB, Tilman D, Craine J *et al.* (2001) Do species and functional groups differ in acquisition and use of C, N and water under varying atmospheric CO<sub>2</sub> and N availability regimes? A field test with 16 grassland species. *New Phytologist*, **150**, 435-448.
- Ross DJ, Newton PCD, Tate KR, Luo DW (2013) Impact of a low level of CO<sub>2</sub> enrichment on soil carbon and nitrogen pools and mineralization rates over ten years in a seasonally dry, grazed pasture. *Soil Biology & Biochemistry*, **58**, 265-274.
- Ross DJ, Tate KR, Newton PCD (1995) Elevated CO<sub>2</sub> and Temperature Effects on Soil Carbon and Nitrogen Cycling in Ryegrass/White Clover Turves of an Endoaquept Soil. *Plant and Soil*, **176**, 37-49.
- Roy KS, Bhattacharyya P, Neogi S, Rao KS, Adhya TK (2012) Combined effect of elevated CO<sub>2</sub> and temperature on dry matter production, net assimilation rate, C and N allocations in tropical rice (*Oryza sativa* L.). *Field Crops Research*, **139**, 71-79.
- Runion GB, Entry JA, Prior SA, Mitchell RJ, Rogers HH (1999) Tissue chemistry and carbon allocation in seedlings of *Pinus palustris* subjected to elevated atmospheric CO<sub>2</sub> and water stress. *Tree Physiology*, **19**, 329-335.
- Rutting T, Clough TJ, Muller C, Lieffering M, Newton PCD (2010) Ten years of elevated atmospheric carbon dioxide alters soil nitrogen transformations in a sheep-grazed pasture. *Global Change Biology*, **16**, 2530-2542.
- Schleppi P, Bucher-Wallin I, Hagedorn F, Korner C (2012) Increased nitrate availability in the soil of a mixed mature temperate forest subjected to elevated CO<sub>2</sub> concentration (canopy FACE). *Global Change Biology*, **18**, 757-768.
- Schlesinger WH, Lichter J (2001) Limited carbon storage in soil and litter of experimental forest plots under increased atmospheric CO<sub>2</sub>. *Nature*, **411**, 466-469.
- Schortemeyer M, Atkin OK, Mcfarlane N, Evans JR (2002) N<sub>2</sub> fixation by *Acacia* species increases under elevated atmospheric CO<sub>2</sub>. *Plant Cell and Environment*, **25**, 567-579.
- Serraj R, Sinclair TR (2003) Evidence that carbon dioxide enrichment alleviates ureide-induced decline of nodule nitrogenase activity. *Annals of Botany*, **91**, 85-89.
- Sherwin GL, George L, Kannangara K, Tissue DT, Ghannoum O (2013) Impact of industrial-age climate change on the relationship between water uptake and tissue nitrogen in eucalypt seedlings. *Functional Plant Biology*, **40**, 201-212.
- Shimono H, Konno T, Sakai H, Sameshima R (2012) Interactive Effects of Elevated Atmospheric CO<sub>2</sub> and Waterlogging on Vegetative Growth of Soybean (*Glycine max* (L.) Merr.). *Plant Production Science*, **15**, 238-245.
- Smart DR, Ritchie K, Stark JM, Bugbee B (1997) Evidence that elevated CO<sub>2</sub> levels can indirectly increase rhizosphere denitrifier activity. *Applied and Environmental Microbiology*, **63**, 4621-4624.

- Smith KE, Runion GB, Prior SA, Rogers HH, Torbert HA (2010) Effects of Elevated CO<sub>2</sub> and Agricultural Management on Flux of Greenhouse Gases From Soil. *Soil Science*, **175**, 349-356.
- Soussana JF, Casella E, Loiseau P (1996) Long-term effects of CO<sub>2</sub> enrichment and temperature increase on a temperate grass sward .II. Plant nitrogen budgets and root fraction. *Plant and Soil*, **182**, 101-114.
- Talhelm AF, Pregitzer KS, Giardina CP (2012) Long-Term Leaf Production Response to Elevated Atmospheric Carbon Dioxide and Tropospheric Ozone. *Ecosystems*, **15**, 71-82.
- Temperton VM, Grayston SJ, Jackson G, Barton CVM, Millard P, Jarvis PG (2003) Effects of elevated carbon dioxide concentration on growth and nitrogen fixation in *Alnus glutinosa* in a long-term field experiment. *Tree Physiology*, **23**, 1051-1059.
- Thomas RB, Bashkin MA, Richter DD (2000) Nitrogen inhibition of nodulation and N<sub>2</sub> fixation of a tropical N<sub>2</sub>-fixing tree (*Gliricidia sepium*) grown in elevated atmospheric CO<sub>2</sub>. *New Phytologist*, **145**, 233-243.
- Tingey DT, Mckane RB, Olszyk DM, Johnson MG, Rygiewicz PT, Lee EH (2003) Elevated CO<sub>2</sub> and temperature alter nitrogen allocation in Douglas-fir. *Global Change Biology*, **9**, 1038-1050.
- Tobita H, Uemura A, Kitao M, Kitaoka S, Utsugi H (2010) Interactive effects of elevated CO<sub>2</sub>, phosphorus deficiency, and soil drought on nodulation and nitrogenase activity in *Alnus hirsuta* and *Alnus maximowiczii*. *Symbiosis*, **50**, 59-69.
- Torbert HA, Prior SA, Rogers HH, Runion GB (2004) Elevated atmospheric CO<sub>2</sub> effects on N fertilization in grain sorghum and soybean. *Field Crops Research*, **88**, 57-67.
- Tscherko D, Kandeler E, Jones TH (2001) Effect of temperature on below-ground N-dynamics in a weedy model ecosystem at ambient and elevated atmospheric CO<sub>2</sub> levels. *Soil Biology & Biochemistry*, **33**, 491-501.
- Tu C, Booker FL, Burkey KO, Hu SJ (2009) Elevated Atmospheric Carbon Dioxide and O<sub>3</sub> Differentially Alter Nitrogen Acquisition in Peanut. *Crop Science*, **49**, 1827-1836.
- Van Groenigen KJ, Harris D, Horwath WR, Hartwig UA, Van Kessel C (2002) Linking sequestration of <sup>13</sup>C and <sup>15</sup>N in aggregates in a pasture soil following 8 years of elevated atmospheric CO<sub>2</sub>. *Global Change Biology*, **8**, 1094-1108.
- Van Kessel C, Boots B, De Graaff MA, Harris D, Blum H, Six J (2006) Total soil C and N sequestration in a grassland following 10 years of free air CO<sub>2</sub> enrichment. *Global Change Biology*, **12**, 2187-2199.
- Verburg PSJ, Cheng W, Johnson DW, Schorran DE (2004) Nonsymbiotic nitrogen fixation in 3-year-old Jeffrey pines and the role of elevated [CO<sub>2</sub>]. *Canadian Journal of Forest Research-Revue Canadienne De Recherche Forestiere*, **34**, 1979-1984.
- Vogel CS, Curtis PS, Thomas RB (1997) Growth and nitrogen accretion of dinitrogen-fixing *Alnus glutinosa* (L) Gaertn under elevated carbon dioxide. *Plant Ecology*, **130**, 63-70.
- Weerakoon WMW, Ingram KT, Moss DN (2005) Atmospheric CO<sub>2</sub> concentration effects on N partitioning and fertilizer N recovery in field grown rice (*Oryza sativa* L.). *Agriculture Ecosystems & Environment*, **108**, 342-349.
- Weigel HJ, Manderscheid R (2012) Crop growth responses to free air CO<sub>2</sub> enrichment and nitrogen fertilization: Rotating barley, ryegrass, sugar beet and wheat. *European Journal of Agronomy*, **43**, 97-107.

- Welzmler JT, Matthias AD, White S, Thompson TL (2008) Elevated carbon dioxide and irrigation effects on soil nitrogen gas exchange in irrigated sorghum. *Soil Science Society of America Journal*, **72**, 393-401.
- West JB, Hillerislambers J, Lee TD, Hobbie SE, Reich PB (2005) Legume species identity and soil nitrogen supply determine symbiotic nitrogen-fixation responses to elevated atmospheric [CO<sub>2</sub>]. *New Phytologist*, **167**, 523-530.
- Williams MA, Rice CW, Owensby CE (2000) Carbon dynamics and microbial activity in tallgrass prairie exposed to elevated CO<sub>2</sub> for 8 years. *Plant and Soil*, **227**, 127-137.
- Wood CW, Torbert HA, Rogers HH, Runion GB, Prior SA (1994) Free-Air CO<sub>2</sub> Enrichment Effects on Soil Carbon and Nitrogen. *Agricultural and Forest Meteorology*, **70**, 103-116.
- Zak DR, Holmes WE, Pregitzer KS (2007) Atmospheric CO<sub>2</sub> and O<sub>3</sub> alter the flow of <sup>15</sup>N in developing forest ecosystems. *Ecology*, **88**, 2630-2639.
- Zak DR, Pregitzer KS, Curtis PS, Holmes WE (2000a) Atmospheric CO<sub>2</sub> and the composition and function of soil microbial communities. *Ecological Applications*, **10**, 47-59.
- Zak DR, Pregitzer KS, Curtis PS, Teeri JA, Fogel R, Randlett DL (1993) Elevated Atmospheric CO<sub>2</sub> and Feedback between Carbon and Nitrogen Cycles. *Plant and Soil*, **151**, 105-117.
- Zak DR, Pregitzer KS, Curtis PS, Vogel CS, Holmes WE, Lussenhop J (2000b) Atmospheric CO<sub>2</sub>, soil-N availability, and allocation of biomass and nitrogen by *Populus tremuloides*. *Ecological Applications*, **10**, 34-46.
- Zak DR, Pregitzer KS, Kubiske ME, Burton AJ (2011) Forest productivity under elevated CO<sub>2</sub> and O<sub>3</sub>: positive feedbacks to soil N cycling sustain decade-long net primary productivity enhancement by CO<sub>2</sub>. *Ecology Letters*, **14**, 1220-1226.
- Zanetti S, Hartwig UA, Luscher A *et al.* (1996) Stimulation of symbiotic N<sub>2</sub> fixation in *Trifolium repens* L. under elevated atmospheric pCO<sub>2</sub> in a grassland ecosystem. *Plant Physiology*, **112**, 575-583.
- Zeng Q, Liu BA, Gilna B *et al.* (2011) Elevated CO<sub>2</sub> effects on nutrient competition between a C<sub>3</sub> crop (*Oryza sativa* L.) and a C<sub>4</sub> weed (*Echinochloa crusgalli* L.). *Nutrient Cycling in Agroecosystems*, **89**, 93-104.
