# Supplementary material for: Processes regulating progressive nitrogen limitation under elevated carbon dioxide: a meta-analysis
Source: Copernicus journal article supplement (doi:10.5194/bg-13-2689-2016), 2016-05-10
Supplement: Supplementary file 1 [file Database S1.xlsx]

## Sheet: APNP
																	Total									Short-term									Long-term
Reference	Obs	Ambient CO2 (ppm)	Elevated CO2 (ppm)	CO2 difference (ppm)	Treatment duration (years)	Latitude	Longitude	Country	Fercility	Unit	Other treatments	Data location	Notes	Nitrogen addition	Ecosystem	Vegetation	Mean_a	Mean_e	Std_a	Std_e	N_a	N_e	lnR	Var(lnR)		Mean_a	Mean_e	Std_a	Std_e	N_a	N_e	lnR	Var(lnR)		Mean_a	Mean_e	Std_a	Std_e	N_a	N_e	lnR	Var(lnR)
Aranjuelo et al. 2011	1	350	700	350	0.583333	*	*	Canada	GC	g plant-1	No	Table 1 * Fig. 5; SUM of leaf and stem	*	No	Forest	Evergreen Broadleaf	0.299076	0.386595	0.101779	0.0208829	8	8	0.2566	0.0148		0.299076	0.386595	0.101779	0.0208829	8	8	0.2566	0.0148		*	*	*	*	*	*	*	*
Arnone 1999	2	355	680	325	4	46°35' N	8°23' E	Sweden	OTC	g N m-2 land	No	Table 1	*	No	Grassland	*	0.163	0.085	0.322161	0.148956	12	12	-0.6511	0.5817		*	*	*	*	*	*	*	*		0.163	0.085	0.322161	0.148956	12	12	-0.6511	0.5817
Arnone & Gordon 1990	3	350	650	300	0.128767	*	*	USA	GC	mg	Nitrogen	Table 4	*	Yes	Forest	Broadleaf	13.2	19.9	10.5095	6.755	5	3	0.4105	0.1652		13.2	19.9	10.5095	6.755	5	3	0.4105	0.1652		*	*	*	*	*	*	*	*
Arnone & Gordon 1990	4	350	650	300	0.128767	*	*	USA	GC	mg	Nodulation	Table 4	*	No	Forest	Broadleaf	40.4	45.2	3.3541	12.0748	5	5	0.1123	0.0157		40.4	45.2	3.3541	12.0748	5	5	0.1123	0.0157		*	*	*	*	*	*	*	*
Arnone & Gordon 1990	5	350	650	300	0.128767	*	*	USA	GC	mg	Nodulation + Nitrogen	Table 4	*	Yes	Forest	Broadleaf	58.1	83.8	14.0872	33.0938	5	5	0.3663	0.0429		58.1	83.8	14.0872	33.0938	5	5	0.3663	0.0429		*	*	*	*	*	*	*	*
Barnard et al. 2004 (NP)	6	365	665	300	1.25	*	*	*	GC	g N m-2 land	No	Fig.2c	*	No	Grassland	Holcus	3.45124	3.27786	0.380634	0.283288	6	6	-0.0515	0.0033		3.45124	3.27786	0.380634	0.283288	6	6	-0.0515	0.0033		*	*	*	*	*	*	*	*
Barnard et al. 2004 (NP)	7	365	665	300	1.25	*	*	*	GC	g N m-2 land	No	Fig.6c	*	No	Grassland	Festuca	6.13941	4.7319	0.923652	0.446866	6	6	-0.2604	0.0053		6.13941	4.7319	0.923652	0.446866	6	6	-0.2604	0.0053		*	*	*	*	*	*	*	*
Billes et al. 1993	8	350	700	350	0.0767123	*	*	*	GC	mg pot-1	Fertillizer without N	Table 1	*	No	Cropland	Wheat	13.7228	14.103	1.37228	1.4103	4	4	0.0273	0.005		13.7228	14.103	1.37228	1.4103	4	4	0.0273	0.005		*	*	*	*	*	*	*	*
Billes et al. 1993	9	350	700	350	0.0767123	*	*	*	GC	mg pot-1	Fertillizer witht N	Table 1	50 kg N ha-1; from Zak et al. 2000 (New Phytologist; Table 6)	Yes	Cropland	Wheat	20.6514	27.69	2.06514	2.769	4	4	0.2933	0.005		20.6514	27.69	2.06514	2.769	4	4	0.2933	0.005		*	*	*	*	*	*	*	*
Blank & Derner 2004	10	360	699	339	0.25	31°05'N	97°20W	USA	GC	mmol N	No	Table 2 * Table3	High fertility soil	No	Grassland	*	7.6024	5.4094	0.262	0.1048	12	12	-0.3403	0.0001		7.6024	5.4094	0.262	0.1048	12	12	-0.3403	0.0001		*	*	*	*	*	*	*	*
Blank & Derner 2004	11	360	699	339	0.25	31°05'N	97°20W	USA	GC	mmol N	No	Table 2 * Table3	Low fertility soil	No	Grassland	*	1.0998	0.7722	0.08	0.0625	12	12	-0.3536	0.001		1.0998	0.7722	0.08	0.0625	12	12	-0.3536	0.001		*	*	*	*	*	*	*	*
Bloor et al. 2009	12	380	645	265	0.333333	*	*	France	GC	mg	No	Fig. 1; Fraxinus without competition	No COMP	No	Grassland	*	3.52124	3.03475	1.70235	0.624194	6	6	-0.1487	0.046		3.52124	3.03475	1.70235	0.624194	6	6	-0.1487	0.046		*	*	*	*	*	*	*	*
Bloor et al. 2009	13	380	645	265	0.333333	*	*	France	GC	mg	No	Table 1 and Fig. 1; Sum of the two plants	COMP	No	Grassland	*	184.588	167.188	9.01859	12.274	6	6	-0.099	0.0013		184.588	167.188	9.01859	12.274	6	6	-0.099	0.0013		*	*	*	*	*	*	*	*
Bloor et al. 2009	14	380	645	265	0.333333	*	*	France	GC	mg	Nitrogen	Fig. 1; Fraxinus without competition	No COMP	Yes	Grassland	*	4.30888	4.93436	1.53211	1.30513	6	6	0.1355	0.0327		4.30888	4.93436	1.53211	1.30513	6	6	0.1355	0.0327		*	*	*	*	*	*	*	*
Bloor et al. 2009	15	380	645	265	0.333333	*	*	France	GC	mg	Nitrogen	Table 1 and Fig. 1; Sum of the two plants	COMP	Yes	Grassland	*	50.9876	45.7876	5.56497	5.56497	6	6	-0.1076	0.0044		50.9876	45.7876	5.56497	5.56497	6	6	-0.1076	0.0044		*	*	*	*	*	*	*	*
Bradford et al. 2012	16	375	550	175	0.5	*	*	*	GC	g N m-2	No	Table 2	375 ppm vs. 550 ppm	No	Grassland	*	3.7	3.7	0.519615	0.866025	3	3	0	0.0248		3.7	3.7	0.519615	0.866025	3	3	0	0.0248		*	*	*	*	*	*	*	*
Bradford et al. 2012	17	375	550	175	0.5	*	*	*	GC	g N m-2	Low Nitrogen	Table 2	375 ppm vs. 550 ppm	Yes	Grassland	*	5.2	5	0.979796	0.244949	6	6	-0.0392	0.0063		5.2	5	0.979796	0.244949	6	6	-0.0392	0.0063		*	*	*	*	*	*	*	*
Bradford et al. 2012	18	375	550	175	0.5	*	*	*	GC	g N m-2	High Nitrogen	Table 2	375 ppm vs. 550 ppm	Yes	Grassland	*	10.9	9.5	1.46969	1.22474	6	6	-0.1375	0.0058		10.9	9.5	1.46969	1.22474	6	6	-0.1375	0.0058		*	*	*	*	*	*	*	*
Bradford et al. 2012	19	375	700	325	0.5	*	*	*	GC	g N m-2	No	Table 2	375 ppm vs. 700 ppm	No	Grassland	*	3.7	4	0.519615	0.34641	3	3	0.078	0.0091		3.7	4	0.519615	0.34641	3	3	0.078	0.0091		*	*	*	*	*	*	*	*
Bradford et al. 2012	20	375	700	325	0.5	*	*	*	GC	g N m-2	Low Nitrogen	Table 2	375 ppm vs. 700 ppm	Yes	Grassland	*	5.2	5.8	0.979796	1.46969	6	6	0.1092	0.0166		5.2	5.8	0.979796	1.46969	6	6	0.1092	0.0166		*	*	*	*	*	*	*	*
Bradford et al. 2012	21	375	700	325	0.5	*	*	*	GC	g N m-2	High Nitrogen	Table 2	375 ppm vs. 700 ppm	Yes	Grassland	*	10.9	9.2	1.46969	0.979796	6	6	-0.1696	0.0049		10.9	9.2	1.46969	0.979796	6	6	-0.1696	0.0049		*	*	*	*	*	*	*	*
Calfapietra et al. 2007	22	370	550	180	3	42°37'N	11°51'E	Italy	FACE	g N m-2 land	No	Fig. 1	*	No	Forest	Sum of different species	154	157	4.24264	5.19615	3	3	0.0193	0.0006		154	157	4.24264	5.19615	3	3	0.0193	0.0006		*	*	*	*	*	*	*	*
Daepp et al. 2001	23	350	600	250	2	47°27'N	8°41'E	Switzerland	FACE	g m-2	Nitrogen	Fig. 2	Nitrogen level 1; different experiment from Daepp et al. 2000	Yes	Grassland	Lolium perenne; Vegetative + reproductive	8.04878	7.68293	0.804878	0.768293	6	6	-0.0465	0.0033		8.04878	7.68293	0.804878	0.768293	6	6	-0.0465	0.0033		*	*	*	*	*	*	*	*
Daepp et al. 2001	24	350	600	250	2	47°27'N	8°41'E	Switzerland	FACE	g m-2	Nitrogen	Fig. 2	Nitrogen level 2; different experiment from Daepp et al. 2000	Yes	Grassland	Lolium perenne; Vegetative + reproductive	15.1829	16.6463	1.51829	1.66463	6	6	0.092	0.0033		15.1829	16.6463	1.51829	1.66463	6	6	0.092	0.0033		*	*	*	*	*	*	*	*
Daepp et al. 2001	25	350	600	250	2	47°27'N	8°41'E	Switzerland	FACE	g m-2	Nitrogen	Fig. 2	Nitrogen level 3; different experiment from Daepp et al. 2000	Yes	Grassland	Lolium perenne; Vegetative + reproductive	19.0244	23.4146	1.90244	2.34146	6	6	0.2076	0.0033		19.0244	23.4146	1.90244	2.34146	6	6	0.2076	0.0033		*	*	*	*	*	*	*	*
Daepp et al. 2000	26	350	600	250	6	47°27'N	8°41'E	Switzerland	FACE	g m-2	Nitrogen	Table 2; Sum of yeild and stubble	Low N; different experiment from Daepp et al. 2001	Yes	Grassland	Lolium perenne	91.2	74.7	9.12	7.47	6	6	-0.1996	0.0033		*	*	*	*	*	*	*	*		91.2	74.7	9.12	7.47	6	6	-0.1996	0.0033
Daepp et al. 2000	27	350	600	250	6	47°27'N	8°41'E	Switzerland	FACE	g m-2	Nitrogen	Table 2; Sum of yeild and stubble	High N; different experiment from Daepp et al. 2001	Yes	Grassland	Lolium perenne	283.6	268.8	28.36	26.88	6	6	-0.0536	0.0033		*	*	*	*	*	*	*	*		283.6	268.8	28.36	26.88	6	6	-0.0536	0.0033
Dakora & Drake 2000	28	364	660	296	0.333333	38°51' N	75°36' W	USA	OTC	mg plant-1	No	Fig. 1	Sediment material	No	Grassland	Spartina	0.943396	1.13208	0.154056	0.308112	6	6	0.1823	0.0168		0.943396	1.13208	0.154056	0.308112	6	6	0.1823	0.0168		*	*	*	*	*	*	*	*
Dakora & Drake 2000	29	364	665	301	0.333333	38°51' N	75°36' W	USA	OTC	mg plant-1	No	Fig. 1	Sediment material	No	Grassland	Scirpus	9.49686	7.79874	2.61895	2.61895	6	6	-0.197	0.0315		9.49686	7.79874	2.61895	2.61895	6	6	-0.197	0.0315		*	*	*	*	*	*	*	*
Dakora & Drake 2000	30	364	660	296	0.333333	38°51' N	75°36' W	USA	OTC	mg plant-1	No	Fig. 5	Sediment-free material	No	Grassland	Spartina	0.6	0.771429	0.209956	0	6	6	0.2513	0.0204		0.6	0.771429	0.209956	0	6	6	0.2513	0.0204		*	*	*	*	*	*	*	*
Dakora & Drake 2000	31	364	665	301	0.333333	38°51' N	75°36' W	USA	OTC	mg plant-1	No	Fig. 5	Sediment-free material	No	Grassland	Scirpus	9.77143	6.25714	3.14934	1.88961	6	6	-0.4457	0.0325		9.77143	6.25714	3.14934	1.88961	6	6	-0.4457	0.0325		*	*	*	*	*	*	*	*
de Graaff et al. 2009	32	392	792	400	0.0876712	*	*	USA	GC	mg plant-1	No	Fig. 3a	Wild	No	Cropland	Wheat	4.83429	4.97143	0.118769	1.18769	3	3	0.028	0.0192		4.83429	4.97143	0.118769	1.18769	3	3	0.028	0.0192		*	*	*	*	*	*	*	*
de Graaff et al. 2009	33	392	792	400	0.0876712	*	*	USA	GC	mg plant-1	No	Fig. 3a	Cultivated	No	Cropland	Wheat	4.56	5.28	0.296923	0.0593846	3	3	0.1466	0.0015		4.56	5.28	0.296923	0.0593846	3	3	0.1466	0.0015		*	*	*	*	*	*	*	*
Dijkstra et al. 2010 (FE)	34	400	780	380	0.230137	40°50' N	104°47' W	USA	GC	g pot-1	Low water	Fig. 3; average of species to calculate BNP	Monocultures	No	Grassland	average of five species	0.200385	0.176154	0.0255095	0.0242257	10	10	-0.1287	0.0035		0.200385	0.176154	0.0255095	0.0242257	10	10	-0.1287	0.0035		*	*	*	*	*	*	*	*
Dijkstra et al. 2010 (FE)	35	400	780	380	0.230137	40°50' N	104°47' W	USA	GC	g pot-1	High water	Fig. 3; average of species to calculate BNP	Monocultures	No	Grassland	average of five species	0.215385	0.215	0.0215235	0.0180944	10	10	-0.0019	0.0017		0.215385	0.215	0.0215235	0.0180944	10	10	-0.0019	0.0017		*	*	*	*	*	*	*	*
Dijkstra et al. 2010 (FE)	36	400	780	380	0.230137	40°50' N	104°47' W	USA	GC	g pot-1	Low water	Fig. 3; sum of species	Mixtures	No	Grassland	average of five species	0.202308	0.143846	0.0279211	0.0170276	10	10	-0.3413	0.0033		0.202308	0.143846	0.0279211	0.0170276	10	10	-0.3413	0.0033		*	*	*	*	*	*	*	*
Dijkstra et al. 2010 (FE)	37	400	780	380	0.230137	40°50' N	104°47' W	USA	GC	g pot-1	High water	Fig. 3; sum of species	Mixtures	No	Grassland	average of five species	0.192308	0.183846	0.0318326	0.0215522	10	10	-0.0452	0.0041		0.192308	0.183846	0.0318326	0.0215522	10	10	-0.0452	0.0041		*	*	*	*	*	*	*	*
Dijkstra et al. 2010 (NP)	38	*	600	*	3	41°11' N	104°54' W	USA	FACE	g m-2	No	Fig. 3	*	No	Grassland	northern mixed-grass prairie	1.51713	1.38629	0.0757611	0.127035	5	5	-0.0902	0.0022		1.51713	1.38629	0.0757611	0.127035	5	5	-0.0902	0.0022		*	*	*	*	*	*	*	*
Dijkstra et al. 2010 (NP)	39	*	600	*	3	41°11' N	104°54' W	USA	FACE	g m-2	Warming	Fig. 3	*	No	Grassland	northern mixed-grass prairie	1.49533	1.40654	0.224645	0.172046	5	5	-0.0612	0.0075		1.49533	1.40654	0.224645	0.172046	5	5	-0.0612	0.0075		*	*	*	*	*	*	*	*
Franzaring et al. 2012	40	380	550	170	0.389041	*	*	Germany	GC	g plant-1	No	Fig. 3 (a+b+c)	0 g N	No	*	*	0.205321	0.208284	0.0205321	0.0208284	6	6	0.0145	0.0033		0.205321	0.208284	0.0205321	0.0208284	6	6	0.0145	0.0033		*	*	*	*	*	*	*	*
Franzaring et al. 2012	41	380	550	170	0.389041	*	*	Germany	GC	g plant-1	Nitrogen	Fig. 3 (a+b+c)	75 kg N ha-1 yr-1	Yes	*	*	0.318307	0.312412	0.0318307	0.0312412	6	6	-0.0187	0.0033		0.318307	0.312412	0.0318307	0.0312412	6	6	-0.0187	0.0033		*	*	*	*	*	*	*	*
Gill et al. 2006	42	275	455	180	4	31°05' N	97°20' W	USA	GC	g N m-2 land	No	Fig. 1a	*	No	Grassland	Grass	6.28968	11.5079	1.3878	2.1347	10	10	0.6041	0.0083		6.19048	10.291	1.53372	2.35896	10	10	0.5083	0.0114		6.5873	15.1587	3.26267	5.01949	10	10	0.8334	0.0355
Gutierrez et al. 2013	43	370	700	330	0.416667	40°95' N	5°5' W	Spain	OTC	mg plant-1	Nitrogen	Table 4	77.5 kg N ha-1 yr-1	Yes	Cropland	Wheat	37.9	39.9	3.79	3.99	3	3	0.0514	0.0067		37.9	39.9	3.79	3.99	3	3	0.0514	0.0067		*	*	*	*	*	*	*	*
Hartwig et al. 2002	44	350	600	250	4	47°27'N	8°41'E	Switzerland	FACE	g N m-2 land	Low Nitrogen	Table 1 * Table 2; yield + stubble	DM*N concentration	Yes	Grassland	Lolium perenne	9.4954	8.5706	0.94954	0.85706	3	3	-0.1025	0.0067		*	*	*	*	*	*	*	*		9.4954	8.5706	0.94954	0.85706	3	3	-0.1025	0.0067
Hartwig et al. 2002	45	350	600	250	4	47°27'N	8°41'E	Switzerland	FACE	g N m-2 land	Low Nitrogen	Table 1 * Table 2; yield + stubble	DM*N concentration	Yes	Grassland	Trifolium repens	26.2824	37.3974	2.62824	3.73974	3	3	0.3527	0.0067		*	*	*	*	*	*	*	*		26.2824	37.3974	2.62824	3.73974	3	3	0.3527	0.0067
Hartwig et al. 2002	46	350	600	250	4	47°27'N	8°41'E	Switzerland	FACE	g N m-2 land	High Nitrogen	Table 1 * Table 2; yield + stubble	DM*N concentration	Yes	Grassland	Lolium perenne	29.8533	23.1876	2.98533	2.31876	3	3	-0.2527	0.0067		*	*	*	*	*	*	*	*		29.8533	23.1876	2.98533	2.31876	3	3	-0.2527	0.0067
Hartwig et al. 2002	47	350	600	250	4	47°27'N	8°41'E	Switzerland	FACE	g N m-2 land	High Nitrogen	Table 1 * Table 2; yield + stubble	DM*N concentration	Yes	Grassland	Trifolium repens	23.3204	37.4191	2.33204	3.74191	3	3	0.4729	0.0067		*	*	*	*	*	*	*	*		23.3204	37.4191	2.33204	3.74191	3	3	0.4729	0.0067
Hibbs et al. 1995	48	350	700	350	0.40274	*	*	USA	GC	mg	No	Table 2	*	No	Forest	Deciduous	1.08	1.72	0.108	0.172	16	16	0.4654	0.0012		1.08	1.72	0.108	0.172	16	16	0.4654	0.0012		*	*	*	*	*	*	*	*
Hibbs et al. 1995	49	350	700	350	0.40274	*	*	USA	GC	mg	Drought	Table 2	*	No	Forest	Deciduous	1.51	1.78	0.151	0.178	16	16	0.1645	0.0012		1.51	1.78	0.151	0.178	16	16	0.1645	0.0012		*	*	*	*	*	*	*	*
Hungate et al. 1996	50	360	710	350	0.416667	37°24' N	122°13' W	USA	OTC	g N m-2 land	No	Fig. 1	*	No	Grassland	Avena fatua	0.557377	0.803279	0.183284	0.366569	5	5	0.3654	0.0633		0.557377	0.803279	0.183284	0.366569	5	5	0.3654	0.0633		*	*	*	*	*	*	*	*
Hungate et al. 1996	51	360	710	350	0.416667	37°24' N	122°13' W	USA	OTC	g N m-2 land	No	Fig. 1	*	No	Grassland	Bromus hordeaceus	0.295082	0.319672	0.0733137	0.0733137	5	5	0.0801	0.0229		0.295082	0.319672	0.0733137	0.0733137	5	5	0.0801	0.0229		*	*	*	*	*	*	*	*
Hungate et al. 1996	52	360	710	350	0.416667	37°24' N	122°13' W	USA	OTC	g N m-2 land	No	Fig. 1	*	No	Grassland	Lolium multiflorum	0.352459	0.336066	0.109971	0.128299	5	5	-0.0476	0.0486		0.352459	0.336066	0.109971	0.128299	5	5	-0.0476	0.0486		*	*	*	*	*	*	*	*
Hungate et al. 1996	53	360	710	350	0.416667	37°24' N	122°13' W	USA	OTC	g N m-2 land	No	Fig. 1	*	No	Grassland	Vulpia michrostachys	0.5	0.245902	0.23827	0.128299	5	5	-0.7097	0.0999		0.5	0.245902	0.23827	0.128299	5	5	-0.7097	0.0999		*	*	*	*	*	*	*	*
Hungate et al. 1996	54	360	710	350	0.416667	37°24' N	122°13' W	USA	OTC	g N m-2 land	No	Fig. 1	*	No	Grassland	Lasthenia californica	0.319672	0.344262	0.109971	0.128299	5	5	0.0741	0.0514		0.319672	0.344262	0.109971	0.128299	5	5	0.0741	0.0514		*	*	*	*	*	*	*	*
Hungate et al. 1996	55	360	710	350	0.416667	37°24' N	122°13' W	USA	OTC	g N m-2 land	No	Fig. 1	*	No	Grassland	Plantago erecta	0.737705	0.57377	0.201613	0.128299	5	5	-0.2513	0.0249		0.737705	0.57377	0.201613	0.128299	5	5	-0.2513	0.0249		*	*	*	*	*	*	*	*
Hungate et al. 1996	56	360	710	350	0.416667	37°24' N	122°13' W	USA	OTC	g N m-2 land	Fertilizer	Fig. 1	*	Yes	Grassland	Avena fatua	6.06557	7.04918	2.01613	1.64956	5	5	0.1503	0.033		6.06557	7.04918	2.01613	1.64956	5	5	0.1503	0.033		*	*	*	*	*	*	*	*
Hungate et al. 1996	57	360	710	350	0.416667	37°24' N	122°13' W	USA	OTC	g N m-2 land	Fertilizer	Fig. 1	*	Yes	Grassland	Bromus hordeaceus	1.72131	3.60656	0.733137	1.64956	5	5	0.7397	0.0781		1.72131	3.60656	0.733137	1.64956	5	5	0.7397	0.0781		*	*	*	*	*	*	*	*
Hungate et al. 1996	58	360	710	350	0.416667	37°24' N	122°13' W	USA	OTC	g N m-2 land	Fertilizer	Fig. 1	*	Yes	Grassland	Lolium multiflorum	3.03279	3.19672	0.549853	1.28299	5	5	0.0526	0.0388		3.03279	3.19672	0.549853	1.28299	5	5	0.0526	0.0388		*	*	*	*	*	*	*	*
Hungate et al. 1996	59	360	710	350	0.416667	37°24' N	122°13' W	USA	OTC	g N m-2 land	Fertilizer	Fig. 1	*	Yes	Grassland	Vulpia michrostachys	2.86885	2.62295	0.733137	1.64956	5	5	-0.0896	0.0922		2.86885	2.62295	0.733137	1.64956	5	5	-0.0896	0.0922		*	*	*	*	*	*	*	*
Hungate et al. 1996	60	360	710	350	0.416667	37°24' N	122°13' W	USA	OTC	g N m-2 land	Fertilizer	Fig. 1	*	Yes	Grassland	Lasthenia californica	5	4.5082	1.46627	1.83284	5	5	-0.1035	0.0503		5	4.5082	1.46627	1.83284	5	5	-0.1035	0.0503		*	*	*	*	*	*	*	*
Hungate et al. 1996	61	360	710	350	0.416667	37°24' N	122°13' W	USA	OTC	g N m-2 land	Fertilizer	Fig. 1	*	Yes	Grassland	Plantago erecta	6.14754	4.5082	1.83284	1.46627	5	5	-0.3101	0.0389		6.14754	4.5082	1.83284	1.46627	5	5	-0.3101	0.0389		*	*	*	*	*	*	*	*
Hungate et al. 1997 (Oecologia)	62	360	710	350	1	37°24' N	122°13' W	USA	OTC	g N m-2 land	No	Table 2	Serpentine ecosystem	No	Grassland	*	1.85	2.73	0.537587	1.32816	10	10	0.3891	0.0321		1.85	2.73	0.537587	1.32816	10	10	0.3891	0.0321		*	*	*	*	*	*	*	*
Hungate et al. 1997 (Oecologia)	63	360	710	350	1	37°24' N	122°13' W	USA	OTC	g N m-2 land	No	Table 2	Sandstone ecosystem	No	Grassland	*	2.1	3.18	0.56921	1.07517	10	10	0.4149	0.0188		2.1	3.18	0.56921	1.07517	10	10	0.4149	0.0188		*	*	*	*	*	*	*	*
Hungate et al. 2006	64	350	686	336	7	28°38' N	80°42' W	USA	OTC	g N m-2 land	No	Table 3	*	No	Forest	*	4.17817	5.44833	0.623754	0.682471	8	8	0.2654	0.0047		2.00733	2.924	0.5048	0.629237	8	8	0.3762	0.0137		5.04825	6.388	0.8723	0.929443	8	8	0.2354	0.0064
Jin et al. 2012	65	350	550	200	0.172603	36°42' N	142°11' W	Australia	FACE	mg plant-1	No	Fig. 1a * Table 2	0 mg P kg-1 soil	No	Cropland	Chickpea	7.43514	7.91757	0.743514	0.791757	4	4	0.0629	0.005		7.43514	7.91757	0.743514	0.791757	4	4	0.0629	0.005		*	*	*	*	*	*	*	*
Jin et al. 2012	66	350	550	200	0.172603	36°42' N	142°11' W	Australia	FACE	mg plant-1	Phosphorus	Fig. 1a * Table 2	2 mg P kg-1 soil	No	Cropland	Chickpea	12.0324	15.9061	1.20324	1.59061	4	4	0.2791	0.005		12.0324	15.9061	1.20324	1.59061	4	4	0.2791	0.005		*	*	*	*	*	*	*	*
Jin et al. 2012	67	350	550	200	0.172603	36°42' N	142°11' W	Australia	FACE	mg plant-1	Phosphorus	Fig. 1a * Table 2	4 mg P kg-1 soil	No	Cropland	Chickpea	15.3243	20.25	1.53243	2.025	4	4	0.2787	0.005		15.3243	20.25	1.53243	2.025	4	4	0.2787	0.005		*	*	*	*	*	*	*	*
Jin et al. 2012	68	350	550	200	0.172603	36°42' N	142°11' W	Australia	FACE	mg plant-1	Phosphorus	Fig. 1a * Table 2	8 mg P kg-1 soil	No	Cropland	Chickpea	21.9122	34.7351	2.19122	3.47351	4	4	0.4607	0.005		21.9122	34.7351	2.19122	3.47351	4	4	0.4607	0.005		*	*	*	*	*	*	*	*
Jin et al. 2012	69	350	550	200	0.172603	36°42' N	142°11' W	Australia	FACE	mg plant-1	Phosphorus	Fig. 1a * Table 2	16 mg P kg-1 soil	No	Cropland	Chickpea	34.1514	44.7507	3.41514	4.47507	4	4	0.2703	0.005		34.1514	44.7507	3.41514	4.47507	4	4	0.2703	0.005		*	*	*	*	*	*	*	*
Jin et al. 2012	70	350	550	200	0.172603	36°42' N	142°11' W	Australia	FACE	mg plant-1	No	Fig. 1a * Table 2	0 mg P kg-1 soil	No	Cropland	Field pea	12.5878	15.2514	1.25878	1.52514	4	4	0.1919	0.005		12.5878	15.2514	1.25878	1.52514	4	4	0.1919	0.005		*	*	*	*	*	*	*	*
Jin et al. 2012	71	350	550	200	0.172603	36°42' N	142°11' W	Australia	FACE	mg plant-1	Phosphorus	Fig. 1a * Table 2	2 mg P kg-1 soil	No	Cropland	Field pea	28.3135	30.1155	2.83135	3.01155	4	4	0.0617	0.005		28.3135	30.1155	2.83135	3.01155	4	4	0.0617	0.005		*	*	*	*	*	*	*	*
Jin et al. 2012	72	350	550	200	0.172603	36°42' N	142°11' W	Australia	FACE	mg plant-1	Phosphorus	Fig. 1a * Table 2	4 mg P kg-1 soil	No	Cropland	Field pea	30.1014	34.2811	3.01014	3.42811	4	4	0.13	0.005		30.1014	34.2811	3.01014	3.42811	4	4	0.13	0.005		*	*	*	*	*	*	*	*
Jin et al. 2012	73	350	550	200	0.172603	36°42' N	142°11' W	Australia	FACE	mg plant-1	Phosphorus	Fig. 1a * Table 2	8 mg P kg-1 soil	No	Cropland	Field pea	46.1453	50.5419	4.61453	5.05419	4	4	0.091	0.005		46.1453	50.5419	4.61453	5.05419	4	4	0.091	0.005		*	*	*	*	*	*	*	*
Jin et al. 2012	74	350	550	200	0.172603	36°42' N	142°11' W	Australia	FACE	mg plant-1	Phosphorus	Fig. 1a * Table 2	16 mg P kg-1 soil	No	Cropland	Field pea	59.3027	64.4047	5.93027	6.44047	4	4	0.0825	0.005		59.3027	64.4047	5.93027	6.44047	4	4	0.0825	0.005		*	*	*	*	*	*	*	*
Johnson et al. 2004	75	*	542	*	2	35°54' N	84°20' W	USA	FACE	kg N ha-1 land	No	Table 2; sum of leaf and woody	*	No	Forest	*	240	232	24	23.2	3	2	-0.0339	0.0083		240	232	24	23.2	3	2	-0.0339	0.0083		*	*	*	*	*	*	*	*
Kettunen et al. 2005	76	360	720	360	0.333333	*	*	*	GC	g N m-2 land	Fertilizer	Fig. 4; average across harvests	2g N m-2	Yes	Grassland	Phleum pratense	4.66621	3.75337	0.558023	0.408598	6	6	-0.2177	0.0044		4.66621	3.75337	0.558023	0.408598	6	6	-0.2177	0.0044		*	*	*	*	*	*	*	*
Kettunen et al. 2005	77	360	720	360	0.333333	*	*	*	GC	g N m-2 land	Fertilizer	Fig. 4; average across harvests	6g N m-2	Yes	Grassland	Phleum pratense	6.40619	5.80869	0.939792	0.671945	6	6	-0.0979	0.0058		6.40619	5.80869	0.939792	0.671945	6	6	-0.0979	0.0058		*	*	*	*	*	*	*	*
Kettunen et al. 2005	78	360	720	360	0.333333	*	*	*	GC	g N m-2 land	Fertilizer	Fig. 4; average across harvests	10g N m-2	Yes	Grassland	Phleum pratense	9.2172	8.00118	0.950157	0.426157	6	6	-0.1415	0.0022		9.2172	8.00118	0.950157	0.426157	6	6	-0.1415	0.0022		*	*	*	*	*	*	*	*
Kettunen et al. 2007	79	360	720	360	0.383562	*	*	*	GC	g N m-2 land	Fertilizer	Fig. 1; Average across harvests and species	5g N m-2	Yes	Grassland	P. pratense + T. pratense	6.73418	7.8481	0.953805	1.0154	9	9	0.1531	0.0041		6.73418	7.8481	0.953805	1.0154	9	9	0.1531	0.0041		*	*	*	*	*	*	*	*
Kettunen et al. 2007	80	360	720	360	0.383562	*	*	*	GC	g N m-2 land	Fertilizer	Fig. 1; Average across harvests and species	10g N m-2	Yes	Grassland	P. pratense + T. pratense	8.26582	9.43038	0.705962	0.855424	9	9	0.1318	0.0017		8.26582	9.43038	0.705962	0.855424	9	9	0.1318	0.0017		*	*	*	*	*	*	*	*
Kim et al. 2011	81	380	622	242	0.30137	35°10' N	126°53' E	South_Korea	GC	mg N pot-2	Fertilizer	Table 4	*	Yes	Cropland	Rice	508	523.5	50.8	52.35	6	6	0.0301	0.0033		508	523.5	50.8	52.35	6	6	0.0301	0.0033		*	*	*	*	*	*	*	*
Kim et al. 2011	82	380	622	242	0.30137	35°10' N	126°53' E	South_Korea	GC	mg N pot-2	Fertilizer + Temperature	Table 4	*	Yes	Cropland	Rice	525.3	540.6	52.53	54.06	6	6	0.0287	0.0033		525.3	540.6	52.53	54.06	6	6	0.0287	0.0033		*	*	*	*	*	*	*	*
Lam et al. 2012 (NCA)	83	390	550	160	0.333333	36°42' S	142°07' E	Australia	FACE	kg ha-1	Nitrogen	Fig. 3	*	Yes	Cropland	Wheat	116.266	146.334	11.6266	14.6334	4	4	0.23	0.005		116.266	146.334	11.6266	14.6334	4	4	0.23	0.005		*	*	*	*	*	*	*	*
Lam et al. 2012 (NCA)	84	390	550	160	0.333333	36°42' S	142°07' E	Australia	FACE	kg ha-1	Nitrogen + Irrigation	Fig. 3	*	Yes	Cropland	Wheat	165.378	173.969	16.5378	17.3969	4	4	0.0506	0.005		165.378	173.969	16.5378	17.3969	4	4	0.0506	0.005		*	*	*	*	*	*	*	*
Lam et al. 2012 (CPS)	85	390	700	310	0.342466	36°43' S	142°10' E	Australia	GC	mg pot-1	No	Fig. 1	Experiment 1	No	Cropland	Chickpea	95.7529	95.7529	9.57529	9.57529	4	4	0	0.005		95.7529	95.7529	9.57529	9.57529	4	4	0	0.005		*	*	*	*	*	*	*	*
Lam et al. 2012 (CPS)	86	390	700	310	0.342466	36°43' S	142°10' E	Australia	GC	mg pot-1	Phosphorus	Fig. 1	Experiment 1	No	Cropland	Chickpea	228.571	270.27	22.8571	27.027	4	4	0.1676	0.005		228.571	270.27	22.8571	27.027	4	4	0.1676	0.005		*	*	*	*	*	*	*	*
Lam et al. 2012 (CPS)	87	390	700	310	0.342466	36°43' S	142°10' E	Australia	GC	mg pot-1	No	Fig. 1	Experiment 1	No	Cropland	Field pea	98.8417	114.286	9.88417	11.4286	4	4	0.1452	0.005		98.8417	114.286	9.88417	11.4286	4	4	0.1452	0.005		*	*	*	*	*	*	*	*
Lam et al. 2012 (CPS)	88	390	700	310	0.342466	36°43' S	142°10' E	Australia	GC	mg pot-1	Phosphorus	Fig. 1	Experiment 1	No	Cropland	Field pea	301.158	373.745	30.1158	37.3745	4	4	0.2159	0.005		301.158	373.745	30.1158	37.3745	4	4	0.2159	0.005		*	*	*	*	*	*	*	*
Lam et al. 2012 (CPS)	89	390	700	310	0.342466	36°43' S	142°10' E	Australia	GC	mg pot-1	No	Table 4	Experiment 2; Vertosol	No	Cropland	Chickpea	23.1	34	2.31	3.4	4	4	0.3865	0.005		23.1	34	2.31	3.4	4	4	0.3865	0.005		*	*	*	*	*	*	*	*
Lam et al. 2012 (CPS)	90	390	700	310	0.342466	36°43' S	142°10' E	Australia	GC	mg pot-1	Phosphorus	Table 4	Experiment 2; Vertosol	No	Cropland	Chickpea	33.5	53.6	3.35	5.36	4	4	0.47	0.005		33.5	53.6	3.35	5.36	4	4	0.47	0.005		*	*	*	*	*	*	*	*
Lam et al. 2012 (CPS)	91	390	700	310	0.342466	36°43' S	142°10' E	Australia	GC	mg pot-1	No	Table 4	Experiment 2; Calcarosol	No	Cropland	Chickpea	61	83.6	6.1	8.36	4	4	0.3152	0.005		61	83.6	6.1	8.36	4	4	0.3152	0.005		*	*	*	*	*	*	*	*
Lam et al. 2012 (CPS)	92	390	700	310	0.342466	36°43' S	142°10' E	Australia	GC	mg pot-1	Phosphorus	Table 4	Experiment 2; Calcarosol	No	Cropland	Chickpea	74.5	86.9	7.45	8.69	4	4	0.154	0.005		74.5	86.9	7.45	8.69	4	4	0.154	0.005		*	*	*	*	*	*	*	*
Lam et al. 2012 (CPS)	93	390	700	310	0.342466	36°43' S	142°10' E	Australia	GC	mg pot-1	No	Table 4	Experiment 2; Vertosol	No	Cropland	Field pea	33	45	3.3	4.5	4	4	0.3102	0.005		33	45	3.3	4.5	4	4	0.3102	0.005		*	*	*	*	*	*	*	*
Lam et al. 2012 (CPS)	94	390	700	310	0.342466	36°43' S	142°10' E	Australia	GC	mg pot-1	Phosphorus	Table 4	Experiment 2; Vertosol	No	Cropland	Field pea	59.9	78.1	5.99	7.81	4	4	0.2653	0.005		59.9	78.1	5.99	7.81	4	4	0.2653	0.005		*	*	*	*	*	*	*	*
Lam et al. 2012 (CPS)	95	390	700	310	0.342466	36°43' S	142°10' E	Australia	GC	mg pot-1	No	Table 4	Experiment 2; Calcarosol	No	Cropland	Field pea	66.8	84.7	6.68	8.47	4	4	0.2374	0.005		66.8	84.7	6.68	8.47	4	4	0.2374	0.005		*	*	*	*	*	*	*	*
Lam et al. 2012 (CPS)	96	390	700	310	0.342466	36°43' S	142°10' E	Australia	GC	mg pot-1	Phosphorus	Table 4	Experiment 2; Calcarosol	No	Cropland	Field pea	79.9	110	7.99	11	4	4	0.3197	0.005		79.9	110	7.99	11	4	4	0.3197	0.005		*	*	*	*	*	*	*	*
Lam et al. 2012 (CPS)	97	390	700	310	0.342466	36°43' S	142°10' E	Australia	GC	mg pot-1	No	Table 4	Experiment 2; Vertosol	No	Cropland	Barrel medic	22.9	31	2.29	3.1	4	4	0.3029	0.005		22.9	31	2.29	3.1	4	4	0.3029	0.005		*	*	*	*	*	*	*	*
Lam et al. 2012 (CPS)	98	390	700	310	0.342466	36°43' S	142°10' E	Australia	GC	mg pot-1	Phosphorus	Table 4	Experiment 2; Vertosol	No	Cropland	Barrel medic	51	87.4	5.1	8.74	4	4	0.5387	0.005		51	87.4	5.1	8.74	4	4	0.5387	0.005		*	*	*	*	*	*	*	*
Lam et al. 2012 (CPS)	99	390	700	310	0.342466	36°43' S	142°10' E	Australia	GC	mg pot-1	No	Table 4	Experiment 2; Calcarosol	No	Cropland	Barrel medic	56.2	85.3	5.62	8.53	4	4	0.4173	0.005		56.2	85.3	5.62	8.53	4	4	0.4173	0.005		*	*	*	*	*	*	*	*
Lam et al. 2012 (CPS)	100	390	700	310	0.342466	36°43' S	142°10' E	Australia	GC	mg pot-1	Phosphorus	Table 4	Experiment 2; Calcarosol	No	Cropland	Barrel medic	70.5	103.5	7.05	10.35	4	4	0.384	0.005		70.5	103.5	7.05	10.35	4	4	0.384	0.005		*	*	*	*	*	*	*	*
Lam et al. 2012 (BFS)	101	415	550	135	0.333333	40°10' N	116°14' E	China	FACE	kg ha-1	Fertilizer	Table 1; Zhonghua 13	4.8 kg N ha-1 yr-1	Yes	Cropland	Soybean	283	349	38.1051	27.7128	3	3	0.2096	0.0081		283	349	38.1051	27.7128	3	3	0.2096	0.0081		*	*	*	*	*	*	*	*
Lam et al. 2012 (BFS)	102	415	550	135	0.333333	40°10' N	116°14' E	China	FACE	kg ha-1	Fertilizer	Table 1; Zhonghua 35	4.8 kg N ha-1 yr-1	Yes	Cropland	Soybean	249	295	51.9615	27.7128	3	3	0.1695	0.0175		249	295	51.9615	27.7128	3	3	0.1695	0.0175		*	*	*	*	*	*	*	*
Lam et al. 2013 (PS)	103	390	700	310	0.666667	36°43' S	142°10' E	Australia	GC	mg pot-1	No	Table 1 - Table 2	*	No	Cropland	Field pea	417.18	520.08	41.718	52.008	2	2	0.2205	0.01		417.18	520.08	41.718	52.008	2	2	0.2205	0.01		*	*	*	*	*	*	*	*
Lam et al. 2013 (PS_2)	104	390	700	310	0.416667	36°43' S	142°10' E	Australia	GC	mg pot-1	No	Table 4	cereal-legume soil	No	Cropland	wheat	81.6	82.7	4.04969	3.44093	4	4	0.0134	0.001		81.6	82.7	4.04969	3.44093	4	4	0.0134	0.001		*	*	*	*	*	*	*	*
Lam et al. 2013 (PS_2)	105	390	700	310	0.416667	36°43' S	142°10' E	Australia	GC	mg pot-1	Residue	Table 4	cereal-legume soil	No	Cropland	wheat	67.4	60.9	2.50599	3.86264	4	4	-0.1014	0.0014		67.4	60.9	2.50599	3.86264	4	4	-0.1014	0.0014		*	*	*	*	*	*	*	*
Lam et al. 2013 (PS_2)	106	390	700	310	0.416667	36°43' S	142°10' E	Australia	GC	mg pot-1	No	Table 4	cereal-fallow soil	No	Cropland	wheat	71	74.7	3.67696	2.66833	4	4	0.0508	0.001		71	74.7	3.67696	2.66833	4	4	0.0508	0.001		*	*	*	*	*	*	*	*
Lam et al. 2013 (PS_2)	107	390	700	310	0.416667	36°43' S	142°10' E	Australia	GC	mg pot-1	Residue	Table 4	cereal-fallow soil	No	Cropland	wheat	59.2	49.9	5.65685	2.88444	4	4	-0.1709	0.0031		59.2	49.9	5.65685	2.88444	4	4	-0.1709	0.0031		*	*	*	*	*	*	*	*
Larsen et al. 2011	108	350	510	160	2	55°53'N	11°58'E	Denmark	FACE	g N m-2	No	Table 2	Sum of species	No	Heathland	*	4.097	3.497	1.35389	1.10662	6	6	-0.1583	0.0349		4.097	3.497	1.35389	1.10662	6	6	-0.1583	0.0349		*	*	*	*	*	*	*	*
Larsen et al. 2011	109	350	510	160	2	55°53'N	11°58'E	Denmark	FACE	g N m-2	Drought	Table 2	Sum of species	No	Heathland	*	13.17	9.61	4.48798	3.88142	6	6	-0.3151	0.0465		13.17	9.61	4.48798	3.88142	6	6	-0.3151	0.0465		*	*	*	*	*	*	*	*
Larsen et al. 2011	110	350	510	160	2	55°53'N	11°58'E	Denmark	FACE	g N m-2	Warming	Table 2	Sum of species	No	Heathland	*	11.77	11.51	4.44196	3.91857	6	6	-0.0223	0.0431		11.77	11.51	4.44196	3.91857	6	6	-0.0223	0.0431		*	*	*	*	*	*	*	*
Larsen et al. 2011	111	350	510	160	2	55°53'N	11°58'E	Denmark	FACE	g N m-2	Warming + Drought	Table 2	Sum of species	No	Heathland	*	10.15	8.49	3.65934	3.65869	6	6	-0.1786	0.0526		10.15	8.49	3.65934	3.65869	6	6	-0.1786	0.0526		*	*	*	*	*	*	*	*
Mikan et al. 2000	112	367	715	348	2	45°34' N	84°40' W	USA	OTC	g N m-2	Nitrogen	Table 1 * Table 3	20 mg N; Low-N soil	Yes	Forest	P. tremuloides	2.759	2.7521	0.501168	0.561887	8	8	-0.0025	0.0093		2.759	2.7521	0.501168	0.561887	8	8	-0.0025	0.0093		*	*	*	*	*	*	*	*
Mikan et al. 2000	113	367	715	348	2	45°34' N	84°40' W	USA	OTC	g N m-2	Nitrogen	Table 1 * Table 3	20 mg N; High-N soil	Yes	Forest	P. tremuloides	9.5752	11.1114	1.35535	2.13029	8	8	0.1488	0.0071		9.5752	11.1114	1.35535	2.13029	8	8	0.1488	0.0071		*	*	*	*	*	*	*	*
Niklaus et al. 1998	114	360	630	270	2	47°33' N	7°34' E	Switzerland	GC	kg N ha-1 land	No	Fig. 5	*	No	Grassland	*	3.05344	3.35878	0.647731	0.647731	8	8	0.0953	0.0103		3.05344	3.35878	0.647731	0.647731	8	8	0.0953	0.0103		*	*	*	*	*	*	*	*
Niklaus et al. 1998	115	360	630	270	2	47°33' N	7°34' E	Switzerland	GC	kg N ha-1 land	Phosphorus	Fig. 5	*	No	Grassland	*	2.59542	3.43511	0.431821	0.863642	8	8	0.2803	0.0114		2.59542	3.43511	0.431821	0.863642	8	8	0.2803	0.0114		*	*	*	*	*	*	*	*
Niklaus et al. 1998	116	360	630	270	2	47°33' N	7°34' E	Switzerland	GC	kg N ha-1 land	Legume	Fig. 5	*	No	Grassland	*	5.41985	5.19084	1.07955	0.863642	8	8	-0.0432	0.0084		5.41985	5.19084	1.07955	0.863642	8	8	-0.0432	0.0084		*	*	*	*	*	*	*	*
Niklaus et al. 1998	117	360	630	270	2	47°33' N	7°34' E	Switzerland	GC	kg N ha-1 land	Phosphorus & legume	Fig. 5	*	No	Grassland	*	6.03053	7.40458	1.72728	1.51137	8	8	0.2053	0.0155		6.03053	7.40458	1.72728	1.51137	8	8	0.2053	0.0155		*	*	*	*	*	*	*	*
Niklaus et al. 2003	118	360	600	240	6	47°33' N	7°34' E	Switzerland	OTC	g N m-2 land	No	Fig. 7	*	No	Grassland	*	4	4.2	0.282843	0.848528	8	8	0.0488	0.0057		*	*	*	*	*	*	*	*		4	4.2	0.282843	0.848528	8	8	0.0488	0.0057
Nitschelm et al. 1997	119	350	600	250	0.666667	47°27'N	8°41'E	Switzerland	FACE	g box-1	No	Table 1	*	No	Cropland	White clover	3.06	6.21	0.306	0.621	3	3	0.7077	0.0067		3.06	6.21	0.306	0.621	3	3	0.7077	0.0067		*	*	*	*	*	*	*	*
Norby & Iversen 2006	120	319	544	225	6	35°54'N	84°20' W	USA	FACE	kg N ha-1 land	No	Fig. 4a	*	No	Forest	Sweetgum	76.7906	71.6253	3.01831	1.71134	3	2	-0.0696	0.0008		79.0634	73.6915	5.70338	2.63514	3	2	-0.0704	0.0024		74.5179	69.5592	2.48793	2.43767	3	2	-0.0689	0.001
Oikawa et al. 2010	121	384.7	593	208.3	0.333333	39°44' N	141°7' E	Japan	GC	g plant-1	Fertillizer (nodulated)	Fig. 1 & Table 1	sd; 0.3 g N; average across different parts	Yes	Cropland	Soybean	0.179369	0.214385	0.0153356	0.00716664	5	5	0.1782	0.0017		0.179369	0.214385	0.0153356	0.00716664	5	5	0.1782	0.0017		*	*	*	*	*	*	*	*
Oikawa et al. 2010	122	384.7	593	208.3	0.333333	39°44' N	141°7' E	Japan	GC	g plant-1	Fertillizer (non-nodulated)	Fig. 1 & Table 1	sd; 0.3 g N; average across different parts	Yes	Cropland	Soybean	0.081643	0.0799335	0.00685346	0.00847533	5	5	-0.0211	0.0037		0.081643	0.0799335	0.00685346	0.00847533	5	5	-0.0211	0.0037		*	*	*	*	*	*	*	*
Pang et al. 2006	123	*	*	200	0.333333	31°37' N	120°28' E	China	FACE	g pot-1	Low Nitrogen	Table 1	14 mg N L-1	Yes	Cropland	Rice	0.356	0.353	0.0356	0.0353	3	3	-0.0085	0.0067		0.356	0.353	0.0356	0.0353	3	3	-0.0085	0.0067		*	*	*	*	*	*	*	*
Pang et al. 2006	124	*	*	200	0.333333	31°37' N	120°28' E	China	FACE	g pot-1	High Nitrogen	Table 1	28 mg N L-1	Yes	Cropland	Rice	0.63	0.579	0.063	0.0579	3	3	-0.0844	0.0067		0.63	0.579	0.063	0.0579	3	3	-0.0844	0.0067		*	*	*	*	*	*	*	*
Perez-Lopez et al. 2013	125	350	700	350	0.0767123	*	*	Canada	GC	mg plant-1	Fertilizer; 0 NaCl	Fig. 5a + b	10.5 g N day-1 m-3	Yes	Cropland	Barley	35.8434	39.759	2.15103	1.8445	6	6	0.1037	0.001		35.8434	39.759	2.15103	1.8445	6	6	0.1037	0.001		*	*	*	*	*	*	*	*
Perez-Lopez et al. 2013	126	350	700	350	0.0767123	*	*	Canada	GC	mg plant-1	Fertilizer; 80 NaCl	Fig. 5a + b	10.5 g N day-1 m-3	Yes	Cropland	Barley	26.3554	34.0361	1.64977	0.824883	6	6	0.2557	0.0008		26.3554	34.0361	1.64977	0.824883	6	6	0.2557	0.0008		*	*	*	*	*	*	*	*
Perez-Lopez et al. 2013	127	350	700	350	0.0767123	*	*	Canada	GC	mg plant-1	Fertilizer; 160 NaCl	Fig. 5a + b	10.5 g N day-1 m-3	Yes	Cropland	Barley	19.7289	25.4518	0.824883	1.16656	6	6	0.2547	0.0006		19.7289	25.4518	0.824883	1.16656	6	6	0.2547	0.0006		*	*	*	*	*	*	*	*
Perez-Lopez et al. 2013	128	350	700	350	0.0767123	*	*	Canada	GC	mg plant-1	Fertilizer; 240 NaCl	Fig. 5a + b	10.5 g N day-1 m-3	Yes	Cropland	Barley	15.2108	21.5361	0.824883	1.0434	6	6	0.3477	0.0009		15.2108	21.5361	0.824883	1.0434	6	6	0.3477	0.0009		*	*	*	*	*	*	*	*
Polley et al. 1997	129	385	690	305	1.08333	*	*	*	GC	g container-1	No	Fig. 4	385 ppm vs. 690 ppm	No	Forest	A. smallii	24.0385	32.4519	2.40385	3.24519	3	3	0.3001	0.0067		24.0385	32.4519	2.40385	3.24519	3	3	0.3001	0.0067		*	*	*	*	*	*	*	*
Polley et al. 1997	130	385	980	595	1.08333	*	*	*	GC	g container-1	No	Fig. 4	385 ppm vs. 980 ppm	No	Forest	A. smallii	24.0385	39.9038	2.40385	3.99038	3	3	0.5068	0.0067		24.0385	39.9038	2.40385	3.99038	3	3	0.5068	0.0067		*	*	*	*	*	*	*	*
Pregitzer et al. 1995	131	245	693	448	0.432877	45°34' N	84°40' W	USA	OTC	g N chamber-1	No	Table 1 * Table 2	Low-N soil	No	Forest	Populus x euramericana	3.1194	3.07492	0.393588	0.33171	5	5	-0.0144	0.0055		3.1194	3.07492	0.393588	0.33171	5	5	-0.0144	0.0055		*	*	*	*	*	*	*	*
Pregitzer et al. 1995	132	245	693	448	0.432877	45°34' N	84°40' W	USA	OTC	g N chamber-1	No	Table 1 * Table 2	High-N soil	No	Forest	Populus x euramericana	6.41408	9.95454	0.360198	0.481175	5	5	0.4395	0.0011		6.41408	9.95454	0.360198	0.481175	5	5	0.4395	0.0011		*	*	*	*	*	*	*	*
Rakshit et al. 2012	133	370	650	280	0.328767	*	*	India	GC	g pot-1	Fertillizer + warming	Table 2 * Table 4	120 kg N ha-1; average of 0, 120 and 240	Yes	Cropland	Wheat	0.214958	0.220727	0.0214958	0.0220727	3	3	0.0262	0.0067		0.214958	0.220727	0.0214958	0.0220727	3	3	0.0262	0.0067		*	*	*	*	*	*	*	*
Roy et al. 2012	134	390	550	160	0.25	20°25'N	85°55'E	India	OTC	g N m-2	Fertillizer + warming	Table 2	100 kg N ha-1	Yes	Cropland	Rice	4.768	6.122	0.4768	0.6122	5	5	0.25	0.004		4.768	6.122	0.4768	0.6122	5	5	0.25	0.004		*	*	*	*	*	*	*	*
Runion et al. 1999	135	372.3	739.5	367.2	1.66667	*	*	*	OTC	g	No	Table 1 (Biomass)* Table 3 (nitrogen)	Water stress 1	No	Forest	Pine	4.0434	4.23133	0.40434	0.423133	5	5	0.0454	0.004		4.0434	4.23133	0.40434	0.423133	5	5	0.0454	0.004		*	*	*	*	*	*	*	*
Runion et al. 1999	136	372.3	739.5	367.2	1.66667	*	*	*	OTC	g	No	Table 1 (Biomass)* Table 3 (nitrogen)	Water stress 2	No	Forest	Pine	1.08445	1.40994	0.108445	0.140994	5	5	0.2624	0.004		1.08445	1.40994	0.108445	0.140994	5	5	0.2624	0.004		*	*	*	*	*	*	*	*
Soussana et al. 1996	137	350	700	350	2	*	*	France	GC	kg N ha-1	Low Nitrogen	Table 1A + Table 3	N- (160 kg N fertilizer ha -1 y-1)	Yes	Grassland	Ryegrass	106.5	99	10.226	8.97616	4	4	-0.073	0.0044		106.5	99	10.226	8.97616	4	4	-0.073	0.0044		*	*	*	*	*	*	*	*
Soussana et al. 1996	138	350	700	350	2	*	*	France	GC	kg N ha-1	High Nitrogen	Table 1A + Table 3	N+ (530 kg N fertilizer ha -1 y-1)	Yes	Grassland	Ryegrass	396	330.5	17.5418	16.8692	4	4	-0.1808	0.0011		396	330.5	17.5418	16.8692	4	4	-0.1808	0.0011		*	*	*	*	*	*	*	*
Soussana et al. 1996	139	350	700	350	2	*	*	France	GC	kg N ha-1	Low Nitrogen + warming	Table 1A + Table 3	N- (160 kg N fertilizer ha -1 y-1)	Yes	Grassland	Ryegrass	106.5	107.5	10.226	9.39605	4	4	0.0093	0.0042		106.5	107.5	10.226	9.39605	4	4	0.0093	0.0042		*	*	*	*	*	*	*	*
Soussana et al. 1996	140	350	700	350	2	*	*	France	GC	kg N ha-1	High Nitrogen + warming	Table 1A + Table 3	N+ (530 kg N fertilizer ha -1 y-1)	Yes	Grassland	Ryegrass	396	409	17.5418	17.0629	4	4	0.0323	0.0009		396	409	17.5418	17.0629	4	4	0.0323	0.0009		*	*	*	*	*	*	*	*
Tingey et al. 2003	141	*	*	180	4	*	*	USA	OTC	g plant-1	Warming	Fig. 3a (needles + wood), only AC and EC	*	No	Forest	P. menziesii	2.46214	2.3534	0.246214	0.23534	5	5	-0.0452	0.004		*	*	*	*	*	*	*	*		2.46214	2.3534	0.246214	0.23534	5	5	-0.0452	0.004
Tu et al. 2009	142	376	550	174	0.375	35°44'N	78°41' W	USA	OTC	g plant-1	cleaning O3	Fig. 3d	*	No	Cropland	Peanut	4.38785	5.13084	0.509903	0.495636	3	2	0.1564	0.0092		4.38785	5.13084	0.509903	0.495636	3	2	0.1564	0.0092		*	*	*	*	*	*	*	*
Tu et al. 2009	143	376	550	174	0.375	35°44'N	78°41' W	USA	OTC	g plant-1	No	Fig. 3d	*	No	Cropland	Peanut	3.8271	4.58411	0.495636	0.495636	2	2	0.1805	0.0142		3.8271	4.58411	0.495636	0.495636	2	2	0.1805	0.0142		*	*	*	*	*	*	*	*
Tu et al. 2009	144	376	550	174	0.375	35°44'N	78°41' W	USA	OTC	g plant-1	O3	Fig. 3d	*	No	Cropland	Peanut	2.6215	3.74299	0.509903	0.515461	3	2	0.3561	0.0221		2.6215	3.74299	0.509903	0.515461	3	2	0.3561	0.0221		*	*	*	*	*	*	*	*
Tu et al. 2009	145	376	730	354	0.375	35°44'N	78°41' W	USA	OTC	g plant-1	cleaning O3	Fig. 3d	*	No	Cropland	Peanut	4.38785	4.78037	0.509903	0.607027	3	3	0.0857	0.0099		4.38785	4.78037	0.509903	0.607027	3	3	0.0857	0.0099		*	*	*	*	*	*	*	*
Tu et al. 2009	146	376	730	354	0.375	35°44'N	78°41' W	USA	OTC	g plant-1	No	Fig. 3d	*	No	Cropland	Peanut	3.8271	5.1729	0.495636	0.495636	2	2	0.3013	0.013		3.8271	5.1729	0.495636	0.495636	2	2	0.3013	0.013		*	*	*	*	*	*	*	*
Tu et al. 2009	147	376	730	354	0.375	35°44'N	78°41' W	USA	OTC	g plant-1	O3	Fig. 3d	*	No	Cropland	Peanut	2.6215	4.66822	0.509903	0.485622	3	3	0.577	0.0162		2.6215	4.66822	0.509903	0.485622	3	3	0.577	0.0162		*	*	*	*	*	*	*	*
Verburg et al. 2004	148	365	700	335	0.213699	*	*	*	GC	mg plant-1	No	Fig. 3	unlabeled; sum of tissues	No	Forest	Pine	1103.45	1165.98	157.561	234.971	4	4	0.0551	0.0153		1103.45	1165.98	157.561	234.971	4	4	0.0551	0.0153		*	*	*	*	*	*	*	*
Verburg et al. 2004	149	365	700	335	0.213699	*	*	*	GC	mg plant-1	No	Fig. 3	labeled; sum of tissues	No	Forest	Pine	816.552	976.552	125.436	137.722	4	4	0.1789	0.0109		816.552	976.552	125.436	137.722	4	4	0.1789	0.0109		*	*	*	*	*	*	*	*
Vogel et al. 1997	150	349	695	346	0.438356	45°34' N	84°40' W	USA	OTC	g plant-1	No	Table 3	*	No	Forest	Black alder	0.558	0.746	0.0506952	0.0452769	5	5	0.2904	0.0024		0.558	0.746	0.0506952	0.0452769	5	5	0.2904	0.0024		*	*	*	*	*	*	*	*
Weerakoon et al. 2005	151	*	700	*	0.183562	15° N	121° E	Philippines	OTC	g N m-2 land	Fertillizer	Fig. 3	0 kg N ha-1	Yes	Cropland	Rice	3.43802	2.64463	0.343802	0.264463	3	3	-0.2624	0.0067		3.43802	2.64463	0.343802	0.264463	3	3	-0.2624	0.0067		*	*	*	*	*	*	*	*
Weerakoon et al. 2005	152	*	700	*	0.183562	15° N	121° E	Philippines	OTC	g N m-2 land	Fertillizer	Fig. 3	90 kg N ha-1	Yes	Cropland	Rice	7.36088	8.06612	0.736088	0.806612	3	3	0.0915	0.0067		7.36088	8.06612	0.736088	0.806612	3	3	0.0915	0.0067		*	*	*	*	*	*	*	*
Weerakoon et al. 2005	153	*	700	*	0.183562	15° N	121° E	Philippines	OTC	g N m-2 land	Fertillizer	Fig. 3	200 kg N ha-1	Yes	Cropland	Rice	11.4601	13.3554	1.14601	1.33554	3	3	0.153	0.0067		11.4601	13.3554	1.14601	1.33554	3	3	0.153	0.0067		*	*	*	*	*	*	*	*
Weigel & Manderscheid 2012	154	373	549	176	0.75	52°82'N	10°83'E	Germany	FACE	g N m-2	Fertillizer with high Nitrogen	Table 2 * Table 4	262 kg N ha-1	Yes	Cropland	Barley 2000	28.8788	25.047	1.89957	0.51336	2	2	-0.1424	0.0024		28.8788	25.047	1.89957	0.51336	2	2	-0.1424	0.0024		*	*	*	*	*	*	*	*
Weigel & Manderscheid 2012	155	373	550	177	0.191667	52°82'N	10°83'E	Germany	FACE	g N m-2	Fertillizer with high Nitrogen	Table 2 * Table 5	197 kg N ha-1	Yes	Cropland	Grass 2000	12.826	11.946	0.273792	0.307167	2	2	-0.0711	0.0006		12.826	11.946	0.273792	0.307167	2	2	-0.0711	0.0006		*	*	*	*	*	*	*	*
Weigel & Manderscheid 2012	156	371	550	179	0.416667	52°82'N	10°83'E	Germany	FACE	g N m-2	Fertillizer with high Nitrogen	Table 2 * Table 6	126 kg N ha-1	Yes	Cropland	Sugar beet 2001	26.381	25.8024	2.6381	2.58024	1	1	*	*		26.381	25.8024	2.6381	2.58024	1	1	*	*		*	*	*	*	*	*	*	*
Weigel & Manderscheid 2012	157	377	548	171	0.666667	52°82'N	10°83'E	Germany	FACE	g N m-2	Fertillizer with high Nitrogen	Table 2 * Table 7	251 kg N ha-1	Yes	Cropland	Wheat 2002	17.6226	19.5104	0.180595	2.265	2	2	0.1018	0.0068		17.6226	19.5104	0.180595	2.265	2	2	0.1018	0.0068		*	*	*	*	*	*	*	*
Weigel & Manderscheid 2012	158	378	547	169	0.608333	52°82'N	10°83'E	Germany	FACE	g N m-2	Fertillizer with high Nitrogen	Table 2 * Table 8	179 kg N ha-1	Yes	Cropland	Barley 2003	18.4832	18.59	1.89165	0.80893	2	2	0.0058	0.0062		18.4832	18.59	1.89165	0.80893	2	2	0.0058	0.0062		*	*	*	*	*	*	*	*
Weigel & Manderscheid 2012	159	380	550	170	0.166667	52°82'N	10°83'E	Germany	FACE	g N m-2	Fertillizer with high Nitrogen	Table 2 * Table 9	72 kg N ha-1	Yes	Cropland	Grass 2003	6.7925	6.7571	0.0459619	0.921643	2	2	-0.0052	0.0093		6.7925	6.7571	0.0459619	0.921643	2	2	-0.0052	0.0093		*	*	*	*	*	*	*	*
Weigel & Manderscheid 2012	160	377	549	172	0.416667	52°82'N	10°83'E	Germany	FACE	g N m-2	Fertillizer with high Nitrogen	Table 2 * Table 10	156 kg N ha-1	Yes	Cropland	Sugar beet 2004	24.1944	22.4992	2.68361	0.357513	2	2	-0.0726	0.0063		24.1944	22.4992	2.68361	0.357513	2	2	-0.0726	0.0063		*	*	*	*	*	*	*	*
Weigel & Manderscheid 2012	161	378	549	171	0.708333	52°82'N	10°83'E	Germany	FACE	g N m-2	Fertillizer with high Nitrogen	Table 2 * Table 11	168 kg N ha-1	Yes	Cropland	Wheat 2005	26.4231	25.5816	0.476024	1.0963	2	2	-0.0324	0.0011		26.4231	25.5816	0.476024	1.0963	2	2	-0.0324	0.0011		*	*	*	*	*	*	*	*
Weigel & Manderscheid 2012	162	373	549	176	0.75	52°82'N	10°83'E	Germany	FACE	g N m-2	Fertillizer with low Nitrogen	Table 2 * Table 4	105 kg N ha-1	Yes	Cropland	Barley 2000	19.448	17.779	0.769332	0.437275	2	2	-0.0897	0.0011		19.448	17.779	0.769332	0.437275	2	2	-0.0897	0.0011		*	*	*	*	*	*	*	*
Weigel & Manderscheid 2012	163	373	550	177	0.191667	52°82'N	10°83'E	Germany	FACE	g N m-2	Fertillizer with low Nitrogen	Table 2 * Table 5	99 kg N ha-1	Yes	Cropland	Grass 2000	9.5348	8.6553	1.30051	0.225284	2	2	-0.0968	0.0096		9.5348	8.6553	1.30051	0.225284	2	2	-0.0968	0.0096		*	*	*	*	*	*	*	*
Weigel & Manderscheid 2012	164	371	550	179	0.416667	52°82'N	10°83'E	Germany	FACE	g N m-2	Fertillizer with low Nitrogen	Table 2 * Table 6	63 kg N ha-1	Yes	Cropland	Sugar beet 2001	18.2305	17.9168	1.82305	1.79168	1	1	*	*		18.2305	17.9168	1.82305	1.79168	1	1	*	*		*	*	*	*	*	*	*	*
Weigel & Manderscheid 2012	165	377	548	171	0.666667	52°82'N	10°83'E	Germany	FACE	g N m-2	Fertillizer with low Nitrogen	Table 2 * Table 7	114 kg N ha-1	Yes	Cropland	Wheat 2002	13.2582	13.3076	1.15131	0.182716	2	2	0.0037	0.0039		13.2582	13.3076	1.15131	0.182716	2	2	0.0037	0.0039		*	*	*	*	*	*	*	*
Weigel & Manderscheid 2012	166	378	547	169	0.608333	52°82'N	10°83'E	Germany	FACE	g N m-2	Fertillizer with low Nitrogen	Table 2 * Table 8	105 kg N ha-1	Yes	Cropland	Barley 2003	12.1892	12.7857	0.278034	0	2	2	0.0478	0.0003		12.1892	12.7857	0.278034	0	2	2	0.0478	0.0003		*	*	*	*	*	*	*	*
Weigel & Manderscheid 2012	167	380	550	170	0.166667	52°82'N	10°83'E	Germany	FACE	g N m-2	Fertillizer with low Nitrogen	Table 2 * Table 9	36 kg N ha-1	Yes	Cropland	Grass 2003	3.441	3.5035	0.313955	0.0346482	2	2	0.018	0.0042		3.441	3.5035	0.313955	0.0346482	2	2	0.018	0.0042		*	*	*	*	*	*	*	*
Weigel & Manderscheid 2012	168	377	549	172	0.416667	52°82'N	10°83'E	Germany	FACE	g N m-2	Fertillizer with low Nitrogen	Table 2 * Table 10	78 kg N ha-1	Yes	Cropland	Sugar beet 2004	15.9651	19.8204	1.95119	0	2	2	0.2163	0.0075		15.9651	19.8204	1.95119	0	2	2	0.2163	0.0075		*	*	*	*	*	*	*	*
Weigel & Manderscheid 2012	169	378	549	171	0.708333	52°82'N	10°83'E	Germany	FACE	g N m-2	Fertillizer with low Nitrogen	Table 2 * Table 11	84 kg N ha-1	Yes	Cropland	Wheat 2005	16.638	15.0732	0.398808	0.402202	2	2	-0.0988	0.0006		16.638	15.0732	0.398808	0.402202	2	2	-0.0988	0.0006		*	*	*	*	*	*	*	*
Zak et al. 2007	170	374	531	157	7	45°40.5' N	89°37.5' W	USA	FACE	g N m-2 land	O3; average of contral and O3	Table 1	*	No	Forest	Across plant community type	12.1	17.3	4.13442	5.42021	3	3	0.3575	0.0716		*	*	*	*	*	*	*	*		12.1	17.3	4.13442	5.42021	3	3	0.3575	0.0716
Zak et al. 2000b	171	367	715	348	2.5	45°34' N	84°40' W	USA	OTC	g N chamber-1	Nitrogen	Table 3	20 mg N; Low-N soil	Yes	Forest	P. tremuloides	24.4	22.9	1.52053	6.39515	5	5	-0.0634	0.0164		24.4	22.9	1.52053	6.39515	5	5	-0.0634	0.0164		*	*	*	*	*	*	*	*
Zak et al. 2000b	172	367	715	348	2.5	45°34' N	84°40' W	USA	OTC	g N chamber-1	Nitrogen	Table 3	20 mg N; High-N soil	Yes	Forest	P. tremuloides	92	109	6.50696	8.34053	5	5	0.1696	0.0022		92	109	6.50696	8.34053	5	5	0.1696	0.0022		*	*	*	*	*	*	*	*
Zanetti et al. 1996	173	350	600	250	3	47°27'N	8°41'E	Switzerland	FACE	g N m-2	Low Nitrogen	Table I	17 g N m-2	Yes	Cropland	White clover	47.2	51.4	4.72	5.14	3	3	0.0852	0.0067		47.2	51.4	4.72	5.14	3	3	0.0852	0.0067		*	*	*	*	*	*	*	*
Zanetti et al. 1996	174	350	600	250	3	47°27'N	8°41'E	Switzerland	FACE	g N m-2	High Nitrogen	Table I	51.3 g N m-2	Yes	Cropland	White clover	47.9333	50.2667	4.79333	5.02667	3	3	0.0475	0.0067		47.9333	50.2667	4.79333	5.02667	3	3	0.0475	0.0067		*	*	*	*	*	*	*	*
Zanetti et al. 1996	175	350	600	250	3	47°27'N	8°41'E	Switzerland	FACE	g N m-2	Low Nitrogen	Table I	17 g N m-2	Yes	Cropland	White clover & ryegrass	27.9	36.0667	2.79	3.60667	3	3	0.2567	0.0067		27.9	36.0667	2.79	3.60667	3	3	0.2567	0.0067		*	*	*	*	*	*	*	*
Zanetti et al. 1996	176	350	600	250	3	47°27'N	8°41'E	Switzerland	FACE	g N m-2	High Nitrogen	Table I	51.3 g N m-2	Yes	Cropland	White clover & ryegrass	18.7	26.4333	1.87	2.64333	3	3	0.3461	0.0067		18.7	26.4333	1.87	2.64333	3	3	0.3461	0.0067		*	*	*	*	*	*	*	*
Zeng et al. 2011	177	396	595.5	199.5	0.328767	32°35' N	119°42'E	China	FACE	g N m-2	Fertillizer	Table 3; day 120 sum of straw and ear	150 kg N ha-1	Yes	Cropland	Rice	13.1	16.5	0.866025	4.18927	3	3	0.2307	0.0229		13.1	16.5	0.866025	4.18927	3	3	0.2307	0.0229		*	*	*	*	*	*	*	*
Zeng et al. 2011	178	396	595.5	199.5	0.328767	32°35' N	119°42'E	China	FACE	g N m-2	Fertillizer	Table 3; day 120 sum of straw and ear	150 kg N ha-1	Yes	Cropland	Barnyard grass	1.9	1	0.489898	0.244949	3	3	-0.6419	0.0422		1.9	1	0.489898	0.244949	3	3	-0.6419	0.0422		*	*	*	*	*	*	*	*

## Sheet: BPNP
																	Total									Short-term									Long-term
Reference	Obs	Ambient CO2 (ppm)	Elevated CO2 (ppm)	CO2 difference (ppm)	Treatment duration (years)	Latitude	Longitude	Country	Fercility	Unit	Other treatments	Data location	Notes	Nitrogen addition	Ecosystem	Vegetation	Mean_a	Mean_e	Std_a	Std_e	N_a	N_e	lnR	Var(lnR)		Mean_a	Mean_e	Std_a	Std_e	N_a	N_e	lnR	Var(lnR)		Mean_a	Mean_e	Std_a	Std_e	N_a	N_e	lnR	Var(lnR)
Aranjuelo et al. 2011	1	350	700	350	0.583333	*	*	Canada	GC	g plant-1	No	Table 1 * Fig. 3	*	No	Forest	Evergreen Broadleaf	0.223723	0.251944	0.0527321	0.0668068	8	8	0.1187	0.0157		0.223723	0.251944	0.0527321	0.0668068	8	8	0.1187	0.0157		*	*	*	*	*	*	*	*
Arnone & Gordon 1990	2	350	650	300	0.128767	*	*	USA	GC	mg	Nitrogen	Table 4	*	Yes	Forest	Broadleaf	5.3	7.7	1.78885	3.63731	5	3	0.3735	0.0972		5.3	7.7	1.78885	3.63731	5	3	0.3735	0.0972		*	*	*	*	*	*	*	*
Arnone & Gordon 1990	3	350	650	300	0.128767	*	*	USA	GC	mg	Nodulation	Table 4	*	No	Forest	Broadleaf	10.5	10.4	1.11803	3.3541	5	5	-0.0096	0.0231		10.5	10.4	1.11803	3.3541	5	5	-0.0096	0.0231		*	*	*	*	*	*	*	*
Arnone & Gordon 1990	4	350	650	300	0.128767	*	*	USA	GC	mg	Nodulation + Nitrogen	Table 4	*	Yes	Forest	Broadleaf	17.8	35.5	4.24853	11.6047	5	3	0.6903	0.047		17.8	35.5	4.24853	11.6047	5	3	0.6903	0.047		*	*	*	*	*	*	*	*
Azam et al. 2013	5	400	1000	600	1	*	*	*	GC	mg N plant-1	Fertilizer	Table 1 * Table 3	*	Yes	Cropland	Carrot	801.84	1028.66	15.0345	9.6084	5	5	0.2491	0.0001		801.84	1028.66	15.0345	9.6084	5	5	0.2491	0.0001		*	*	*	*	*	*	*	*
Azam et al. 2013	6	400	1000	600	1	*	*	*	GC	mg N plant-1	Fertilizer	Table 1 * Table 3	*	Yes	Cropland	Turnip	396.851	561.735	6.2426	12.312	5	5	0.3475	0.0001		396.851	561.735	6.2426	12.312	5	5	0.3475	0.0001		*	*	*	*	*	*	*	*
Bader et al. 2009	7	380	550	170	6	47°28' N	7°30' E	Switzerland	FACE	g N m-2 land	No	Table 2 * Fig.2	*	No	Forest	*	2.1398	1.5962	0.254981	0.201069	14	12	-0.2931	0.0023		*	*	*	*	*	*	*	*		2.1398	1.5962	0.254981	0.201069	14	12	-0.2931	0.0023
Barnard et al. 2004 (NP)	8	365	665	300	1.25	*	*	*	GC	g N m-2 land	No	Fig.2c	*	No	Grassland	Holcus	2.54644	3.12074	0.362345	0.233321	6	6	0.2034	0.0043		2.54644	3.12074	0.362345	0.233321	6	6	0.2034	0.0043		*	*	*	*	*	*	*	*
Barnard et al. 2004 (NP)	9	365	665	300	1.25	*	*	*	GC	g N m-2 land	No	Fig.6c	*	No	Grassland	Festuca	3.00268	4.77212	0.78804	1.3134	6	6	0.4633	0.0241		3.00268	4.77212	0.78804	1.3134	6	6	0.4633	0.0241		*	*	*	*	*	*	*	*
Billes et al. 1993	10	350	700	350	0.0767123	*	*	*	GC	mg pot-1	Fertillizer without N	Table 1	*	No	Cropland	Wheat	6.3798	8.8266	0.63798	0.88266	4	4	0.3246	0.005		6.3798	8.8266	0.63798	0.88266	4	4	0.3246	0.005		*	*	*	*	*	*	*	*
Billes et al. 1993	11	350	700	350	0.0767123	*	*	*	GC	mg pot-1	Fertillizer witht N	Table 1	50 kg N ha-1; from Zak et al. 2000 (New Phytologist; Table 6)	Yes	Cropland	Wheat	8.421	10.7038	0.8421	1.07038	4	4	0.2399	0.005		8.421	10.7038	0.8421	1.07038	4	4	0.2399	0.005		*	*	*	*	*	*	*	*
Bloor et al. 2009	12	380	645	265	0.333333	*	*	France	GC	mg	No	Fig. 1; Fraxinus without competition	No COMP	No	Grassland	*	1.94595	1.85328	1.1349	0.453959	6	6	-0.0488	0.0667		1.94595	1.85328	1.1349	0.453959	6	6	-0.0488	0.0667		*	*	*	*	*	*	*	*
Bloor et al. 2009	13	380	645	265	0.333333	*	*	France	GC	mg	No	Table 1 and Fig. 1; Sum of the two plants	COMP	No	Grassland	*	113.124	139.017	30.3741	35.5178	6	6	0.2061	0.0229		113.124	139.017	30.3741	35.5178	6	6	0.2061	0.0229		*	*	*	*	*	*	*	*
Bloor et al. 2009	14	380	645	265	0.333333	*	*	France	GC	mg	Nitrogen	Fig. 1; Fraxinus without competition	No COMP	Yes	Grassland	*	2.10811	2.94208	0.680939	0.907919	6	6	0.3333	0.0333		2.10811	2.94208	0.680939	0.907919	6	6	0.3333	0.0333		*	*	*	*	*	*	*	*
Bloor et al. 2009	15	380	645	265	0.333333	*	*	France	GC	mg	Nitrogen	Table 1 and Fig. 1; Sum of the two plants	COMP	Yes	Grassland	*	49.1012	51.6243	9.11281	10.0959	6	6	0.0501	0.0121		49.1012	51.6243	9.11281	10.0959	6	6	0.0501	0.0121		*	*	*	*	*	*	*	*
Bradford et al. 2012	16	375	550	175	0.5	*	*	*	GC	g N m-2	No	Table 2	375 ppm vs. 550 ppm	No	Grassland	*	15	12	4.67654	4.67654	3	3	-0.2231	0.083		15	12	4.67654	4.67654	3	3	-0.2231	0.083		*	*	*	*	*	*	*	*
Bradford et al. 2012	17	375	550	175	0.5	*	*	*	GC	g N m-2	Low Nitrogen	Table 2	375 ppm vs. 550 ppm	Yes	Grassland	*	15	17	2.20454	6.12372	6	6	0.1252	0.0252		15	17	2.20454	6.12372	6	6	0.1252	0.0252		*	*	*	*	*	*	*	*
Bradford et al. 2012	18	375	550	175	0.5	*	*	*	GC	g N m-2	High Nitrogen	Table 2	375 ppm vs. 550 ppm	Yes	Grassland	*	16	24	3.42929	3.91918	6	6	0.4055	0.0121		16	24	3.42929	3.91918	6	6	0.4055	0.0121		*	*	*	*	*	*	*	*
Bradford et al. 2012	19	375	700	325	0.5	*	*	*	GC	g N m-2	No	Table 2	375 ppm vs. 700 ppm	No	Grassland	*	15	18	4.67654	8.14064	3	3	0.1823	0.1006		15	18	4.67654	8.14064	3	3	0.1823	0.1006		*	*	*	*	*	*	*	*
Bradford et al. 2012	20	375	700	325	0.5	*	*	*	GC	g N m-2	Low Nitrogen	Table 2	375 ppm vs. 700 ppm	Yes	Grassland	*	15	19	2.20454	3.42929	6	6	0.2364	0.009		15	19	2.20454	3.42929	6	6	0.2364	0.009		*	*	*	*	*	*	*	*
Bradford et al. 2012	21	375	700	325	0.5	*	*	*	GC	g N m-2	High Nitrogen	Table 2	375 ppm vs. 700 ppm	Yes	Grassland	*	16	31	3.42929	6.85857	6	6	0.6614	0.0158		16	31	3.42929	6.85857	6	6	0.6614	0.0158		*	*	*	*	*	*	*	*
Brown et al. 2007	22	350	700	350	6	28°38' N	80°42' W	USA	OTC	g N m-2 land	No	Table 3 + Table 4	Sum across different diameters and depths	No	Forest	*	46.51	38.37	8.69809	5.35007	8	8	-0.1924	0.0068		*	*	*	*	*	*	*	*		46.51	38.37	8.69809	5.35007	8	8	-0.1924	0.0068
Calfapietra et al. 2007	23	370	550	180	3	42°37'N	11°51'E	Italy	FACE	g N m-2 land	No	Fig. 1	*	No	Forest	Sum of different species	38	36	3.87298	3.87298	3	3	-0.0541	0.0073		38	36	3.87298	3.87298	3	3	-0.0541	0.0073		*	*	*	*	*	*	*	*
Curtis et al. 1990	24	343	681	338	2	38°53' N	76°33' W	USA	OTC	g core-1	No	Table 1 multiply by Fig. 4	*	No	Grassland	SC	0.219425	0.328319	0.0373008	0.0209755	5	5	0.403	0.0066		0.219425	0.328319	0.0373008	0.0209755	5	5	0.403	0.0066		*	*	*	*	*	*	*	*
Curtis et al. 1990	25	343	681	338	2	38°53' N	76°33' W	USA	OTC	g core-1	No	Table 1 multiply by Fig. 4	*	No	Grassland	SP	0.252389	0.25708	0.0276046	0.0173147	5	5	0.0184	0.0033		0.252389	0.25708	0.0276046	0.0173147	5	5	0.0184	0.0033		*	*	*	*	*	*	*	*
Curtis et al. 1990	26	343	681	338	2	38°53' N	76°33' W	USA	OTC	g core-1	No	Table 1 multiply by Fig. 4	*	No	Grassland	MX	0.353982	0.39292	0.0197882	0.0142475	5	5	0.1043	0.0009		0.353982	0.39292	0.0197882	0.0142475	5	5	0.1043	0.0009		*	*	*	*	*	*	*	*
Daepp et al. 2001	27	350	600	250	2	47°27'N	8°41'E	Switzerland	FACE	g m-2	Nitrogen	Fig. 2	Nitrogen level 1; different experiment from Daepp et al. 2000	Yes	Grassland	Lolium perenne; Vegetative + reproductive	7.35849	9.43396	0.735849	0.943396	6	6	0.2485	0.0033		7.35849	9.43396	0.735849	0.943396	6	6	0.2485	0.0033		*	*	*	*	*	*	*	*
Daepp et al. 2001	28	350	600	250	2	47°27'N	8°41'E	Switzerland	FACE	g m-2	Nitrogen	Fig. 2	Nitrogen level 2; different experiment from Daepp et al. 2000	Yes	Grassland	Lolium perenne; Vegetative + reproductive	10	12.3585	1	1.23585	6	6	0.2118	0.0033		10	12.3585	1	1.23585	6	6	0.2118	0.0033		*	*	*	*	*	*	*	*
Daepp et al. 2001	29	350	600	250	2	47°27'N	8°41'E	Switzerland	FACE	g m-2	Nitrogen	Fig. 2	Nitrogen level 3; different experiment from Daepp et al. 2000	Yes	Grassland	Lolium perenne; Vegetative + reproductive	11.6981	15.0943	1.16981	1.50943	6	6	0.2549	0.0033		11.6981	15.0943	1.16981	1.50943	6	6	0.2549	0.0033		*	*	*	*	*	*	*	*
Daepp et al. 2000	30	350	600	250	6	47°27'N	8°41'E	Switzerland	FACE	g m-2	Nitrogen	Table 2	Low N; different experiment from Daepp et al. 2001	Yes	Grassland	Lolium perenne	2.4	3.5	0.24	0.35	6	6	0.3773	0.0033		*	*	*	*	*	*	*	*		2.4	3.5	0.24	0.35	6	6	0.3773	0.0033
Daepp et al. 2000	31	350	600	250	6	47°27'N	8°41'E	Switzerland	FACE	g m-2	Nitrogen	Table 2	High N; different experiment from Daepp et al. 2001	Yes	Grassland	Lolium perenne	2.2	3.9	0.22	0.39	6	6	0.5725	0.0033		*	*	*	*	*	*	*	*		2.2	3.9	0.22	0.39	6	6	0.5725	0.0033
Dakora & Drake 2000	32	364	660	296	0.333333	38°51' N	75°36' W	USA	OTC	mg plant-1	No	Fig. 1	Sediment material	No	Grassland	Spartina	0.81761	0.81761	0.154056	0.308112	6	6	0	0.0296		0.81761	0.81761	0.154056	0.308112	6	6	0	0.0296		*	*	*	*	*	*	*	*
Dakora & Drake 2000	33	364	665	301	0.333333	38°51' N	75°36' W	USA	OTC	mg plant-1	No	Fig. 1	Sediment material	No	Grassland	Scirpus	17.2327	11.5723	4.46762	4.15951	6	6	-0.3982	0.0327		17.2327	11.5723	4.46762	4.15951	6	6	-0.3982	0.0327		*	*	*	*	*	*	*	*
Dakora & Drake 2000	34	364	660	296	0.333333	38°51' N	75°36' W	USA	OTC	mg plant-1	No	Fig. 5	Sediment-free material	No	Grassland	Spartina	0.428571	0.428571	0.209956	0.209956	6	6	0	0.08		0.428571	0.428571	0.209956	0.209956	6	6	0	0.08		*	*	*	*	*	*	*	*
Dakora & Drake 2000	35	364	665	301	0.333333	38°51' N	75°36' W	USA	OTC	mg plant-1	No	Fig. 5	Sediment-free material	No	Grassland	Scirpus	13.3714	10.1143	6.7186	6.08873	6	6	-0.2792	0.1025		13.3714	10.1143	6.7186	6.08873	6	6	-0.2792	0.1025		*	*	*	*	*	*	*	*
de Graaff et al. 2009	36	392	792	400	0.0876712	*	*	USA	GC	mg plant-1	No	Fig. 3b	Wild	No	Cropland	Wheat	1.54545	2.01515	0.131216	0.314918	3	3	0.2654	0.0105		1.54545	2.01515	0.131216	0.314918	3	3	0.2654	0.0105		*	*	*	*	*	*	*	*
de Graaff et al. 2009	37	392	792	400	0.0876712	*	*	USA	GC	mg plant-1	No	Fig. 3b	Cultivated	No	Cropland	Wheat	0.818182	1.25758	0.341162	0.419891	3	3	0.4299	0.0951		0.818182	1.25758	0.341162	0.419891	3	3	0.4299	0.0951		*	*	*	*	*	*	*	*
Dijkstra et al. 2010 (FE)	38	400	780	380	0.230137	40°50' N	104°47' W	USA	GC	g pot-1	Low water	Fig. 2 & Fig. 3; TPNP-APNP	Monocultures	No	Grassland	average of five species	0.173109	0.179268	0.0512495	0.0399366	10	10	0.0352	0.0137		0.173109	0.179268	0.0512495	0.0399366	10	10	0.0352	0.0137		*	*	*	*	*	*	*	*
Dijkstra et al. 2010 (FE)	39	400	780	380	0.230137	40°50' N	104°47' W	USA	GC	g pot-1	High water	Fig. 2 & Fig. 3; TPNP-APNP	Monocultures	No	Grassland	average of five species	0.186222	0.188614	0.0493866	0.0421781	10	10	0.0128	0.012		0.186222	0.188614	0.0493866	0.0421781	10	10	0.0128	0.012		*	*	*	*	*	*	*	*
Dijkstra et al. 2010 (FE)	40	400	780	380	0.230137	40°50' N	104°47' W	USA	GC	g pot-1	Low water	Fig. 2 & Fig. 3; TPNP-APNP	Mixtures	No	Grassland	average of five species	0.153114	0.187479	0.0579671	0.0417316	10	10	0.2027	0.0193		0.153114	0.187479	0.0579671	0.0417316	10	10	0.2027	0.0193		*	*	*	*	*	*	*	*
Dijkstra et al. 2010 (FE)	41	400	780	380	0.230137	40°50' N	104°47' W	USA	GC	g pot-1	High water	Fig. 2 & Fig. 3; TPNP-APNP	Mixtures	No	Grassland	average of five species	0.165122	0.209728	0.0546726	0.0730989	10	10	0.2391	0.0231		0.165122	0.209728	0.0546726	0.0730989	10	10	0.2391	0.0231		*	*	*	*	*	*	*	*
Dijkstra et al. 2010 (NP)	42	*	600	*	3	41°11' N	104°54' W	USA	FACE	g m-2	No	Table 2	*	No	Grassland	northern mixed-grass prairie	3.925	3.775	0.64953	0.656591	5	5	-0.039	0.0115		3.925	3.775	0.64953	0.656591	5	5	-0.039	0.0115		*	*	*	*	*	*	*	*
Dijkstra et al. 2010 (NP)	43	*	600	*	3	41°11' N	104°54' W	USA	FACE	g m-2	Warming	Table 2	*	No	Grassland	northern mixed-grass prairie	3.75	4.77	0.678642	0.784573	5	5	0.2406	0.012		3.75	4.77	0.678642	0.784573	5	5	0.2406	0.012		*	*	*	*	*	*	*	*
Franzaring et al. 2012	44	380	550	170	0.389041	*	*	Germany	GC	g plant-1	No	Fig. 3d	*	No	*	*	0.0305714	0.0414286	0.00305714	0.00414286	6	6	0.3023	0.0033		0.0305714	0.0414286	0.00305714	0.00414286	6	6	0.3023	0.0033		*	*	*	*	*	*	*	*
Franzaring et al. 2012	45	380	550	170	0.389041	*	*	Germany	GC	g plant-1	Nitrogen	Fig. 3d	75 kg N ha-1 yr-1	Yes	*	*	0.0601429	0.071	0.00601429	0.0071	6	6	0.1667	0.0033		0.0601429	0.071	0.00601429	0.0071	6	6	0.1667	0.0033		*	*	*	*	*	*	*	*
Hartwig et al. 2002	46	350	600	250	4	47°27'N	8°41'E	Switzerland	FACE	g N m-2 land	Low Nitrogen	Table 1 * Table 2	DM*N concentration	Yes	Grassland	Lolium perenne	2.34	3.672	0.234	0.3672	3	3	0.4506	0.0067		*	*	*	*	*	*	*	*		2.34	3.672	0.234	0.3672	3	3	0.4506	0.0067
Hartwig et al. 2002	47	350	600	250	4	47°27'N	8°41'E	Switzerland	FACE	g N m-2 land	Low Nitrogen	Table 1 * Table 2	DM*N concentration	Yes	Grassland	Trifolium repens	1.6274	1.68	0.16274	0.168	3	3	0.0318	0.0067		*	*	*	*	*	*	*	*		1.6274	1.68	0.16274	0.168	3	3	0.0318	0.0067
Hartwig et al. 2002	48	350	600	250	4	47°27'N	8°41'E	Switzerland	FACE	g N m-2 land	High Nitrogen	Table 1 * Table 2	DM*N concentration	Yes	Grassland	Lolium perenne	5.805	11.4939	0.5805	1.14939	3	3	0.6831	0.0067		*	*	*	*	*	*	*	*		5.805	11.4939	0.5805	1.14939	3	3	0.6831	0.0067
Hartwig et al. 2002	49	350	600	250	4	47°27'N	8°41'E	Switzerland	FACE	g N m-2 land	High Nitrogen	Table 1 * Table 2	DM*N concentration	Yes	Grassland	Trifolium repens	1.3734	2.0025	0.13734	0.20025	3	3	0.3771	0.0067		*	*	*	*	*	*	*	*		1.3734	2.0025	0.13734	0.20025	3	3	0.3771	0.0067
Hibbs et al. 1995	50	350	700	350	0.40274	*	*	USA	GC	mg	No	Table 2	*	No	Forest	Deciduous	0.38	0.57	0.038	0.057	16	16	0.4055	0.0013		0.38	0.57	0.038	0.057	16	16	0.4055	0.0013		*	*	*	*	*	*	*	*
Hibbs et al. 1995	51	350	700	350	0.40274	*	*	USA	GC	mg	Drought	Table 2	*	No	Forest	Deciduous	0.47	0.55	0.047	0.055	16	16	0.1572	0.0013		0.47	0.55	0.047	0.055	16	16	0.1572	0.0013		*	*	*	*	*	*	*	*
Hungate et al. 1996	52	360	710	350	0.416667	37°24' N	122°13' W	USA	OTC	g N m-2 land	No	Fig. 1	*	No	Grassland	Avena fatua	0.221311	0.188525	0.201613	0.0916421	5	5	-0.1604	0.2132		0.221311	0.188525	0.201613	0.0916421	5	5	-0.1604	0.2132		*	*	*	*	*	*	*	*
Hungate et al. 1996	53	360	710	350	0.416667	37°24' N	122°13' W	USA	OTC	g N m-2 land	No	Fig. 1	*	No	Grassland	Bromus hordeaceus	0.0983607	0.122951	0.0549853	0.0366569	5	5	0.2231	0.0803		0.0983607	0.122951	0.0549853	0.0366569	5	5	0.2231	0.0803		*	*	*	*	*	*	*	*
Hungate et al. 1996	54	360	710	350	0.416667	37°24' N	122°13' W	USA	OTC	g N m-2 land	No	Fig. 1	*	No	Grassland	Lolium multiflorum	0.147541	0.0983607	0.0366569	0.0366569	5	5	-0.4048	0.0402		0.147541	0.0983607	0.0366569	0.0366569	5	5	-0.4048	0.0402		*	*	*	*	*	*	*	*
Hungate et al. 1996	55	360	710	350	0.416667	37°24' N	122°13' W	USA	OTC	g N m-2 land	No	Fig. 1	*	No	Grassland	Vulpia michrostachys	0.0901639	0.0819672	0.0549853	0.0366569	5	5	-0.0953	0.1144		0.0901639	0.0819672	0.0549853	0.0366569	5	5	-0.0953	0.1144		*	*	*	*	*	*	*	*
Hungate et al. 1996	56	360	710	350	0.416667	37°24' N	122°13' W	USA	OTC	g N m-2 land	No	Fig. 1	*	No	Grassland	Lasthenia californica	0.131148	0.114754	0.0549853	0.0366569	5	5	-0.1328	0.0556		0.131148	0.114754	0.0549853	0.0366569	5	5	-0.1328	0.0556		*	*	*	*	*	*	*	*
Hungate et al. 1996	57	360	710	350	0.416667	37°24' N	122°13' W	USA	OTC	g N m-2 land	No	Fig. 1	*	No	Grassland	Plantago erecta	0.147541	0.172131	0.0183284	0.0366569	5	5	0.1542	0.0122		0.147541	0.172131	0.0183284	0.0366569	5	5	0.1542	0.0122		*	*	*	*	*	*	*	*
Hungate et al. 1996	58	360	710	350	0.416667	37°24' N	122°13' W	USA	OTC	g N m-2 land	Fertilizer	Fig. 1	*	Yes	Grassland	Avena fatua	1.22951	1.72131	0.183284	0.733137	5	5	0.3365	0.0407		1.22951	1.72131	0.183284	0.733137	5	5	0.3365	0.0407		*	*	*	*	*	*	*	*
Hungate et al. 1996	59	360	710	350	0.416667	37°24' N	122°13' W	USA	OTC	g N m-2 land	Fertilizer	Fig. 1	*	Yes	Grassland	Bromus hordeaceus	1.14754	1.55738	0.549853	0.549853	5	5	0.3054	0.0709		1.14754	1.55738	0.549853	0.549853	5	5	0.3054	0.0709		*	*	*	*	*	*	*	*
Hungate et al. 1996	60	360	710	350	0.416667	37°24' N	122°13' W	USA	OTC	g N m-2 land	Fertilizer	Fig. 1	*	Yes	Grassland	Lolium multiflorum	1.31148	1.47541	0.549853	0.549853	5	5	0.1178	0.0629		1.31148	1.47541	0.549853	0.549853	5	5	0.1178	0.0629		*	*	*	*	*	*	*	*
Hungate et al. 1996	61	360	710	350	0.416667	37°24' N	122°13' W	USA	OTC	g N m-2 land	Fertilizer	Fig. 1	*	Yes	Grassland	Vulpia michrostachys	0.57377	0.491803	0.549853	0.366569	5	5	-0.1542	0.2948		0.57377	0.491803	0.549853	0.366569	5	5	-0.1542	0.2948		*	*	*	*	*	*	*	*
Hungate et al. 1996	62	360	710	350	0.416667	37°24' N	122°13' W	USA	OTC	g N m-2 land	Fertilizer	Fig. 1	*	Yes	Grassland	Lasthenia californica	1.22951	1.80328	0.733137	0.366569	5	5	0.383	0.0794		1.22951	1.80328	0.733137	0.366569	5	5	0.383	0.0794		*	*	*	*	*	*	*	*
Hungate et al. 1996	63	360	710	350	0.416667	37°24' N	122°13' W	USA	OTC	g N m-2 land	Fertilizer	Fig. 1	*	Yes	Grassland	Plantago erecta	1.63934	1.47541	0.366569	0.366569	5	5	-0.1053	0.0224		1.63934	1.47541	0.366569	0.366569	5	5	-0.1053	0.0224		*	*	*	*	*	*	*	*
Iverson et al. 2012	64	396	565	169	12	35°54' N	84°20' W	USA	FACE	g N m-3	No	Table 1	*	No	Forest	Liquidambar styraciflua L.	1.7	2.4	0.173205	0.707107	3	2	0.3448	0.0469		*	*	*	*	*	*	*	*		1.7	2.4	0.173205	0.707107	3	2	0.3448	0.0469
Jastrow et al. 2000	65	380	760	380	8	39.12° N	96.35° W	USA	OTC	g N m-2 land	No	Fig. 2	*	No	Grassland	*	15.5056	23.5206	5.50447	10.275	6	6	0.4167	0.0528		*	*	*	*	*	*	*	*		15.5056	23.5206	5.50447	10.275	6	6	0.4167	0.0528
Jin et al. 2012	66	350	550	200	0.172603	36°42' N	142°11' W	Australia	FACE	mg plant-1	No	Fig. 1b * Table 2	0 mg P kg-1 soil	No	Cropland	Chickpea	4.69895	4.60932	0.469895	0.460932	4	4	-0.0193	0.005		4.69895	4.60932	0.469895	0.460932	4	4	-0.0193	0.005		*	*	*	*	*	*	*	*
Jin et al. 2012	67	350	550	200	0.172603	36°42' N	142°11' W	Australia	FACE	mg plant-1	Phosphorus	Fig. 1b * Table 2	2 mg P kg-1 soil	No	Cropland	Chickpea	5.77083	6.85594	0.577083	0.685594	4	4	0.1723	0.005		5.77083	6.85594	0.577083	0.685594	4	4	0.1723	0.005		*	*	*	*	*	*	*	*
Jin et al. 2012	68	350	550	200	0.172603	36°42' N	142°11' W	Australia	FACE	mg plant-1	Phosphorus	Fig. 1b * Table 2	4 mg P kg-1 soil	No	Cropland	Chickpea	7.33474	8.42887	0.733474	0.842887	4	4	0.139	0.005		7.33474	8.42887	0.733474	0.842887	4	4	0.139	0.005		*	*	*	*	*	*	*	*
Jin et al. 2012	69	350	550	200	0.172603	36°42' N	142°11' W	Australia	FACE	mg plant-1	Phosphorus	Fig. 1b * Table 2	8 mg P kg-1 soil	No	Cropland	Chickpea	10.5865	12.2075	1.05865	1.22075	4	4	0.1425	0.005		10.5865	12.2075	1.05865	1.22075	4	4	0.1425	0.005		*	*	*	*	*	*	*	*
Jin et al. 2012	70	350	550	200	0.172603	36°42' N	142°11' W	Australia	FACE	mg plant-1	Phosphorus	Fig. 1b * Table 2	16 mg P kg-1 soil	No	Cropland	Chickpea	10.4589	13.3011	1.04589	1.33011	4	4	0.2404	0.005		10.4589	13.3011	1.04589	1.33011	4	4	0.2404	0.005		*	*	*	*	*	*	*	*
Jin et al. 2012	71	350	550	200	0.172603	36°42' N	142°11' W	Australia	FACE	mg plant-1	No	Fig. 1b * Table 2	0 mg P kg-1 soil	No	Cropland	Field pea	3.2818	4.02286	0.32818	0.402286	4	4	0.2036	0.005		3.2818	4.02286	0.32818	0.402286	4	4	0.2036	0.005		*	*	*	*	*	*	*	*
Jin et al. 2012	72	350	550	200	0.172603	36°42' N	142°11' W	Australia	FACE	mg plant-1	Phosphorus	Fig. 1b * Table 2	2 mg P kg-1 soil	No	Cropland	Field pea	3.99398	4.92271	0.399398	0.492271	4	4	0.2091	0.005		3.99398	4.92271	0.399398	0.492271	4	4	0.2091	0.005		*	*	*	*	*	*	*	*
Jin et al. 2012	73	350	550	200	0.172603	36°42' N	142°11' W	Australia	FACE	mg plant-1	Phosphorus	Fig. 1b * Table 2	4 mg P kg-1 soil	No	Cropland	Field pea	5.08872	4.81805	0.508872	0.481805	4	4	-0.0547	0.005		5.08872	4.81805	0.508872	0.481805	4	4	-0.0547	0.005		*	*	*	*	*	*	*	*
Jin et al. 2012	74	350	550	200	0.172603	36°42' N	142°11' W	Australia	FACE	mg plant-1	Phosphorus	Fig. 1b * Table 2	8 mg P kg-1 soil	No	Cropland	Field pea	7.12421	7.07669	0.712421	0.707669	4	4	-0.0067	0.005		7.12421	7.07669	0.712421	0.707669	4	4	-0.0067	0.005		*	*	*	*	*	*	*	*
Jin et al. 2012	75	350	550	200	0.172603	36°42' N	142°11' W	Australia	FACE	mg plant-1	Phosphorus	Fig. 1b * Table 2	16 mg P kg-1 soil	No	Cropland	Field pea	8.86977	8.74286	0.886977	0.874286	4	4	-0.0144	0.005		8.86977	8.74286	0.886977	0.874286	4	4	-0.0144	0.005		*	*	*	*	*	*	*	*
Johnson et al. 2004	76	*	542	*	2	35°54' N	84°20' W	USA	FACE	kg N ha-1 land	No	Table 2	*	No	Forest	*	18	32	1.8	3.2	3	2	0.5754	0.0083		18	32	1.8	3.2	3	2	0.5754	0.0083		*	*	*	*	*	*	*	*
Kim et al. 2011	77	380	622	242	0.30137	35°10' N	126°53' E	South_Korea	GC	mg N pot-1	Fertilizer	Table 4	*	Yes	Cropland	Rice	89	76.9	8.9	7.69	6	6	-0.1461	0.0033		89	76.9	8.9	7.69	6	6	-0.1461	0.0033		*	*	*	*	*	*	*	*
Kim et al. 2011	78	380	622	242	0.30137	35°10' N	126°53' E	South_Korea	GC	mg N pot-1	Fertilizer + Temperature	Table 4	*	Yes	Cropland	Rice	91.6	124	9.16	12.4	6	6	0.3029	0.0033		91.6	124	9.16	12.4	6	6	0.3029	0.0033		*	*	*	*	*	*	*	*
Lam et al. 2012 (NCA)	79	390	550	160	0.333333	36°42' S	142°07' E	Australia	FACE	kg ha-1	Nitrogen	Fig. 3	*	Yes	Cropland	Wheat	6.01375	6.58648	0.601375	0.658648	4	4	0.091	0.005		6.01375	6.58648	0.601375	0.658648	4	4	0.091	0.005		*	*	*	*	*	*	*	*
Lam et al. 2012 (NCA)	80	390	550	160	0.333333	36°42' S	142°07' E	Australia	FACE	kg ha-1	Nitrogen + Irrigation	Fig. 3	*	Yes	Cropland	Wheat	6.01375	6.87285	0.601375	0.687285	4	4	0.1335	0.005		6.01375	6.87285	0.601375	0.687285	4	4	0.1335	0.005		*	*	*	*	*	*	*	*
Lam et al. 2012 (BFS)	81	415	550	135	0.333333	40°10' N	116°14' E	China	FACE	kg ha-1	Fertilizer	Table 1; Zhonghua 13	4.8 kg N ha-1 yr-1	Yes	Cropland	Soybean	5.08	6.24	1.57617	1.31636	3	3	0.2057	0.0469		5.08	6.24	1.57617	1.31636	3	3	0.2057	0.0469		*	*	*	*	*	*	*	*
Lam et al. 2012 (BFS)	82	415	550	135	0.333333	40°10' N	116°14' E	China	FACE	kg ha-1	Fertilizer	Table 1; Zhonghua 35	4.8 kg N ha-1 yr-1	Yes	Cropland	Soybean	4.09	4.9	0.450333	1.16047	3	3	0.1807	0.0227		4.09	4.9	0.450333	1.16047	3	3	0.1807	0.0227		*	*	*	*	*	*	*	*
Lam et al. 2013 (PS)	83	390	700	310	0.666667	36°43' S	142°10' E	Australia	GC	mg pot-1	No	Table 2	Sum across depths	No	Cropland	Field pea	4.12	5.42	0.412	0.542	2	2	0.2742	0.01		4.12	5.42	0.412	0.542	2	2	0.2742	0.01		*	*	*	*	*	*	*	*
Lam et al. 2013 (PS_2)	84	390	700	310	0.416667	36°43' S	142°10' E	Australia	GC	mg pot-1	No	Table 4	cereal-legume soil	No	Cropland	wheat	2.65	3.16	0.24	0.86	4	4	0.176	0.0206		2.65	3.16	0.24	0.86	4	4	0.176	0.0206		*	*	*	*	*	*	*	*
Lam et al. 2013 (PS_2)	85	390	700	310	0.416667	36°43' S	142°10' E	Australia	GC	mg pot-1	Residue	Table 4	cereal-legume soil	No	Cropland	wheat	1.94	1.33	0.32	0.38	4	4	-0.3775	0.0272		1.94	1.33	0.32	0.38	4	4	-0.3775	0.0272		*	*	*	*	*	*	*	*
Lam et al. 2013 (PS_2)	86	390	700	310	0.416667	36°43' S	142°10' E	Australia	GC	mg pot-1	No	Table 4	cereal-fallow soil	No	Cropland	wheat	2.19	2.68	0.14	0.56	4	4	0.2019	0.0119		2.19	2.68	0.14	0.56	4	4	0.2019	0.0119		*	*	*	*	*	*	*	*
Lam et al. 2013 (PS_2)	87	390	700	310	0.416667	36°43' S	142°10' E	Australia	GC	mg pot-1	Residue	Table 4	cereal-fallow soil	No	Cropland	wheat	1.57	1.06	0.16	0.2	4	4	-0.3928	0.0115		1.57	1.06	0.16	0.2	4	4	-0.3928	0.0115		*	*	*	*	*	*	*	*
Larsen et al. 2011	88	350	510	160	2	55°53'N	11°58'E	Denmark	FACE	g N m-2	No	Table 2	Sum of species	No	Heathland	*	3.73	3.15	1.34811	1.08444	6	6	-0.169	0.0415		3.73	3.15	1.34811	1.08444	6	6	-0.169	0.0415		*	*	*	*	*	*	*	*
Larsen et al. 2011	89	350	510	160	2	55°53'N	11°58'E	Denmark	FACE	g N m-2	Drought	Table 2	Sum of species	No	Heathland	*	7.25	4.25	4.24052	2.25406	6	6	-0.5341	0.1039		7.25	4.25	4.24052	2.25406	6	6	-0.5341	0.1039		*	*	*	*	*	*	*	*
Larsen et al. 2011	90	350	510	160	2	55°53'N	11°58'E	Denmark	FACE	g N m-2	Warming	Table 2	Sum of species	No	Heathland	*	5.29	4.96	2.8233	1.98212	6	6	-0.0644	0.0741		5.29	4.96	2.8233	1.98212	6	6	-0.0644	0.0741		*	*	*	*	*	*	*	*
Larsen et al. 2011	91	350	510	160	2	55°53'N	11°58'E	Denmark	FACE	g N m-2	Warming + Drought	Table 2	Sum of species	No	Heathland	*	4.5	3.99	2.99219	2.8233	6	6	-0.1203	0.1571		4.5	3.99	2.99219	2.8233	6	6	-0.1203	0.1571		*	*	*	*	*	*	*	*
Mikan et al. 2000	92	367	715	348	2	45°34' N	84°40' W	USA	OTC	g N m-2	Nitrogen	Table 1 * Table 3	20 mg N; Low-N soil	Yes	Forest	P. tremuloides	2.4361	2.3899	0.739937	0.501756	8	8	-0.0191	0.017		2.4361	2.3899	0.739937	0.501756	8	8	-0.0191	0.017		*	*	*	*	*	*	*	*
Mikan et al. 2000	93	367	715	348	2	45°34' N	84°40' W	USA	OTC	g N m-2	Nitrogen	Table 1 * Table 3	20 mg N; High-N soil	Yes	Forest	P. tremuloides	5.988	7.8219	1.44602	1.89146	8	8	0.2672	0.0146		5.988	7.8219	1.44602	1.89146	8	8	0.2672	0.0146		*	*	*	*	*	*	*	*
Niklaus et al. 1998	94	360	630	270	2	47°33' N	7°34' E	Switzerland	GC	kg N ha-1 land	No	Fig. 5	*	No	Grassland	*	3.81679	4.35115	0.431821	0.21591	8	8	0.131	0.0019		3.81679	4.35115	0.431821	0.21591	8	8	0.131	0.0019		*	*	*	*	*	*	*	*
Niklaus et al. 1998	95	360	630	270	2	47°33' N	7°34' E	Switzerland	GC	kg N ha-1 land	Phosphorus	Fig. 5	*	No	Grassland	*	4.19847	4.58015	1.51137	1.51137	8	8	0.087	0.0298		4.19847	4.58015	1.51137	1.51137	8	8	0.087	0.0298		*	*	*	*	*	*	*	*
Niklaus et al. 1998	96	360	630	270	2	47°33' N	7°34' E	Switzerland	GC	kg N ha-1 land	Legume	Fig. 5	*	No	Grassland	*	6.64122	8.39695	1.51137	4.1023	8	8	0.2346	0.0363		6.64122	8.39695	1.51137	4.1023	8	8	0.2346	0.0363		*	*	*	*	*	*	*	*
Niklaus et al. 1998	97	360	630	270	2	47°33' N	7°34' E	Switzerland	GC	kg N ha-1 land	Phosphorus & legume	Fig. 5	*	No	Grassland	*	8.32061	9.84733	2.59093	1.51137	8	8	0.1685	0.0151		8.32061	9.84733	2.59093	1.51137	8	8	0.1685	0.0151		*	*	*	*	*	*	*	*
Niklaus et al. 2003	98	360	600	240	6	47°33' N	7°34' E	Switzerland	OTC	g N m-2 land	No	Fig. 7	*	No	Grassland	*	12.8	14.4	3.67696	1.69706	8	8	0.1178	0.0121		*	*	*	*	*	*	*	*		12.8	14.4	3.67696	1.69706	8	8	0.1178	0.0121
Norby & Iversen 2006	99	319	544	225	6	35°54'N	84°20' W	USA	FACE	kg N ha-1 land	No	Fig. 5b	*	No	Forest	Sweetgum	28.5603	56.4945	6.34697	7.6457	3	2	0.6821	0.0256		26.6041	43.1925	8.66003	7.07244	3	2	0.4846	0.0487		30.5164	69.7966	9.80872	14.3941	3	2	0.8273	0.0557
Oikawa et al. 2010	100	384.7	593	208.3	0.333333	39°44' N	141°7' E	Japan	GC	g plant-1	Fertillizer (nodulated)	Fig. 1	sd; 0.3 g N	Yes	Cropland	Soybean	0.0437209	0.0494574	0.0153356	0.00716664	5	5	0.1246	0.0287		0.0437209	0.0494574	0.0153356	0.00716664	5	5	0.1246	0.0287		*	*	*	*	*	*	*	*
Oikawa et al. 2010	101	384.7	593	208.3	0.333333	39°44' N	141°7' E	Japan	GC	g plant-1	Fertillizer (non-nodulated)	Fig. 1	sd; 0.3 g N	Yes	Cropland	Soybean	0.044031	0.0510078	0.00496971	0.005902	5	5	0.1476	0.0053		0.044031	0.0510078	0.00496971	0.005902	5	5	0.1476	0.0053		*	*	*	*	*	*	*	*
Pang et al. 2006	102	*	*	200	0.333333	31°37' N	120°28' E	China	FACE	g pot-1	Low Nitrogen	Table 1	14 mg N L-1	Yes	Cropland	Rice	0.035	0.038	0.0035	0.0038	3	3	0.0822	0.0067		0.035	0.038	0.0035	0.0038	3	3	0.0822	0.0067		*	*	*	*	*	*	*	*
Pang et al. 2006	103	*	*	200	0.333333	31°37' N	120°28' E	China	FACE	g pot-1	High Nitrogen	Table 1	28 mg N L-1	Yes	Cropland	Rice	0.052	0.062	0.0052	0.0062	3	3	0.1759	0.0067		0.052	0.062	0.0052	0.0062	3	3	0.1759	0.0067		*	*	*	*	*	*	*	*
Perez-Lopez et al. 2013	104	350	700	350	0.0767123	*	*	Canada	GC	mg plant-1	Fertilizer	Fig. 5c	10.5 g N day-1 m-3	Yes	Cropland	Barley	7.87879	8.63636	0.74227	0.371135	6	6	0.0918	0.0018		7.87879	8.63636	0.74227	0.371135	6	6	0.0918	0.0018		*	*	*	*	*	*	*	*
Perez-Lopez et al. 2013	105	350	700	350	0.0767123	*	*	Canada	GC	mg plant-1	Fertilizer	Fig. 5c	10.5 g N day-1 m-3	Yes	Cropland	Barley	7.87879	8.33333	0.371135	0.74227	6	6	0.0561	0.0017		7.87879	8.33333	0.371135	0.74227	6	6	0.0561	0.0017		*	*	*	*	*	*	*	*
Perez-Lopez et al. 2013	106	350	700	350	0.0767123	*	*	Canada	GC	mg plant-1	Fertilizer	Fig. 5c	10.5 g N day-1 m-3	Yes	Cropland	Barley	6.66667	7.12121	1.1134	0.371135	6	6	0.066	0.0051		6.66667	7.12121	1.1134	0.371135	6	6	0.066	0.0051		*	*	*	*	*	*	*	*
Perez-Lopez et al. 2013	107	350	700	350	0.0767123	*	*	Canada	GC	mg plant-1	Fertilizer	Fig. 5c	10.5 g N day-1 m-3	Yes	Cropland	Barley	5.30303	6.21212	0.371135	0.371135	6	6	0.1582	0.0014		5.30303	6.21212	0.371135	0.371135	6	6	0.1582	0.0014		*	*	*	*	*	*	*	*
Polley et al. 1997	108	385	690	305	1.08333	*	*	*	GC	g container-1	No	Fig. 4	385 ppm vs. 690 ppm	No	Forest	A. smallii	3.60577	8.89423	0.360577	0.889423	3	3	0.9029	0.0067		3.60577	8.89423	0.360577	0.889423	3	3	0.9029	0.0067		*	*	*	*	*	*	*	*
Polley et al. 1997	109	385	980	595	1.08333	*	*	*	GC	g container-1	No	Fig. 4	385 ppm vs. 980 ppm	No	Forest	A. smallii	3.60577	10.0962	0.360577	1.00962	3	3	1.0296	0.0067		3.60577	10.0962	0.360577	1.00962	3	3	1.0296	0.0067		*	*	*	*	*	*	*	*
Pregitzer et al. 1995	110	245	693	448	0.432877	45°34' N	84°40' W	USA	OTC	g N chamber-1	No	Table 1 * Table 2	Low-N soil	No	Forest	Populus x euramericana	2.10784	2.33258	0.361745	0.54362	5	5	0.1013	0.0168		2.10784	2.33258	0.361745	0.54362	5	5	0.1013	0.0168		*	*	*	*	*	*	*	*
Pregitzer et al. 1995	111	245	693	448	0.432877	45°34' N	84°40' W	USA	OTC	g N chamber-1	No	Table 1 * Table 2	High-N soil	No	Forest	Populus x euramericana	5.02974	6.59218	0.320623	0.472762	5	5	0.2705	0.0018		5.02974	6.59218	0.320623	0.472762	5	5	0.2705	0.0018		*	*	*	*	*	*	*	*
Roy et al. 2012	112	390	550	160	0.25	20°25'N	85°55'E	India	OTC	g N m-2	Fertillizer + warming	Table 2	100 kg N ha-1	Yes	Cropland	Rice	1.898	2.276	0.1898	0.2276	5	5	0.1816	0.004		1.898	2.276	0.1898	0.2276	5	5	0.1816	0.004		*	*	*	*	*	*	*	*
Runion et al. 1999	113	372.3	739.5	367.2	1.66667	*	*	*	OTC	g	No	Table 1 (Biomass)* Table 3 (nitrogen)	Water stress 1	No	Forest	Pine	2.80523	3.07352	0.280523	0.307352	5	5	0.0913	0.004		2.80523	3.07352	0.280523	0.307352	5	5	0.0913	0.004		*	*	*	*	*	*	*	*
Runion et al. 1999	114	372.3	739.5	367.2	1.66667	*	*	*	OTC	g	No	Table 1 (Biomass)* Table 3 (nitrogen)	Water stress 2	No	Forest	Pine	0.5796	1.00702	0.05796	0.100702	5	5	0.5524	0.004		0.5796	1.00702	0.05796	0.100702	5	5	0.5524	0.004		*	*	*	*	*	*	*	*
Soussana et al. 1996	115	350	700	350	2	*	*	France	GC	kg N ha-1	Low Nitrogen	Table 3	N- (160 kg N fertilizer ha -1 y-1)	Yes	Grassland	Ryegrass	62	74	4	20	4	4	0.1769	0.0193		62	74	4	20	4	4	0.1769	0.0193		*	*	*	*	*	*	*	*
Soussana et al. 1996	116	350	700	350	2	*	*	France	GC	kg N ha-1	High Nitrogen	Table 3	N+ (530 kg N fertilizer ha -1 y-1)	Yes	Grassland	Ryegrass	83	116	20	40	4	4	0.3347	0.0442		83	116	20	40	4	4	0.3347	0.0442		*	*	*	*	*	*	*	*
Soussana et al. 1996	117	350	700	350	2	*	*	France	GC	kg N ha-1	Low Nitrogen + warming	Table 3	N- (160 kg N fertilizer ha -1 y-1)	Yes	Grassland	Ryegrass	62	81	4	18	4	4	0.2673	0.0134		62	81	4	18	4	4	0.2673	0.0134		*	*	*	*	*	*	*	*
Soussana et al. 1996	118	350	700	350	2	*	*	France	GC	kg N ha-1	High Nitrogen + warming	Table 3	N+ (530 kg N fertilizer ha -1 y-1)	Yes	Grassland	Ryegrass	83	104	20	18	4	4	0.2256	0.022		83	104	20	18	4	4	0.2256	0.022		*	*	*	*	*	*	*	*
Tingey et al. 2003	119	*	*	180	4	*	*	USA	OTC	g plant-1	Warming	Fig. 3a (root), only AC and EC	*	No	Forest	P. menziesii	1.00971	0.939806	0.100971	0.0939806	5	5	-0.0717	0.004		*	*	*	*	*	*	*	*		1.00971	0.939806	0.100971	0.0939806	5	5	-0.0717	0.004
Verburg et al. 2004	120	365	700	335	0.213699	*	*	*	GC	mg plant-1	No	Fig. 3	unlabeled; sum of tissues	No	Forest	Pine	866.207	781.609	187.55	202.6	4	4	-0.1028	0.0285		866.207	781.609	187.55	202.6	4	4	-0.1028	0.0285		*	*	*	*	*	*	*	*
Verburg et al. 2004	121	365	700	335	0.213699	*	*	*	GC	mg plant-1	No	Fig. 3	labeled; sum of tissues	No	Forest	Pine	671.264	640	194.247	101.999	4	4	-0.0477	0.0273		671.264	640	194.247	101.999	4	4	-0.0477	0.0273		*	*	*	*	*	*	*	*
Vogel et al. 1997	122	349	695	346	0.438356	45°34' N	84°40' W	USA	OTC	g plant-1	No	Table 3	*	No	Forest	Black alder	0.51	0.754	0.0496488	0.109772	5	5	0.391	0.0061		0.51	0.754	0.0496488	0.109772	5	5	0.391	0.0061		*	*	*	*	*	*	*	*
Zak et al. 2007	123	374	531	157	7	45°40.5' N	89°37.5' W	USA	FACE	g N m-2 land	O3; average of contral and O3	Table 1	*	No	Forest	Across plant community type	0.36	0.54	0.155885	0.415692	3	3	0.4055	0.2601		*	*	*	*	*	*	*	*		0.36	0.54	0.155885	0.415692	3	3	0.4055	0.2601
Zak et al. 2000b	124	367	715	348	2.5	45°34' N	84°40' W	USA	OTC	g N chamber-1	Nitrogen	Table 3	20 mg N; Low-N soil	Yes	Forest	P. tremuloides	11.2	13.1	2.728	3.8684	5	5	0.1567	0.0293		11.2	13.1	2.728	3.8684	5	5	0.1567	0.0293		*	*	*	*	*	*	*	*
Zak et al. 2000b	125	367	715	348	2.5	45°34' N	84°40' W	USA	OTC	g N chamber-1	Nitrogen	Table 3	20 mg N; High-N soil	Yes	Forest	P. tremuloides	44.7	45.7	5.45601	3.55535	5	5	0.0221	0.0042		44.7	45.7	5.45601	3.55535	5	5	0.0221	0.0042		*	*	*	*	*	*	*	*
Zanetti et al. 1996	126	350	600	250	2	47°27'N	8°41'E	Switzerland	FACE	g N m-2	Low Nitrogen	Table III	17 g N m-2	Yes	Cropland	White clover	6.735	8.685	0.6735	0.8685	3	3	0.2543	0.0067		6.735	8.685	0.6735	0.8685	3	3	0.2543	0.0067		*	*	*	*	*	*	*	*
Zanetti et al. 1996	127	350	600	250	2	47°27'N	8°41'E	Switzerland	FACE	g N m-2	High Nitrogen	Table III	51.3 g N m-2	Yes	Cropland	White clover	6.895	7.91	0.6895	0.791	3	3	0.1373	0.0067		6.895	7.91	0.6895	0.791	3	3	0.1373	0.0067		*	*	*	*	*	*	*	*

## Sheet: TPNP
																	Total									Short-term									Long-term
Reference	Obs	Ambient CO2 (ppm)	Elevated CO2 (ppm)	CO2 difference (ppm)	Treatment duration (years)	Latitude	Longitude	Country	Fercility	Unit	Other treatments	Data location	Notes	Nitrogen addition	Ecosystem	Vegetation	Mean_a	Mean_e	Std_a	Std_e	N_a	N_e	lnR	Var(lnR)		Mean_a	Mean_e	Std_a	Std_e	N_a	N_e	lnR	Var(lnR)		Mean_a	Mean_e	Std_a	Std_e	N_a	N_e	lnR	Var(lnR)
Andresen et al 2010 (Biogeochemistry)	1	*	510	*	2	55°53' N	11°58' E	Denmark	FACE	g N m-2 land	No	Fig. 5; average of Deschampsia flexuosa and Calluna vulgaris	*	No	Grassland	Evergreen shrub + Grass	18.0257	14.4134	9.72573	7.33592	6	6	-0.2236	0.0917		18.0257	14.4134	9.72573	7.33592	6	6	-0.2236	0.0917		*	*	*	*	*	*	*	*
Andresen et al 2010 (Biogeochemistry)	2	*	510	*	2	55°53' N	11°58' E	Denmark	FACE	g N m-2 land	Drought	Fig. 5; average of Deschampsia flexuosa and Calluna vulgaris	*	No	Grassland	Evergreen shrub + Grass	19.5495	21.4199	7.15126	8.82241	6	6	0.0914	0.0506		19.5495	21.4199	7.15126	8.82241	6	6	0.0914	0.0506		*	*	*	*	*	*	*	*
Andresen et al 2010 (Biogeochemistry)	3	*	510	*	2	55°53' N	11°58' E	Denmark	FACE	g N m-2 land	Warming	Fig. 5; average of Deschampsia flexuosa and Calluna vulgaris	*	No	Grassland	Evergreen shrub + Grass	16.9538	13.8084	7.03037	7.52369	6	6	-0.2052	0.0781		16.9538	13.8084	7.03037	7.52369	6	6	-0.2052	0.0781		*	*	*	*	*	*	*	*
Andresen et al 2010 (Biogeochemistry)	4	*	510	*	2	55°53' N	11°58' E	Denmark	FACE	g N m-2 land	Drought + Warming	Fig. 5; average of Deschampsia flexuosa and Calluna vulgaris	*	No	Grassland	Evergreen shrub + Grass	17.803	15.6839	6.4862	8.08733	6	6	-0.1267	0.0664		17.803	15.6839	6.4862	8.08733	6	6	-0.1267	0.0664		*	*	*	*	*	*	*	*
Aranjuelo et al 2005	5	405	730	325	0.164384	40.95° N	5.50° W	Spain	GC	mg N plant-1	No	Fig. 3 * Fig. 7	*	No	Grassland	Alfalfa	48.7081	49.1364	4.87081	4.91364	4	4	0.0088	0.005		48.7081	49.1364	4.87081	4.91364	4	4	0.0088	0.005		*	*	*	*	*	*	*	*
Aranjuelo et al 2005	6	405	730	325	0.164384	40.95° N	5.50° W	Spain	GC	mg N plant-1	Warming	Fig. 3 * Fig. 8	*	No	Grassland	Alfalfa	50.7135	64.8394	5.07135	6.48394	4	4	0.2457	0.005		50.7135	64.8394	5.07135	6.48394	4	4	0.2457	0.005		*	*	*	*	*	*	*	*
Aranjuelo et al 2005	7	405	730	325	0.164384	40.95° N	5.50° W	Spain	GC	mg N plant-1	Drought	Fig. 3 * Fig. 9	*	No	Grassland	Alfalfa	22.8079	23.6859	2.28079	2.36859	4	4	0.0378	0.005		22.8079	23.6859	2.28079	2.36859	4	4	0.0378	0.005		*	*	*	*	*	*	*	*
Aranjuelo et al 2005	8	405	730	325	0.164384	40.95° N	5.50° W	Spain	GC	mg N plant-1	Drought + Warming	Fig. 3 * Fig. 10	*	No	Grassland	Alfalfa	23.5191	36.7361	2.35191	3.67361	4	4	0.4459	0.005		23.5191	36.7361	2.35191	3.67361	4	4	0.4459	0.005		*	*	*	*	*	*	*	*
Aranjuelo et al. 2011	9	350	700	350	0.583333	*	*	Spain	GC	g plant-1	No	Table 1 * Fig. 3	*	No	Forest	Evergreen Broadleaf	0.522799	0.63854	0.114628	0.0699946	8	8	0.1999	0.0075		0.522799	0.63854	0.114628	0.0699946	8	8	0.1999	0.0075		*	*	*	*	*	*	*	*
Arnone 1997	10	335	680	345	2	46°34N	8°25E	Switzerland	OTC	g N m-2	No	Fig. 1a	*	No	Grassland	sedge	6.19936	5.78778	1.01727	1.53505	12	12	-0.0687	0.0081		6.19936	5.78778	1.01727	1.53505	12	12	-0.0687	0.0081		*	*	*	*	*	*	*	*
Arnone & Gordon 1990	11	350	650	300	0.128767	*	*	USA	GC	mg	Nitrogen	Table 4	*	Yes	Forest	Broadleaf	18.5	27.6	12.0748	10.2191	5	3	0.4	0.1309		18.5	27.6	12.0748	10.2191	5	3	0.4	0.1309		*	*	*	*	*	*	*	*
Arnone & Gordon 1990	12	350	650	300	0.128767	*	*	USA	GC	mg	Nodulation	Table 4	*	No	Forest	Broadleaf	50.9	55.6	4.02492	14.5344	5	5	0.0883	0.0149		50.9	55.6	4.02492	14.5344	5	5	0.0883	0.0149		*	*	*	*	*	*	*	*
Arnone & Gordon 1990	13	350	650	300	0.128767	*	*	USA	GC	mg	Nodulation + Nitrogen	Table 4	*	Yes	Forest	Broadleaf	75.9	119.3	17.8885	35.8535	5	3	0.4522	0.0412		75.9	119.3	17.8885	14.5344	5	3	0.4522	0.0412		*	*	*	*	*	*	*	*
Barnard et al. 2004 (NP)	14	365	665	300	1.25	*	*	*	GC	g N m-2 land	No	Fig.2c; APNP+BPNP	*	No	Grassland	Holcus	6.73994	6.81579	0.771767	0.371077	6	6	0.0112	0.0027		6.73994	6.81579	0.771767	0.371077	6	6	0.0112	0.0027		*	*	*	*	*	*	*	*
Barnard et al. 2004 (NP)	15	365	665	300	1.25	*	*	*	GC	g N m-2 land	No	Fig.6c; APNP+BPNP	Mesocosm	No	Grassland	Festuca	6.27346	7.56032	0.830667	1.33941	6	6	0.1866	0.0082		6.27346	7.56032	0.830667	1.33941	6	6	0.1866	0.0082		*	*	*	*	*	*	*	*
Berntson & Bazzaz 1997	16	375	700	325	2	*	*	USA	GC	g N m-2	No	Fig. 1	*	No	Forest	Yellow birch	2.72	2.96	0.269444	0.269444	6	6	0.0846	0.003		2.72	2.96	0.269444	0.269444	6	6	0.0846	0.003		*	*	*	*	*	*	*	*
Berntson & Bazzaz 1998	17	375	700	325	2	*	*	USA	GC	g N m-2	No	Table 1	*	No	Forest	Yellow birch & White birch	10.6	10.9	1.03923	1.38564	3	3	0.0279	0.0086		10.6	10.9	1.03923	1.38564	3	3	0.0279	0.0086		*	*	*	*	*	*	*	*
Billes et al. 1993	18	350	700	350	0.0767123	*	*	*	GC	mg pot-1	Fertillizer without N	Table 1	*	No	Cropland	Wheat	20.1	22.9	2.01	2.29	4	4	0.1304	0.005		20.1	22.9	2.01	2.29	4	4	0.1304	0.005		*	*	*	*	*	*	*	*
Billes et al. 1993	19	350	700	350	0.0767123	*	*	*	GC	mg pot-1	Fertillizer witht N	Table 1	50 kg N ha-1; from Zak et al. 2000 (New Phytologist; Table 6)	Yes	Cropland	Wheat	29.1	38.4	2.91	3.84	4	4	0.2773	0.005		29.1	38.4	2.91	3.84	4	4	0.2773	0.005		*	*	*	*	*	*	*	*
Bloor et al. 2009	20	380	645	265	0.333333	*	*	France	GC	mg	No	Fig. 1; Fraxinus without competition	No COMP	No	Grassland	*	5.46718	4.88803	2.04597	0.771815	6	6	-0.112	0.0275		5.46718	4.88803	2.04597	0.771815	6	6	-0.112	0.0275		*	*	*	*	*	*	*	*
Bloor et al. 2009	21	380	645	265	0.333333	*	*	France	GC	mg	No	Table 1 and Fig. 1; Sum of the two plants	COMP	No	Grassland	*	297.712	306.205	31.6848	37.5788	6	6	0.0281	0.0044		297.712	306.205	31.6848	37.5788	6	6	0.0281	0.0044		*	*	*	*	*	*	*	*
Bloor et al. 2009	22	380	645	265	0.333333	*	*	France	GC	mg	Nitrogen	Fig. 1; Fraxinus without competition	No COMP	Yes	Grassland	*	6.41699	7.87645	1.67662	1.58987	6	6	0.2049	0.0182		6.41699	7.87645	1.67662	1.58987	6	6	0.2049	0.0182		*	*	*	*	*	*	*	*
Bloor et al. 2009	23	380	645	265	0.333333	*	*	France	GC	mg	Nitrogen	Table 1 and Fig. 1; Sum of the two plants	COMP	Yes	Grassland	*	100.089	97.412	10.6776	11.528	6	6	-0.0271	0.0042		100.089	97.412	10.6776	11.528	6	6	-0.0271	0.0042		*	*	*	*	*	*	*	*
Bradford et al. 2012	24	375	550	175	0.5	*	*	*	GC	g N m-2	No	Table 2 (ANP + BNP)	375 ppm vs. 550 ppm	No	Grassland	*	18.7	15.7	4.70532	4.75605	3	3	-0.1749	0.0517		18.7	15.7	4.70532	4.75605	3	3	-0.1749	0.0517		*	*	*	*	*	*	*	*
Bradford et al. 2012	25	375	550	175	0.5	*	*	*	GC	g N m-2	Low Nitrogen	Table 2 (ANP + BNP)	375 ppm vs. 550 ppm	Yes	Grassland	*	20.2	22	2.41247	6.12862	6	6	0.0854	0.0153		20.2	22	2.41247	6.12862	6	6	0.0854	0.0153		*	*	*	*	*	*	*	*
Bradford et al. 2012	26	375	550	175	0.5	*	*	*	GC	g N m-2	High Nitrogen	Table 2 (ANP + BNP)	375 ppm vs. 550 ppm	Yes	Grassland	*	26.9	33.5	3.73095	4.10609	6	6	0.2194	0.0057		26.9	33.5	3.73095	4.10609	6	6	0.2194	0.0057		*	*	*	*	*	*	*	*
Bradford et al. 2012	27	375	700	325	0.5	*	*	*	GC	g N m-2	No	Table 2 (ANP + BNP)	375 ppm vs. 700 ppm	No	Grassland	*	18.7	22	4.70532	8.14801	3	3	0.1625	0.0668		18.7	22	4.70532	8.14801	3	3	0.1625	0.0668		*	*	*	*	*	*	*	*
Bradford et al. 2012	28	375	700	325	0.5	*	*	*	GC	g N m-2	Low Nitrogen	Table 2 (ANP + BNP)	375 ppm vs. 700 ppm	Yes	Grassland	*	20.2	24.8	2.41247	3.73095	6	6	0.2052	0.0061		20.2	24.8	2.41247	3.73095	6	6	0.2052	0.0061		*	*	*	*	*	*	*	*
Bradford et al. 2012	29	375	700	325	0.5	*	*	*	GC	g N m-2	High Nitrogen	Table 2 (ANP + BNP)	375 ppm vs. 700 ppm	Yes	Grassland	*	26.9	40.2	3.73095	6.9282	6	6	0.4017	0.0082		26.9	40.2	3.73095	6.9282	6	6	0.4017	0.0082		*	*	*	*	*	*	*	*
Cabrerizo et al. 2001	30	360	1000	640	0.0767123	*	*	*	GC	mg plant-1	No	Table 1	Controlled environment chambers	No	Cropland	Pea	29	40	4	16	16	16	0.3216	0.0112		29	40	4	16	16	16	0.3216	0.0112		*	*	*	*	*	*	*	*
Calfapietra et al. 2007	31	370	550	180	3	42°37'N	11°51'E	Italy	FACE	g N m-2 land	No	Fig. 1	*	No	Forest	Sum of different species	191	192	11.3578	7.14143	3	3	0.0052	0.0016		191	192	11.3578	7.14143	3	3	0.0052	0.0016		*	*	*	*	*	*	*	*
Daepp et al. 2001	32	350	600	250	2	47°27'N	8°41'E	Switzerland	FACE	g m-2	Nitrogen	Fig. 2	Nitrogen level 1; different experiment from Daepp et al. 2000	Yes	Grassland	Lolium perenne; ANP + BNP	15.4073	17.1169	1.54073	1.71169	6	6	0.1052	0.0033		15.4073	17.1169	1.54073	1.71169	6	6	0.1052	0.0033		*	*	*	*	*	*	*	*
Daepp et al. 2001	33	350	600	250	2	47°27'N	8°41'E	Switzerland	FACE	g m-2	Nitrogen	Fig. 2	Nitrogen level 2; different experiment from Daepp et al. 2000	Yes	Grassland	Lolium perenne; ANP + BNP	25.1829	29.0048	2.51829	2.90048	6	6	0.1413	0.0033		25.1829	29.0048	2.51829	2.90048	6	6	0.1413	0.0033		*	*	*	*	*	*	*	*
Daepp et al. 2001	34	350	600	250	2	47°27'N	8°41'E	Switzerland	FACE	g m-2	Nitrogen	Fig. 2	Nitrogen level 3; different experiment from Daepp et al. 2000	Yes	Grassland	Lolium perenne; ANP + BNP	30.7225	38.509	3.07225	3.8509	6	6	0.2259	0.0033		30.7225	38.509	3.07225	3.8509	6	6	0.2259	0.0033		*	*	*	*	*	*	*	*
Daepp et al. 2000	35	350	600	250	6	47°27'N	8°41'E	Switzerland	FACE	g m-2	Nitrogen	Table 2	Low N; different experiment from Daepp et al. 2001	Yes	Grassland	Lolium perenne; ANP + BNP	93.6	78.2	9.36	7.82	6	6	-0.1798	0.0033		*	*	*	*	*	*	*	*		93.6	78.2	9.36	7.82	6	6	-0.1798	0.0033
Daepp et al. 2000	36	350	600	250	6	47°27'N	8°41'E	Switzerland	FACE	g m-2	Nitrogen	Table 2	High N; different experiment from Daepp et al. 2001	Yes	Grassland	Lolium perenne; ANP + BNP	285.8	272.7	28.58	27.27	6	6	-0.0469	0.0033		*	*	*	*	*	*	*	*		285.8	272.7	28.58	27.27	6	6	-0.0469	0.0033
Dakora & Drake 2000	37	364	660	296	0.333333	38°51' N	75°36' W	USA	OTC	mg plant-1	No	Fig. 3	Sediment material	No	Grassland	Spartina	1.81034	2.01149	0	0.492713	6	6	0.1054	0.01		1.81034	2.01149	0	0.492713	6	6	0.1054	0.01		*	*	*	*	*	*	*	*
Dakora & Drake 2000	38	364	665	301	0.333333	38°51' N	75°36' W	USA	OTC	mg plant-1	No	Fig. 3	Sediment material	No	Grassland	Scirpus	26.7529	19.5115	5.91256	6.40527	6	6	-0.3156	0.0261		26.7529	19.5115	5.91256	6.40527	6	6	-0.3156	0.0261		*	*	*	*	*	*	*	*
Dakora & Drake 2000	39	364	660	296	0.333333	38°51' N	75°36' W	USA	OTC	mg plant-1	No	Fig. 7	Sediment-free material	No	Grassland	Spartina	0.847458	1.18644	0.415168	0.415168	6	6	0.3364	0.0604		0.847458	1.18644	0.415168	0.415168	6	6	0.3364	0.0604		*	*	*	*	*	*	*	*
Dakora & Drake 2000	40	364	665	301	0.333333	38°51' N	75°36' W	USA	OTC	mg plant-1	No	Fig. 7	Sediment-free material	No	Grassland	Scirpus	23.2203	16.6102	7.88819	6.64268	6	6	-0.335	0.0459		23.2203	16.6102	7.88819	6.64268	6	6	-0.335	0.0459		*	*	*	*	*	*	*	*
de Graaff et al. 2009	41	392	792	400	0.0876712	*	*	USA	GC	mg plant-1	No	Fig. 3b	Wild; Sum of shoot and root	No	Cropland	Wheat	6.37974	6.98658	0.176985	1.22873	3	3	0.0909	0.0106		6.37974	6.98658	0.176985	1.22873	3	3	0.0909	0.0106		*	*	*	*	*	*	*	*
de Graaff et al. 2009	42	392	792	400	0.0876712	*	*	USA	GC	mg plant-1	No	Fig. 3b	Cultivated; Sum of shoot and root	No	Cropland	Wheat	5.37818	6.53758	0.452277	0.42407	3	3	0.1952	0.0038		5.37818	6.53758	0.452277	0.42407	3	3	0.1952	0.0038		*	*	*	*	*	*	*	*
Dijkstra et al. 2010 (FE)	43	400	780	380	0.230137	40°50' N	104°47' W	USA	GC	g pot-1	Low water	Fig. 2	Monocultures	No	Grassland	average of five species	0.373494	0.355422	0.0444497	0.0317498	10	10	-0.0497	0.0022		0.373494	0.355422	0.0444497	0.0317498	10	10	-0.0497	0.0022		*	*	*	*	*	*	*	*
Dijkstra et al. 2010 (FE)	44	400	780	380	0.230137	40°50' N	104°47' W	USA	GC	g pot-1	High water	Fig. 2	Monocultures	No	Grassland	average of five species	0.401606	0.403614	0.0444497	0.0380997	10	10	0.005	0.0021		0.401606	0.403614	0.0444497	0.0380997	10	10	0.005	0.0021		*	*	*	*	*	*	*	*
Dijkstra et al. 2010 (FE)	45	400	780	380	0.230137	40°50' N	104°47' W	USA	GC	g pot-1	Low water	Fig. 2	Mixtures	No	Grassland	average of five species	0.355422	0.331325	0.0507996	0.0380997	10	10	-0.0702	0.0034		0.355422	0.331325	0.0507996	0.0380997	10	10	-0.0702	0.0034		*	*	*	*	*	*	*	*
Dijkstra et al. 2010 (FE)	46	400	780	380	0.230137	40°50' N	104°47' W	USA	GC	g pot-1	High water	Fig. 2	Mixtures	No	Grassland	average of five species	0.35743	0.393574	0.0444497	0.0698495	10	10	0.0965	0.0047		0.35743	0.393574	0.0444497	0.0698495	10	10	0.0965	0.0047		*	*	*	*	*	*	*	*
Dijkstra et al. 2010 (NP)	47	*	600	*	3	41°11' N	104°54' W	USA	FACE	g m-2	No	Fig. 3 + Table 2	Sum of ANP and BNP	No	Grassland	northern mixed-grass prairie	5.23808	4.8778	0.657917	0.674382	5	5	-0.0713	0.007		5.23808	4.8778	0.657917	0.674382	5	5	-0.0713	0.007		*	*	*	*	*	*	*	*
Dijkstra et al. 2010 (NP)	48	*	600	*	3	41°11' N	104°54' W	USA	FACE	g m-2	Warming	Fig. 3 + Table 2	Sum of ANP and BNP	No	Grassland	northern mixed-grass prairie	5.24533	6.17654	0.714857	0.803216	5	5	0.1634	0.0071		5.24533	6.17654	0.714857	0.803216	5	5	0.1634	0.0071		*	*	*	*	*	*	*	*
Duan et al. 2013	49	350	700	350	0.5	31°41'N	103°54'E	China	GC	g N plant-1	No	Fig. 2d	*	No	Forest	P. yunnanensis	0.350534	0.282918	0.0391459	0.0533808	4	4	-0.2143	0.012		0.350534	0.282918	0.0391459	0.0533808	4	4	-0.2143	0.012		*	*	*	*	*	*	*	*
Duan et al. 2013	50	350	700	350	0.5	31°41'N	103°54'E	China	GC	g N plant-1	No	Fig. 2d	*	No	Forest	A. faxoniana	0.338078	0.336299	0.0355872	0.0427046	4	4	-0.0053	0.0068		0.338078	0.336299	0.0355872	0.0427046	4	4	-0.0053	0.0068		*	*	*	*	*	*	*	*
Duan et al. 2013	51	350	700	350	0.5	31°41'N	103°54'E	China	GC	g N plant-1	Warming	Fig. 2d	*	No	Forest	P. yunnanensis	0.339858	0.311388	0.0177936	0.0462633	4	4	-0.0876	0.0062		0.339858	0.311388	0.0177936	0.0462633	4	4	-0.0876	0.0062		*	*	*	*	*	*	*	*
Duan et al. 2013	52	350	700	350	0.5	31°41'N	103°54'E	China	GC	g N plant-1	Warming	Fig. 2d	*	No	Forest	A. faxoniana	0.425267	0.354093	0.0427046	0.0498221	4	4	-0.1832	0.0075		0.425267	0.354093	0.0427046	0.0498221	4	4	-0.1832	0.0075		*	*	*	*	*	*	*	*
Feng & Flessa 2004	53	350	700	350	0.306849	*	*	*	GC	g N	Nitrogen	Table 1	N concentration * dry mass/100	Yes	Forest	Black locust	0.106425	0.160988	0.01419	0.01336	6	6	0.4142	0.0041		0.106425	0.160988	0.01419	0.01336	6	6	0.4142	0.0041		*	*	*	*	*	*	*	*
Finzi et al. 2002	54	365	560	195	4	35°58' N	79°5' W	USA	FACE	g N m-2 land	No	Table 2	*	No	Forest	Pine	38.4325	39.4675	3.0431	2.74555	3	3	0.0266	0.0037		38.3933	39.2267	3.54802	3.0572	3	3	0.0215	0.0049		38.55	40.19	7.25729	7.32657	3	3	0.0417	0.0229
Franzaring et al. 2012	55	380	550	170	0.389041	*	*	Germany	GC	g plant-1	No	Fig. 3 (a+b+c+d)	0 g N	No	*	*	0.235893	0.249713	0.0235893	0.0249713	6	6	0.0569	0.0033		0.235893	0.249713	0.0235893	0.0249713	6	6	0.0569	0.0033		*	*	*	*	*	*	*	*
Franzaring et al. 2012	56	380	550	170	0.389041	*	*	Germany	GC	g plant-1	Nitrogen	Fig. 3 (a+b+c+d)	75 kg N ha-1 yr-1	Yes	*	*	0.37845	0.383412	0.037845	0.0383412	6	6	0.0131	0.0033		0.37845	0.383412	0.037845	0.0383412	6	6	0.0131	0.0033		*	*	*	*	*	*	*	*
Hagedorn et al. 2000	57	370	570	200	4	*	*	Switzerland	OTC	g m-2	Low Nitrogen	Fig. 4	Acidic loam	Yes	Forest	*	14.8805	15.4266	1.63823	1.91126	4	4	0.036	0.0069		*	*	*	*	*	*	*	*		14.8805	15.4266	1.63823	1.91126	4	4	0.036	0.0069
Hagedorn et al. 2000	58	370	570	200	4	*	*	Switzerland	OTC	g m-2	Low Nitrogen	Fig. 4	Calcareous sand	Yes	Forest	*	32.3549	33.3106	1.36519	2.45734	4	4	0.0291	0.0018		*	*	*	*	*	*	*	*		32.3549	33.3106	1.36519	2.45734	4	4	0.0291	0.0018
Hagedorn et al. 2000	59	370	570	200	4	*	*	Switzerland	OTC	g m-2	High Nitrogen	Fig. 4	Acidic loam	Yes	Forest	*	23.0717	22.6621	2.30717	2.26621	4	4	-0.0179	0.005		*	*	*	*	*	*	*	*		23.0717	22.6621	2.30717	2.26621	4	4	-0.0179	0.005
Hagedorn et al. 2000	60	370	570	200	4	*	*	Switzerland	OTC	g m-2	High Nitrogen	Fig. 4	Calcareous sand	Yes	Forest	*	34.1297	40.6826	3.41297	4.06826	4	4	0.1756	0.005		*	*	*	*	*	*	*	*		34.1297	40.6826	3.41297	4.06826	4	4	0.1756	0.005
Hartwig et al. 2002	61	350	600	250	4	47°27'N	8°41'E	Switzerland	FACE	g N m-2 land	Low Nitrogen	Table 1 * Table 2; APNP+BPNP	DM*N concentration	Yes	Grassland	Lolium perenne	11.8354	12.2426	1.18354	1.22426	3	3	0.0338	0.0067		*	*	*	*	*	*	*	*		11.8354	12.2426	1.18354	1.22426	3	3	0.0338	0.0067
Hartwig et al. 2002	62	350	600	250	4	47°27'N	8°41'E	Switzerland	FACE	g N m-2 land	Low Nitrogen	Table 1 * Table 2; APNP+BPNP	DM*N concentration	Yes	Grassland	Trifolium repens	27.9098	39.0774	2.79098	3.90774	3	3	0.3366	0.0067		*	*	*	*	*	*	*	*		27.9098	39.0774	2.79098	3.90774	3	3	0.3366	0.0067
Hartwig et al. 2002	63	350	600	250	4	47°27'N	8°41'E	Switzerland	FACE	g N m-2 land	High Nitrogen	Table 1 * Table 2; APNP+BPNP	DM*N concentration	Yes	Grassland	Lolium perenne	35.6583	34.6815	3.56583	3.46815	3	3	-0.0278	0.0067		*	*	*	*	*	*	*	*		35.6583	34.6815	3.56583	3.46815	3	3	-0.0278	0.0067
Hartwig et al. 2002	64	350	600	250	4	47°27'N	8°41'E	Switzerland	FACE	g N m-2 land	High Nitrogen	Table 1 * Table 2; APNP+BPNP	DM*N concentration	Yes	Grassland	Trifolium repens	24.6938	39.4216	2.46938	3.94216	3	3	0.4678	0.0067		*	*	*	*	*	*	*	*		24.6938	39.4216	2.46938	3.94216	3	3	0.4678	0.0067
Hibbs et al. 1995	65	350	700	350	0.40274	*	*	USA	GC	mg	No	Table 2	*	No	Forest	Deciduous	1.47	2.24	0.147	0.224	16	16	0.4212	0.0012		1.47	2.24	0.147	0.224	16	16	0.4212	0.0012		*	*	*	*	*	*	*	*
Hibbs et al. 1995	66	350	700	350	0.40274	*	*	USA	GC	mg	Drought	Table 2	*	No	Forest	Deciduous	1.94	2.35	0.194	0.235	16	16	0.1917	0.0013		1.94	2.35	0.194	0.235	16	16	0.1917	0.0013		*	*	*	*	*	*	*	*
Hungate et al. 1996	67	360	710	350	0.416667	37°24' N	122°13' W	USA	OTC	g N m-2 land	No	Fig. 1	*	No	Grassland	Avena fatua	0.778689	0.991803	0.272472	0.37785	5	5	0.2419	0.0535		0.778689	0.991803	0.272472	0.37785	5	5	0.2419	0.0535		*	*	*	*	*	*	*	*
Hungate et al. 1996	68	360	710	350	0.416667	37°24' N	122°13' W	USA	OTC	g N m-2 land	No	Fig. 1	*	No	Grassland	Bromus hordeaceus	0.393443	0.442623	0.0916421	0.0819672	5	5	0.1178	0.0177		0.393443	0.442623	0.0916421	0.0819672	5	5	0.1178	0.0177		*	*	*	*	*	*	*	*
Hungate et al. 1996	69	360	710	350	0.416667	37°24' N	122°13' W	USA	OTC	g N m-2 land	No	Fig. 1	*	No	Grassland	Lolium multiflorum	0.5	0.434426	0.115919	0.133433	5	5	-0.1406	0.0296		0.5	0.434426	0.115919	0.133433	5	5	-0.1406	0.0296		*	*	*	*	*	*	*	*
Hungate et al. 1996	70	360	710	350	0.416667	37°24' N	122°13' W	USA	OTC	g N m-2 land	No	Fig. 1	*	No	Grassland	Vulpia michrostachys	0.590164	0.327869	0.244532	0.133433	5	5	-0.5878	0.0674		0.590164	0.327869	0.244532	0.133433	5	5	-0.5878	0.0674		*	*	*	*	*	*	*	*
Hungate et al. 1996	71	360	710	350	0.416667	37°24' N	122°13' W	USA	OTC	g N m-2 land	No	Fig. 1	*	No	Grassland	Lasthenia californica	0.45082	0.459016	0.122951	0.133433	5	5	0.018	0.0318		0.45082	0.459016	0.122951	0.133433	5	5	0.018	0.0318		*	*	*	*	*	*	*	*
Hungate et al. 1996	72	360	710	350	0.416667	37°24' N	122°13' W	USA	OTC	g N m-2 land	No	Fig. 1	*	No	Grassland	Plantago erecta	0.885246	0.745902	0.202444	0.133433	5	5	-0.1712	0.0169		0.885246	0.745902	0.202444	0.133433	5	5	-0.1712	0.0169		*	*	*	*	*	*	*	*
Hungate et al. 1996	73	360	710	350	0.416667	37°24' N	122°13' W	USA	OTC	g N m-2 land	Fertilizer	Fig. 1	*	Yes	Grassland	Avena fatua	7.29508	8.77049	2.02444	1.80514	5	5	0.1842	0.0239		7.29508	8.77049	2.02444	1.80514	5	5	0.1842	0.0239		*	*	*	*	*	*	*	*
Hungate et al. 1996	74	360	710	350	0.416667	37°24' N	122°13' W	USA	OTC	g N m-2 land	Fertilizer	Fig. 1	*	Yes	Grassland	Bromus hordeaceus	2.86885	5.16393	0.916421	1.73879	5	5	0.5878	0.0431		2.86885	5.16393	0.916421	1.73879	5	5	0.5878	0.0431		*	*	*	*	*	*	*	*
Hungate et al. 1996	75	360	710	350	0.416667	37°24' N	122°13' W	USA	OTC	g N m-2 land	Fertilizer	Fig. 1	*	Yes	Grassland	Lolium multiflorum	4.34426	4.67213	0.777609	1.39585	5	5	0.0727	0.0243		4.34426	4.67213	0.777609	1.39585	5	5	0.0727	0.0243		*	*	*	*	*	*	*	*
Hungate et al. 1996	76	360	710	350	0.416667	37°24' N	122°13' W	USA	OTC	g N m-2 land	Fertilizer	Fig. 1	*	Yes	Grassland	Vulpia michrostachys	3.44262	3.11475	0.916421	1.6898	5	5	-0.1001	0.073		3.44262	3.11475	0.916421	1.6898	5	5	-0.1001	0.073		*	*	*	*	*	*	*	*
Hungate et al. 1996	77	360	710	350	0.416667	37°24' N	122°13' W	USA	OTC	g N m-2 land	Fertilizer	Fig. 1	*	Yes	Grassland	Lasthenia californica	6.22951	6.31148	1.63934	1.86914	5	5	0.0131	0.0314		6.22951	6.31148	1.63934	1.86914	5	5	0.0131	0.0314		*	*	*	*	*	*	*	*
Hungate et al. 1996	78	360	710	350	0.416667	37°24' N	122°13' W	USA	OTC	g N m-2 land	Fertilizer	Fig. 1	*	Yes	Grassland	Plantago erecta	7.78689	5.98361	1.86914	1.5114	5	5	-0.2634	0.0243		7.78689	5.98361	1.86914	1.5114	5	5	-0.2634	0.0243		*	*	*	*	*	*	*	*
Jin et al. 2012	79	350	550	200	0.172603	36°42' S	142°11' W	Australia	FACE	mg plant-1	No	Table 2	0 mg P kg-1 soil	No	Cropland	Chickpea	13.7	13.9	1.37	1.39	4	4	0.0145	0.005		13.7	13.9	1.37	1.39	4	4	0.0145	0.005		*	*	*	*	*	*	*	*
Jin et al. 2012	80	350	550	200	0.172603	36°42' S	142°11' W	Australia	FACE	mg plant-1	Phosphorus	Table 2	2 mg P kg-1 soil	No	Cropland	Chickpea	20.7	26.6	2.07	2.66	4	4	0.2508	0.005		20.7	26.6	2.07	2.66	4	4	0.2508	0.005		*	*	*	*	*	*	*	*
Jin et al. 2012	81	350	550	200	0.172603	36°42' S	142°11' W	Australia	FACE	mg plant-1	Phosphorus	Table 2	4 mg P kg-1 soil	No	Cropland	Chickpea	28.6	36	2.86	3.6	4	4	0.2301	0.005		28.6	36	2.86	3.6	4	4	0.2301	0.005		*	*	*	*	*	*	*	*
Jin et al. 2012	82	350	550	200	0.172603	36°42' S	142°11' W	Australia	FACE	mg plant-1	Phosphorus	Table 2	8 mg P kg-1 soil	No	Cropland	Chickpea	37.3	56.7	3.73	5.67	4	4	0.4188	0.005		37.3	56.7	3.73	5.67	4	4	0.4188	0.005		*	*	*	*	*	*	*	*
Jin et al. 2012	83	350	550	200	0.172603	36°42' S	142°11' W	Australia	FACE	mg plant-1	Phosphorus	Table 2	16 mg P kg-1 soil	No	Cropland	Chickpea	54.5	74.1	5.45	7.41	4	4	0.3072	0.005		54.5	74.1	5.45	7.41	4	4	0.3072	0.005		*	*	*	*	*	*	*	*
Jin et al. 2012	84	350	550	200	0.172603	36°42' S	142°11' W	Australia	FACE	mg plant-1	No	Table 2	0 mg P kg-1 soil	No	Cropland	Field pea	16.9	19.5	1.69	1.95	4	4	0.1431	0.005		16.9	19.5	1.69	1.95	4	4	0.1431	0.005		*	*	*	*	*	*	*	*
Jin et al. 2012	85	350	550	200	0.172603	36°42' S	142°11' W	Australia	FACE	mg plant-1	Phosphorus	Table 2	2 mg P kg-1 soil	No	Cropland	Field pea	33.3	36.4	3.33	3.64	4	4	0.089	0.005		33.3	36.4	3.33	3.64	4	4	0.089	0.005		*	*	*	*	*	*	*	*
Jin et al. 2012	86	350	550	200	0.172603	36°42' S	142°11' W	Australia	FACE	mg plant-1	Phosphorus	Table 2	4 mg P kg-1 soil	No	Cropland	Field pea	36.8	36.9	3.68	3.69	4	4	0.0027	0.005		36.8	36.9	3.68	3.69	4	4	0.0027	0.005		*	*	*	*	*	*	*	*
Jin et al. 2012	87	350	550	200	0.172603	36°42' S	142°11' W	Australia	FACE	mg plant-1	Phosphorus	Table 2	8 mg P kg-1 soil	No	Cropland	Field pea	55	59.7	5.5	5.97	4	4	0.082	0.005		55	59.7	5.5	5.97	4	4	0.082	0.005		*	*	*	*	*	*	*	*
Jin et al. 2012	88	350	550	200	0.172603	36°42' S	142°11' W	Australia	FACE	mg plant-1	Phosphorus	Table 2	16 mg P kg-1 soil	No	Cropland	Field pea	59.3	69.8	5.93	6.98	4	4	0.163	0.005		59.3	69.8	5.93	6.98	4	4	0.163	0.005		*	*	*	*	*	*	*	*
Johnson et al. 2006	89	350	612.5	262.5	6	38°44' N	120°45' W	USA	OTC	kg N ha-2 land	No	Fig. 1	*	No	Forest	Evergreen	119.031	144.219	9.87495	29.0332	3	3	0.192	0.0158		22.5309	27.4194	4.69455	12.2058	3	3	0.1964	0.0805		312.03	377.82	32.5573	96.7999	3	3	0.1913	0.0255
Johnson et al. 2006	90	350	700	350	6	38°44' N	120°45' W	USA	OTC	kg N ha-2 land	Low Nitrogen	Fig. 1	*	Yes	Forest	Evergreen	135.703	145.058	15.4711	33.97	3	3	0.0667	0.0226		26.8633	37.1364	5.63396	4.69481	3	3	0.3238	0.02		353.383	360.902	52.0918	117.206	3	3	0.0211	0.0424
Johnson et al. 2006	91	350	612.5	262.5	6	38°44' N	120°45' W	USA	OTC	kg N ha-2 land	High Nitrogen	Fig. 1	*	Yes	Forest	Evergreen	162.286	151.184	14.7504	19.0506	3	3	-0.0709	0.008		34.7821	46.3256	10.328	24.1394	3	3	0.2866	0.1199		417.293	360.902	45.5803	37.9681	3	3	-0.1452	0.0077
Johnson et al. 2004	92	*	542	*	2	35°54' N	84°20' W	USA	FACE	kg N ha-1 land	No	Table 2	*	No	Forest	*	278	288	27.8	28.8	3	2	0.0353	0.0083		278	288	27.8	28.8	3	2	0.0353	0.0083		*	*	*	*	*	*	*	*
Johnson et al. 2003	93	350	686	336	5	28°38' N	80°42' W	USA	OTC	kg N ha-2 land	No	Table 2	*	No	Forest	Quercus myrtifolia	25.5	35.8	14.425	18.1019	8	8	0.3393	0.072		*	*	*	*	*	*	*	*		25.5	35.8	14.425	18.1019	8	8	0.3393	0.072
Johnson et al. 2003	94	350	686	336	5	28°38' N	80°42' W	USA	OTC	kg N ha-2 land	No	Table 2	*	No	Forest	Quercus geminata	20.9	16.8	11.5966	14.1421	8	8	-0.2184	0.1271		*	*	*	*	*	*	*	*		20.9	16.8	11.5966	14.1421	8	8	-0.2184	0.1271
Kim et al. 2011	95	380	622	242	0.30137	35°10' N	126°53' E	South_Korea	GC	mg N pot-2	Fertilizer	Table 4	*	Yes	Cropland	Rice	597	600.3	59.7	60.03	6	6	0.0055	0.0033		597	600.3	59.7	60.03	6	6	0.0055	0.0033		*	*	*	*	*	*	*	*
Kim et al. 2011	96	380	622	242	0.30137	35°10' N	126°53' E	South_Korea	GC	mg N pot-2	Fertilizer + Temperature	Table 4	*	Yes	Cropland	Rice	616.9	664.6	61.69	66.46	6	6	0.0745	0.0033		616.9	664.6	61.69	66.46	6	6	0.0745	0.0033		*	*	*	*	*	*	*	*
Lam et al. 2012 (NCA)	97	390	550	160	0.333333	36°42' S	142°07' E	Australia	FACE	kg ha-1	Nitrogen	Fig. 3	*	Yes	Cropland	Wheat	122.279	152.921	13.5985	12.3577	4	4	0.2236	0.0047		122.279	152.921	13.5985	12.3577	4	4	0.2236	0.0047		*	*	*	*	*	*	*	*
Lam et al. 2012 (NCA)	98	390	550	160	0.333333	36°42' S	142°07' E	Australia	FACE	kg ha-1	Nitrogen + Irrigation	Fig. 3	*	Yes	Cropland	Wheat	171.392	180.842	16.608	24.7464	4	4	0.0537	0.007		171.392	180.842	16.608	24.7464	4	4	0.0537	0.007		*	*	*	*	*	*	*	*
Lam et al. 2012 (AEE)	99	415	550	135	0.666667	40°10' N	116°14' E	China	FACE	kg ha-1	Low Nitrogen	Talbe 2; dc65	25 kg N ha-1 yr-1	Yes	Cropland	Wheat	118.1	202.3	11.81	20.23	3	3	0.5382	0.0067		118.1	202.3	11.81	20.23	3	3	0.5382	0.0067		*	*	*	*	*	*	*	*
Lam et al. 2012 (AEE)	100	415	550	135	0.666667	40°10' N	116°14' E	China	FACE	kg ha-1	Low Nitrogen	Talbe 2; dc90	25 kg N ha-1 yr-1	Yes	Cropland	Wheat	185.3	191.3	18.53	19.13	3	3	0.0319	0.0067		185.3	191.3	18.53	19.13	3	3	0.0319	0.0067		*	*	*	*	*	*	*	*
Lam et al. 2012 (AEE)	101	415	550	135	0.666667	40°10' N	116°14' E	China	FACE	kg ha-1	High Nitrogen	Talbe 2; dc65	95 kg N ha-1 yr-1	Yes	Cropland	Wheat	144.7	148.4	14.47	14.84	3	3	0.0252	0.0067		144.7	148.4	14.47	14.84	3	3	0.0252	0.0067		*	*	*	*	*	*	*	*
Lam et al. 2012 (AEE)	102	415	550	135	0.666667	40°10' N	116°14' E	China	FACE	kg ha-1	High Nitrogen	Talbe 2; dc90	95 kg N ha-1 yr-1	Yes	Cropland	Wheat	156.1	176	15.61	17.6	3	3	0.12	0.0067		156.1	176	15.61	17.6	3	3	0.12	0.0067		*	*	*	*	*	*	*	*
Lam et al. 2012 (BFS)	103	415	550	135	0.333333	40°10' N	116°14' E	China	FACE	kg ha-1	Fertilizer	Table 1; Zhonghua 13	4.8 kg N ha-1 yr-1	Yes	Cropland	Soybean	288.08	355.24	38.1377	27.7441	3	3	0.2096	0.0079		288.08	355.24	38.1377	27.7441	3	3	0.2096	0.0079		*	*	*	*	*	*	*	*
Lam et al. 2012 (BFS)	104	415	550	135	0.333333	40°10' N	116°14' E	China	FACE	kg ha-1	Fertilizer	Table 1; Zhonghua 35	4.8 kg N ha-1 yr-1	Yes	Cropland	Soybean	253.09	299.9	51.9635	27.7371	3	3	0.1697	0.0169		253.09	299.9	51.9635	27.7371	3	3	0.1697	0.0169		*	*	*	*	*	*	*	*
Lam et al. 2013 (PS)	105	390	700	310	0.666667	36°43' S	142°10' E	Australia	GC	mg pot-1	No	Table 1	0 g N	No	Cropland	Field pea	421.3	525.5	42.13	52.55	2	2	0.221	0.01		421.3	525.5	42.13	52.55	2	2	0.221	0.01		*	*	*	*	*	*	*	*
Lam et al. 2013 (PS)	106	390	700	310	0.666667	36°43' S	142°10' E	Australia	GC	mg pot-1	Nitrogen	Table 1	50 kg N ha-1	Yes	Cropland	Barley	146.8	151.6	14.68	15.16	2	2	0.0322	0.01		146.8	151.6	14.68	15.16	2	2	0.0322	0.01		*	*	*	*	*	*	*	*
Lam et al. 2013 (PS)	107	390	700	310	0.666667	36°43' S	142°10' E	Australia	GC	mg pot-1	No	Table 1	0 g N	No	Cropland	Barley	90.2	81.3	9.02	8.13	2	2	-0.1039	0.01		90.2	81.3	9.02	8.13	2	2	-0.1039	0.01		*	*	*	*	*	*	*	*
Lam et al. 2013 (PS_2)	108	390	700	310	0.416667	36°43' S	142°10' E	Australia	GC	mg pot-1	No	Table 4	cereal-legume soil	No	Cropland	Wheat	84.3	85.8	4.8	3.2	4	4	0.0176	0.0012		84.3	85.8	4.8	3.2	4	4	0.0176	0.0012		*	*	*	*	*	*	*	*
Lam et al. 2013 (PS_2)	109	390	700	310	0.416667	36°43' S	142°10' E	Australia	GC	mg pot-1	Residue	Table 4	cereal-legume soil	No	Cropland	Wheat	69.3	62.2	2.2	2.6	4	4	-0.1081	0.0007		69.3	62.2	2.2	2.6	4	4	-0.1081	0.0007		*	*	*	*	*	*	*	*
Lam et al. 2013 (PS_2)	110	390	700	310	0.416667	36°43' S	142°10' E	Australia	GC	mg pot-1	No	Table 4	cereal-fallow soil	No	Cropland	Wheat	73.2	77.4	3.2	2.4	4	4	0.0558	0.0007		73.2	77.4	3.2	2.4	4	4	0.0558	0.0007		*	*	*	*	*	*	*	*
Lam et al. 2013 (PS_2)	111	390	700	310	0.416667	36°43' S	142°10' E	Australia	GC	mg pot-1	Residue	Table 4	cereal-fallow soil	No	Cropland	Wheat	60.8	51	4.2	3.8	4	4	-0.1758	0.0026		60.8	51	4.2	3.8	4	4	-0.1758	0.0026		*	*	*	*	*	*	*	*
Larsen et al. 2011	112	350	510	160	2	55°53'N	11°58'E	Denmark	FACE	g N m-2	No	Table 2	Sum of APNP and BPNP	No	Heathland	*	28.47	26.74	10.7115	7.63832	6	6	-0.0627	0.0372		28.47	26.74	10.7115	7.63832	6	6	-0.0627	0.0372		*	*	*	*	*	*	*	*
Larsen et al. 2011	113	350	510	160	2	55°53'N	11°58'E	Denmark	FACE	g N m-2	Drought	Table 2	Sum of APNP and BPNP	No	Heathland	*	32.42	30.87	8.4131	9.75051	6	6	-0.049	0.0279		32.42	30.87	8.4131	9.75051	6	6	-0.049	0.0279		*	*	*	*	*	*	*	*
Larsen et al. 2011	114	350	510	160	2	55°53'N	11°58'E	Denmark	FACE	g N m-2	Warming	Table 2	Sum of APNP and BPNP	No	Heathland	*	28.61	24.67	8.21018	8.55447	6	6	-0.1482	0.0338		28.61	24.67	8.21018	8.55447	6	6	-0.1482	0.0338		*	*	*	*	*	*	*	*
Larsen et al. 2011	115	350	510	160	2	55°53'N	11°58'E	Denmark	FACE	g N m-2	Warming + Drought	Table 2	Sum of APNP and BPNP	No	Heathland	*	27.67	23.89	7.32852	8.78063	6	6	-0.1469	0.0342		27.67	23.89	7.32852	8.78063	6	6	-0.1469	0.0342		*	*	*	*	*	*	*	*
Lee et al. 2003	116	368	560	192	2	45° N	93° W	USA	FACE	g N m-2	Nitrogen + Biodiversity	Table3; Lupinus absent	*	Yes	Grassland	*	9.7	9.7	4.94773	4.94773	17	17	0	0.0306		9.7	9.7	4.94773	4.94773	17	17	0	0.0306		*	*	*	*	*	*	*	*
Lee et al. 2003	117	368	560	192	2	45° N	93° W	USA	FACE	g N m-2	Nitrogen + Biodiversity	Table3; Lupinus present	*	Yes	Grassland	*	12.6	11.9	4.53542	4.94773	17	17	-0.0572	0.0178		12.6	11.9	4.53542	4.94773	17	17	-0.0572	0.0178		*	*	*	*	*	*	*	*
Martin-Olmedo et al. 2002	118	396	716	320	0.0684932	*	*	*	GC	mg N pot-1	Low Nitrogen	Fig. 3	*	Yes	Cropland	Barley	13.99	24.58	6.55781	9.80034	17	17	0.5636	0.0223		13.99	24.58	6.55781	9.80034	17	17	0.5636	0.0223		*	*	*	*	*	*	*	*
Martin-Olmedo et al. 2002	119	396	716	320	0.0684932	*	*	*	GC	mg N pot-1	High Nitrogen	Fig. 3	*	Yes	Cropland	Barley	24.27	43.71	7.29032	6.39081	17	17	0.5883	0.0066		24.27	43.71	7.29032	6.39081	17	17	0.5883	0.0066		*	*	*	*	*	*	*	*
Mikan et al. 2000	120	367	715	348	2	45°34' N	84°40' W	USA	OTC	g N m-2	Nitrogen	Table 1 * Table 3	20 mg N; Low-N soil	Yes	Forest	P. tremuloides	4.1225	4.3594	0.823072	0.694662	8	8	0.0559	0.0082		4.1225	4.3594	0.823072	0.694662	8	8	0.0559	0.0082		*	*	*	*	*	*	*	*
Mikan et al. 2000	121	367	715	348	2	45°34' N	84°40' W	USA	OTC	g N m-2	Nitrogen	Table 1 * Table 3	20 mg N; High-N soil	Yes	Forest	P. tremuloides	12.9828	15.76	2.66523	2.67456	8	8	0.1938	0.0089		12.9828	15.76	2.66523	2.67456	8	8	0.1938	0.0089		*	*	*	*	*	*	*	*
Nam et al. 2013	122	383	649	266	0.312329	35°10'N	126°53'E	South_Korea	OTC	mg pot-1	Fertilizer	Table 4; 2007; Low N and P soil	5.5 g N m-2	Yes	Cropland	Rice	527.2	608.5	0	46.2	9	9	0.1434	0.0006		527.2	608.5	0	46.2	9	9	0.1434	0.0006		*	*	*	*	*	*	*	*
Nam et al. 2013	123	370	650	280	0.312329	35°10'N	126°53'E	South_Korea	OTC	mg pot-1	Fertilizer	Table 4; 2008; Higher N and P soil	5.5 g N m-2	Yes	Cropland	Rice	870.1	964.1	0	32.4	9	9	0.1026	0.0001		870.1	964.1	0	32.4	9	9	0.1026	0.0001		*	*	*	*	*	*	*	*
Nam et al. 2013	124	383	649	266	0.312329	35°10'N	126°53'E	South_Korea	OTC	mg pot-1	Fertilizer+warming	Table 4; 2007; Low N and P soil	5.5 g N m-2	Yes	Cropland	Rice	556.6	677.7	16.8	85.5	9	9	0.1969	0.0019		556.6	677.7	16.8	85.5	9	9	0.1969	0.0019		*	*	*	*	*	*	*	*
Nam et al. 2013	125	370	650	280	0.312329	35°10'N	126°53'E	South_Korea	OTC	mg pot-1	Fertilizer+warming	Table 4; 2008; Higher N and P soil	5.5 g N m-2	Yes	Cropland	Rice	937	1064	23.1	66.9	9	9	0.1271	0.0005		937	1064	23.1	66.9	9	9	0.1271	0.0005		*	*	*	*	*	*	*	*
Nguyen et al. 2006	126	*	800	*	0.0821918	*	*	*	GC	mg plant-1	Fertillizer	Table 5	0.3 g N; 10 mg P	Yes	Forest	Acacia auriculiformi	294	350	29.4	35	8	8	0.1744	0.0025		294	350	29.4	35	8	8	0.1744	0.0025		*	*	*	*	*	*	*	*
Nguyen et al. 2006	127	*	800	*	0.0821918	*	*	*	GC	mg plant-1	Fertillizer	Table 5	0.3 g N; 50 mg P	Yes	Forest	Acacia auriculiformi	301	331	30.1	33.1	8	8	0.095	0.0025		301	331	30.1	33.1	8	8	0.095	0.0025		*	*	*	*	*	*	*	*
Nguyen et al. 2006	128	*	800	*	0.0821918	*	*	*	GC	mg plant-1	Fertillizer	Table 5	0.3 g N; 100 mg P	Yes	Forest	Acacia auriculiformi	392	391	39.2	39.1	8	8	-0.0026	0.0025		392	391	39.2	39.1	8	8	-0.0026	0.0025		*	*	*	*	*	*	*	*
Nguyen et al. 2006	129	*	800	*	0.0821918	*	*	*	GC	mg plant-1	Fertillizer	Table 5	0.3 g N; 10 mg P	Yes	Forest	Acacia magium	337	437	33.7	43.7	8	8	0.2599	0.0025		337	437	33.7	43.7	8	8	0.2599	0.0025		*	*	*	*	*	*	*	*
Nguyen et al. 2006	130	*	800	*	0.0821918	*	*	*	GC	mg plant-1	Fertillizer	Table 5	0.3 g N; 50 mg P	Yes	Forest	Acacia magium	430	513	43	51.3	8	8	0.1765	0.0025		430	513	43	51.3	8	8	0.1765	0.0025		*	*	*	*	*	*	*	*
Nguyen et al. 2006	131	*	800	*	0.0821918	*	*	*	GC	mg plant-1	Fertillizer	Table 5	0.3 g N; 100 mg P	Yes	Forest	Acacia magium	475	469	47.5	46.9	8	8	-0.0127	0.0025		475	469	47.5	46.9	8	8	-0.0127	0.0025		*	*	*	*	*	*	*	*
Niboyet et al. 2010	132	318	645	327	0.208333	*	*	*	GC	g	No	Fig. 1c	*	No	Grassland	Dactylis glomerata	0.150538	0.145161	0.0279363	0	3	3	-0.0359	0.0115		0.150538	0.145161	0.0279363	0	3	3	-0.0359	0.0115		*	*	*	*	*	*	*	*
Niboyet et al. 2010	133	318	645	327	0.208333	*	*	*	GC	g	Nitrogen	Fig. 1c	10 g N m-2	Yes	Grassland	Dactylis glomerata	0.55914	0.607527	0.0465605	0.111745	3	3	0.083	0.0136		0.55914	0.607527	0.0465605	0.111745	3	3	0.083	0.0136		*	*	*	*	*	*	*	*
Niklaus et al. 1998	134	360	630	270	2	47°33' N	7°34' E	Switzerland	GC	kg N ha-1 land	No	Fig. 5	*	No	Grassland	*	6.87023	7.70992	0.778476	0.682769	8	8	0.1153	0.0026		6.87023	7.70992	0.778476	0.682769	8	8	0.1153	0.0026		*	*	*	*	*	*	*	*
Niklaus et al. 1998	135	360	630	270	2	47°33' N	7°34' E	Switzerland	GC	kg N ha-1 land	Phosphorus	Fig. 5	*	No	Grassland	*	6.79389	8.01527	1.57185	1.74073	8	8	0.1653	0.0126		6.79389	8.01527	1.57185	1.74073	8	8	0.1653	0.0126		*	*	*	*	*	*	*	*
Niklaus et al. 1998	136	360	630	270	2	47°33' N	7°34' E	Switzerland	GC	kg N ha-1 land	Legume	Fig. 5	*	No	Grassland	*	12.0611	13.5878	1.85733	4.19222	8	8	0.1192	0.0149		12.0611	13.5878	1.85733	4.19222	8	8	0.1192	0.0149		*	*	*	*	*	*	*	*
Niklaus et al. 1998	137	360	630	270	2	47°33' N	7°34' E	Switzerland	GC	kg N ha-1 land	Phosphorus & legume	Fig. 5	*	No	Grassland	*	14.3511	17.2519	3.11391	2.1374	8	8	0.1841	0.0078		14.3511	17.2519	3.11391	2.1374	8	8	0.1841	0.0078		*	*	*	*	*	*	*	*
Niklaus et al. 2003	138	360	600	240	6	47°33' N	7°34' E	Switzerland	OTC	g N m-2 land	No	Fig. 7 (ANP + BNP)	*	No	Grassland	*	16.8	18.6	3.68782	1.89737	8	8	0.1018	0.0073		16.8	18.6	3.68782	1.89737	8	8	0.1018	0.0073		*	*	*	*	*	*	*	*
Norby 1987	139	350	700	350	0.230137	*	*	USA	GC	mg plant-1	No	Table 2	*	No	Forest	E. angustifolia	33	37	3.3	3.7	10	10	0.1144	0.002		33	37	3.3	3.7	10	10	0.1144	0.002		*	*	*	*	*	*	*	*
Norby 1987	140	350	700	350	0.268493	*	*	USA	GC	mg plant-1	No	Table 2	*	No	Forest	A. glutinosa	34	36	3.4	3.6	10	10	0.0572	0.002		34	36	3.4	3.6	10	10	0.0572	0.002		*	*	*	*	*	*	*	*
Norby 1987	141	350	700	350	0.287671	*	*	USA	GC	mg plant-1	No	Table 2	*	No	Forest	R. pseudoacacia	145	160	14.5	16	10	10	0.0984	0.002		145	160	14.5	16	10	10	0.0984	0.002		*	*	*	*	*	*	*	*
Norby & Iversen 2006	142	319	544	225	6	35°54'N	84°20' W	USA	FACE	kg N ha-1 land	No	Fig. 6	*	No	Forest	Sweetgum	96.5116	124.806	8.28961	7.52184	3	2	0.2571	0.0043		93.0233	113.953	10.9492	6.10388	3	2	0.2029	0.0061		100	135.659	13.1212	14.5494	3	2	0.305	0.0115
Oikawa et al. 2010	143	384.7	593	208.3	0.333333	39°44' N	141°7' E	Japan	GC	g plant-1	Fertillizer (nodulated)	ANP + BNP	sd; 0.3 g N	Yes	Cropland	Soybean	0.22309	0.263842	0.015857	0.00830469	5	5	0.1676	0.0012		0.22309	0.263842	0.015857	0.00830469	5	5	0.1676	0.0012		*	*	*	*	*	*	*	*
Oikawa et al. 2010	144	384.7	593	208.3	0.333333	39°44' N	141°7' E	Japan	GC	g plant-1	Fertillizer (non-nodulated)	ANP + BNP	sd; 0.3 g N	Yes	Cropland	Soybean	0.125674	0.130941	0.00846569	0.0103279	5	5	0.0405	0.0022		0.125674	0.130941	0.00846569	0.0103279	5	5	0.0405	0.0022		*	*	*	*	*	*	*	*
Pang et al. 2006	145	*	*	200	0.333333	31°37' N	120°28' E	China	FACE	mg pot-1	Low Nitrogen	Table 2	14 mg N L-1	Yes	Cropland	Rice	388.3	416.2	8.31384	1.55885	3	3	0.0694	0.0002		388.3	416.2	8.31384	1.55885	3	3	0.0694	0.0002		*	*	*	*	*	*	*	*
Pang et al. 2006	146	*	*	200	0.333333	31°37' N	120°28' E	China	FACE	mg pot-1	High Nitrogen	Table 2	28 mg N L-1	Yes	Cropland	Rice	771	806.2	3.81051	10.7387	3	3	0.0446	0.0001		771	806.2	3.81051	10.7387	3	3	0.0446	0.0001		*	*	*	*	*	*	*	*
Perez-Lopez et al. 2013	147	350	700	350	0.0767123	*	*	Canada	GC	mg plant-1	Fertilizer	Fig. 5a + b + c	10.5 g N day-1 m-3	Yes	Cropland	Barley	43.7222	48.3954	2.2755	1.88146	6	6	0.1015	0.0007		43.7222	48.3954	2.2755	1.88146	6	6	0.1015	0.0007		*	*	*	*	*	*	*	*
Perez-Lopez et al. 2013	148	350	700	350	0.0767123	*	*	Canada	GC	mg plant-1	Fertilizer	Fig. 5a + b + c	10.5 g N day-1 m-3	Yes	Cropland	Barley	34.2342	42.3695	1.691	1.10968	6	6	0.2132	0.0005		34.2342	42.3695	1.691	1.10968	6	6	0.2132	0.0005		*	*	*	*	*	*	*	*
Perez-Lopez et al. 2013	149	350	700	350	0.0767123	*	*	Canada	GC	mg plant-1	Fertilizer	Fig. 5a + b + c	10.5 g N day-1 m-3	Yes	Cropland	Barley	26.3956	32.573	1.38568	1.22418	6	6	0.2103	0.0007		26.3956	32.573	1.38568	1.22418	6	6	0.2103	0.0007		*	*	*	*	*	*	*	*
Perez-Lopez et al. 2013	150	350	700	350	0.0767123	*	*	Canada	GC	mg plant-1	Fertilizer	Fig. 5a + b + c	10.5 g N day-1 m-3	Yes	Cropland	Barley	20.5139	27.7483	0.90453	1.10744	6	6	0.3021	0.0006		20.5139	27.7483	0.90453	1.10744	6	6	0.3021	0.0006		*	*	*	*	*	*	*	*
Polley et al. 1997	151	385	690	305	1.08333	*	*	*	GC	g container-1	No	Fig. 4	385 ppm vs. 690 ppm	No	Forest	A. smallii	27.6442	41.3462	2.76442	4.13462	3	3	0.4026	0.0067		27.6442	41.3462	2.76442	4.13462	3	3	0.4026	0.0067		*	*	*	*	*	*	*	*
Polley et al. 1997	152	385	980	595	1.08333	*	*	*	GC	g container-1	No	Fig. 4	385 ppm vs. 980 ppm	No	Forest	A. smallii	27.6442	50	2.76442	5	3	3	0.5926	0.0067		27.6442	50	2.76442	5	3	3	0.5926	0.0067		*	*	*	*	*	*	*	*
Pregitzer et al. 1995	153	245	693	448	0.432877	45°34' N	84°40' W	USA	OTC	g N chamber-1	No	Table 1 * Table 2	Low-N soil	No	Forest	Populus x euramericana	5.18868	5.39136	0.8946	0.89856	5	5	0.0383	0.0115		5.18868	5.39136	0.8946	0.89856	5	5	0.0383	0.0115		*	*	*	*	*	*	*	*
Pregitzer et al. 1995	154	245	693	448	0.432877	45°34' N	84°40' W	USA	OTC	g N chamber-1	No	Table 1 * Table 2	High-N soil	No	Forest	Populus x euramericana	11.5243	16.6589	0.53424	0.67536	5	5	0.3685	0.0008		11.5243	16.6589	0.53424	0.67536	5	5	0.3685	0.0008		*	*	*	*	*	*	*	*
Reich & Hobbie 2013	155	368	560	192	13	45° N	93° W	USA	FACE	g N m-2	Biodiversity	Fig. S1c	*	No	Grassland	*	8.2536	9.09067	0.200837	0.299773	3	3	0.0966	0.0006		8.33045	8.82229	0.248307	0.403294	3	3	0.0574	0.001		8.23055	9.17118	0.252204	0.373655	3	3	0.1082	0.0009
Reich & Hobbie 2013	156	368	560	192	13	45° N	93° W	USA	FACE	g N m-2	Biodiversity + Nitrogen	Fig. S1c	*	Yes	Grassland	*	10.7116	11.7792	0.26624	0.297221	3	3	0.095	0.0004		10.6359	10.5744	0.447642	0.522687	3	3	-0.0058	0.0014		10.7343	12.1406	0.322744	0.357594	3	3	0.1231	0.0006
Roy et al. 2012	157	390	550	160	0.25	20°25'N	85°55'E	India	OTC	g N m-2	Fertillizer + warming	Table 2 (ANP + BNP)	100 kg N ha-1	Yes	Cropland	Rice	6.666	8.398	0.6666	0.8398	5	5	0.231	0.004		6.666	8.398	0.6666	0.8398	5	5	0.231	0.004		*	*	*	*	*	*	*	*
Runion et al. 1999	158	372.3	739.5	367.2	1.66667	*	*	*	OTC	g	No	Table 1 (Biomass)* Table 3 (nitrogen)	Water stress 1	No	Forest	Pine	6.84863	7.30485	0.684863	0.730485	5	5	0.0645	0.004		6.84863	7.30485	0.684863	0.730485	5	5	0.0645	0.004		*	*	*	*	*	*	*	*
Runion et al. 1999	159	372.3	739.5	367.2	1.66667	*	*	*	OTC	g	No	Table 1 (Biomass)* Table 3 (nitrogen)	Water stress 2	No	Forest	Pine	1.66405	2.41696	0.166405	0.241696	5	5	0.3732	0.004		1.66405	2.41696	0.166405	0.241696	5	5	0.3732	0.004		*	*	*	*	*	*	*	*
Schortemeyer et al. 2002	160	350	700	350	0.405479	*	*	Australian	GC	mmol	No	Table 5 (Final total N content)	*	No	Grassland	A. aneura	0.37	0.54	0.12	0.15	9	9	0.3781	0.0203		0.37	0.54	0.12	0.15	9	9	0.3781	0.0203		*	*	*	*	*	*	*	*
Schortemeyer et al. 2002	161	350	700	350	0.405479	*	*	Australian	GC	mmol	No	Table 5 (Final total N content)	*	No	Grassland	A. tetragonophylla	2.1	2.9	0.6	2.4	9	9	0.3228	0.0852		2.1	2.9	0.6	2.4	9	9	0.3228	0.0852		*	*	*	*	*	*	*	*
Schortemeyer et al. 2002	162	350	700	350	0.405479	*	*	Australian	GC	mmol	No	Table 5 (Final total N content)	*	No	Grassland	A. irrorata	4.6	6.3	2.7	5.4	9	9	0.3145	0.1199		4.6	6.3	2.7	5.4	9	9	0.3145	0.1199		*	*	*	*	*	*	*	*
Schortemeyer et al. 2002	163	350	700	350	0.405479	*	*	Australian	GC	mmol	No	Table 5 (Final total N content)	*	No	Grassland	A. dealbata	22.3	43.4	11.1	15.9	9	9	0.6659	0.0424		22.3	43.4	11.1	15.9	9	9	0.6659	0.0424		*	*	*	*	*	*	*	*
Schortemeyer et al. 2002	164	350	700	350	0.405479	*	*	Australian	GC	mmol	No	Table 5 (Final total N content)	*	No	Grassland	A. mearnsii	19.7	20.5	12.3	13.8	9	9	0.0398	0.0937		19.7	20.5	12.3	13.8	9	9	0.0398	0.0937		*	*	*	*	*	*	*	*
Schortemeyer et al. 2002	165	350	700	350	0.405479	*	*	Australian	GC	mmol	No	Table 5 (Final total N content)	*	No	Grassland	A. implexa	10.5	20.2	10.2	19.2	9	9	0.6543	0.2052		10.5	20.2	10.2	19.2	9	9	0.6543	0.2052		*	*	*	*	*	*	*	*
Schortemeyer et al. 2002	166	350	700	350	0.405479	*	*	Australian	GC	mmol	No	Table 5 (Final total N content)	*	No	Grassland	A. melanoxylon	11.6	28.3	6	10.2	9	9	0.8919	0.0442		11.6	28.3	6	10.2	9	9	0.8919	0.0442		*	*	*	*	*	*	*	*
Shervin et al. 2013	167	400	640	240	0.219178	*	*	Australia	GC	mg plant-1	No	Fig. 5a	*	No	Forest	Blue gum	71.0227	129.545	31.4918	54.1266	3	3	0.601	0.1237		71.0227	129.545	31.4918	54.1266	3	3	0.601	0.1237		*	*	*	*	*	*	*	*
Shervin et al. 2013	168	400	640	240	0.219178	*	*	Australia	GC	mg plant-1	Warming	Fig. 5a	*	No	Forest	Blue gum	86.9318	185.795	16.73	30.5077	3	3	0.7595	0.0213		86.9318	185.795	16.73	30.5077	3	3	0.7595	0.0213		*	*	*	*	*	*	*	*
Shimono et al. 2012	169	380	580	200	0.25	39°42'N	141°08'E	Japan	OTC	mg plant-1	Fertillizer	Table 2 ((top+root weight)*N concentration)	0.78 kg N m-3; Morioka	Yes	Cropland	Soybean	228.389	297.055	3.21902	20.4955	3	3	0.2629	0.0017		228.389	297.055	3.21902	20.4955	3	3	0.2629	0.0017		*	*	*	*	*	*	*	*
Shimono et al. 2012	170	380	580	200	0.25	39°42'N	141°08'E	Japan	OTC	mg plant-1	Fertillizer + Waterlogging	Table 2 ((top+root weight)*N concentration)	0.78 kg N m-3; Morioka	Yes	Cropland	Soybean	86.089	104.168	2.66147	4.70148	3	3	0.1906	0.001		86.089	104.168	2.66147	4.70148	3	3	0.1906	0.001		*	*	*	*	*	*	*	*
Smart et al. 1997	171	360	1000	640	0.0630137	*	*	*	GC	g m-2	Nitrogen (100 mM)	Table 1 (N assimilated)	Low N	Yes	Cropland	Wheat	32.98	36.18	3.08305	6.5	3	4	0.0926	0.011		32.98	36.18	3.08305	6.5	3	4	0.0926	0.011		*	*	*	*	*	*	*	*
Smart et al. 1997	172	360	1000	640	0.0630137	*	*	*	GC	g m-2	Nitrogen (1000 mM)	Table 1 (N assimilated)	High N	Yes	Cropland	Wheat	33.19	38.21	2.8752	7.38	3	4	0.1408	0.0118		33.19	38.21	2.8752	7.38	3	4	0.1408	0.0118		*	*	*	*	*	*	*	*
Soussana et al. 1996	173	350	700	350	2	*	*	France	GC	kg N ha-1	Low Nitrogen	Table 1A + Table 3	N- (160 kg N fertilizer ha -1 y-1)	Yes	Grassland	Ryegrass	145	190	10.9805	21.9219	4	4	0.2703	0.0048		145	190	10.9805	21.9219	4	4	0.2703	0.0048		*	*	*	*	*	*	*	*
Soussana et al. 1996	174	350	700	350	2	*	*	France	GC	kg N ha-1	High Nitrogen	Table 1A + Table 3	N+ (530 kg N fertilizer ha -1 y-1)	Yes	Grassland	Ryegrass	145	197	26.6029	43.4117	4	4	0.3065	0.0206		145	197	26.6029	43.4117	4	4	0.3065	0.0206		*	*	*	*	*	*	*	*
Soussana et al. 1996	175	350	700	350	2	*	*	France	GC	kg N ha-1	Low Nitrogen + warming	Table 1A + Table 3	N- (160 kg N fertilizer ha -1 y-1)	Yes	Grassland	Ryegrass	145	185	10.9805	20.3048	4	4	0.2436	0.0044		145	185	10.9805	20.3048	4	4	0.2436	0.0044		*	*	*	*	*	*	*	*
Soussana et al. 1996	176	350	700	350	2	*	*	France	GC	kg N ha-1	High Nitrogen + warming	Table 1A + Table 3	N+ (530 kg N fertilizer ha -1 y-1)	Yes	Grassland	Ryegrass	83	104	26.6029	24.8021	4	4	0.2256	0.0399		83	104	26.6029	24.8021	4	4	0.2256	0.0399		*	*	*	*	*	*	*	*
Thomas et al. 2000	177	350	700	350	0.273973	9°51‘ N	84°14’W	Costa Rica	GC	mg plant-1	No	Table 2(N content)	*	No	Forest	Gliricidia sepium	895.6	996.2	131.928	49.6407	5	5	0.1065	0.0048		895.6	996.2	131.928	49.6407	5	5	0.1065	0.0048		*	*	*	*	*	*	*	*
Thomas et al. 2000	178	350	700	350	0.273973	9°51‘ N	84°14’W	Costa Rica	GC	mg plant-1	Low Nitrogen	Table 2(N content)	NH4NO3 (1 Mm)	Yes	Forest	Gliricidia sepium	921.3	1087	126.114	612.012	5	5	0.1654	0.0671		921.3	1087	126.114	612.012	5	5	0.1654	0.0671		*	*	*	*	*	*	*	*
Thomas et al. 2000	179	350	700	350	0.273973	9°51‘ N	84°14’W	Costa Rica	GC	mg plant-1	High Nitrogen	Table 2(N content)	NH4NO3 (10 Mm)	Yes	Forest	Gliricidia sepium	940.7	1559.3	172.401	399.362	5	5	0.5054	0.0198		940.7	1559.3	172.401	399.362	5	5	0.5054	0.0198		*	*	*	*	*	*	*	*
Tingey et al. 2003	180	*	*	180	4	*	*	USA	OTC	g plant-1	Warming	Fig. 3a (total), only AC and EC	*	No	Forest	P. menziesii	3.47961	3.28544	0.920478	0.607863	5	5	-0.0574	0.0208		*	*	*	*	*	*	*	*		3.47961	3.28544	0.920478	0.607863	5	5	-0.0574	0.0208
Torbet et al. 2004	181	357	750	393	3	32.6° N	85.5°W	USA	OTC	kg N ha-1	Nitrogen	Table 2 (Plant N)	101 kg N ha-1	Yes	Cropland	sorghum	76.4667	79.3333	7.64667	7.93333	3	3	0.0368	0.0067		76.4667	79.3333	7.64667	7.93333	3	3	0.0368	0.0067		*	*	*	*	*	*	*	*
Torbet et al. 2004	182	357	750	393	3	32.6° N	85.5°W	USA	OTC	kg N ha-1	Nitrogen	Table 3 (Plant N total)	34 kg N ha-1	Yes	Cropland	soybean	223.367	288.4	22.3367	28.84	3	3	0.2555	0.0067		223.367	288.4	22.3367	28.84	3	3	0.2555	0.0067		*	*	*	*	*	*	*	*
Verburg et al. 2004	183	365	700	335	0.213699	*	*	*	GC	mg plant-1	No	Fig. 3	unlabeled; sum of tissues	No	Forest	Pine	1969.66	1947.59	244.95	310.255	4	4	-0.0113	0.0102		1969.66	1947.59	244.95	310.255	4	4	-0.0113	0.0102		*	*	*	*	*	*	*	*
Verburg et al. 2004	184	365	700	335	0.213699	*	*	*	GC	mg plant-1	No	Fig. 3	labeled; sum of tissues	No	Forest	Pine	1487.82	1616.55	231.227	171.38	4	4	0.083	0.0088		1487.82	1616.55	231.227	171.38	4	4	0.083	0.0088		*	*	*	*	*	*	*	*
Vogel et al. 1997	185	349	695	346	0.438356	45°34' N	84°40' W	USA	OTC	g plant-1	No	Table 3	*	No	Forest	Black alder	1.068	1.5	0.105095	0.154289	5	5	0.3397	0.0041		1.068	1.5	0.105095	0.154289	5	5	0.3397	0.0041		*	*	*	*	*	*	*	*
Zak et al. 2007	186	374	531	157	7	45°40.5' N	89°37.5' W	USA	FACE	g N m-2 land	O3; average of contral and O3	Table 1	*	No	Forest	Across plant community type	13.6	19	4.76314	6.11414	3	3	0.3344	0.0754		*	*	*	*	*	*	*	*		13.6	19	4.76314	6.11414	3	3	0.3344	0.0754
Zak et al. 2000b	187	367	715	348	2.5	45°34' N	84°40' W	USA	OTC	g N chamber-1	Nitrogen	Table 3	20 mg N; Low-N soil	Yes	Forest	P. tremuloides	35.6	36	3.75659	9.43621	5	5	0.0112	0.016		35.6	36	3.75659	9.43621	5	5	0.0112	0.016		*	*	*	*	*	*	*	*
Zak et al. 2000b	188	367	715	348	2.5	45°34' N	84°40' W	USA	OTC	g N chamber-1	Nitrogen	Table 3	20 mg N; High-N soil	Yes	Forest	P. tremuloides	136.7	154.8	6.01502	9.27968	5	5	0.1243	0.0011		136.7	154.8	6.01502	9.27968	5	5	0.1243	0.0011		*	*	*	*	*	*	*	*
Zanetti et al. 1996	189	350	600	250	2	47°27'N	8°41'E	Switzerland	FACE	g N m-2	Low Nitrogen	ANP + BNP	17 g N m-2	Yes	Cropland	White clover	53.935	60.085	5.3935	6.0085	3	3	0.108	0.0067		53.935	60.085	5.3935	6.0085	3	3	0.108	0.0067		*	*	*	*	*	*	*	*
Zanetti et al. 1996	190	350	600	250	2	47°27'N	8°41'E	Switzerland	FACE	g N m-2	High Nitrogen	ANP + BNP	51.3 g N m-2	Yes	Cropland	White clover	54.8283	58.1767	5.48283	5.81767	3	3	0.0593	0.0067		54.8283	58.1767	5.48283	5.81767	3	3	0.0593	0.0067		*	*	*	*	*	*	*	*

## Sheet: LNP
																	Total									Short-term									Long-term
Reference	Obs	Ambient CO2 (ppm)	Elevated CO2 (ppm)	CO2 difference (ppm)	Treatment duration (years)	Latitude	Longitude	Country	Fercility	Unit	Other treatments	Data location	Notes	Nitrogen addition	Ecosystem	Vegetation	Mean_a	Mean_e	Std_a	Std_e	N_a	N_e	lnR	Var(lnR)		Mean_a	Mean_e	Std_a	Std_e	N_a	N_e	lnR	Var(lnR)		Mean_a	Mean_e	Std_a	Std_e	N_a	N_e	lnR	Var(lnR)
Calfapietra et al. 2007	1	370	550	180	3	42°37'N	11°51'E	Italy	FACE	g N m-2 land	No	Fig. 1	*	No	Forest	Sum of different species	54	47	2.44949	3	3	3	-0.1388	0.002		54	47	2.44949	3	3	3	-0.1388	0.002		*	*	*	*	*	*	*	*
Cheng et al. 2011	2	382	551	169	4	35°43' N	78°40' W	USA	OTC	g N m-2 land	Nitrogen	Fig. 1; Sum of soybean and wheat	*	Yes	Cropland	Sum of soybean and wheat	10.4091	12.5227	0.449058	0.459968	4	4	0.1849	0.0008		10.2424	12.4848	0.57234	0.514259	4	4	0.198	0.0012		10.9091	12.6364	0.655555	1.14992	4	4	0.147	0.003
Cheng et al. 2011	3	382	551	169	4	35°43' N	78°40' W	USA	OTC	g N m-2 land	Nitrogen + O3	Fig. 1; Sum of soybean and wheat	*	Yes	Cropland	Sum of soybean and wheat	9.61364	11.5227	0.379212	0.520648	4	4	0.1811	0.0009		9.75758	11.5152	0.455371	0.684705	4	4	0.1656	0.0014		9.18182	11.5455	0.771389	0.514259	4	4	0.2291	0.0023
Finzi et al. 2002	4	365	560	195	4	35°58' N	79°5' W	USA	FACE	g N m-2 land	No	Table 2	*	No	Forest	sum of pine and deciduous leaves and woody	3.5475	3.885	0.297673	0.293103	3	3	0.0909	0.0042		3.42667	3.72	0.353836	0.305859	3	3	0.0821	0.0058		3.91	4.38	0.668581	0.876014	3	3	0.1135	0.0231
Garten et al. 2011	5	391	544	153	11	35°54' N	84°24'W	USA	FACE	g N kg-1	No	Fig. 1b	*	No	Forest	Deciduous	8.31975	7.13802	0.142545	0.120383	3	2	-0.1532	0.0002		9.34507	8.29599	0.306763	0.298199	3	2	-0.1191	0.001		8.017	6.69763	0.163085	0.129544	3	2	-0.1798	0.0003
Hoosbeek & Scarascia-Mugnozza 2009	6	370	550	180	6	42°37'N	11°51'E	Italy	FACE	g N m-2 land	No	Fig. 2	*	No	Forest	Deciduous	106	147	15.5885	19.0526	3	3	0.327	0.0128		*	*	*	*	*	*	*	*		106	147	15.5885	19.0526	3	3	0.327	0.0128
Hungate et al. 2006	7	350	686	336	7	28°38' N	80°42' W	USA	OTC	g N m-2 land	No	Table 1	*	No	Forest	*	1.5915	1.90367	0.194798	0.272807	8	8	0.1791	0.0044		1.384	1.669	0.228337	0.319675	8	8	0.1872	0.008		1.799	2.13833	0.320854	0.449415	8	8	0.1728	0.0095
Johnson et al. 2004	8	*	542	*	2	35°54' N	84°20' W	USA	FACE	kg N ha-1 land	No	Table 2	*	No	Forest	*	40	43	4	4.3	3	2	0.0723	0.0083		40	43	4	4.3	3	2	0.0723	0.0083		*	*	*	*	*	*	*	*
Larsen et al. 2011	9	350	510	160	2	55°53'N	11°58'E	Denmark	FACE	g N m-2	No	Table 2	*	No	Heathland	*	0.095	0.053	0.120025	0.0440908	6	6	-0.5836	0.3813		0.095	0.053	0.120025	0.0440908	6	6	-0.5836	0.3813		*	*	*	*	*	*	*	*
Larsen et al. 2011	10	350	510	160	2	55°53'N	11°58'E	Denmark	FACE	g N m-2	Drought	Table 2	*	No	Heathland	*	0.018	0.061	0.00979796	0.0759342	6	6	1.2205	0.3074		0.018	0.061	0.00979796	0.0759342	6	6	1.2205	0.3074		*	*	*	*	*	*	*	*
Larsen et al. 2011	11	350	510	160	2	55°53'N	11°58'E	Denmark	FACE	g N m-2	Warming	Table 2	*	No	Heathland	*	0.014	0.044	0.00979796	0.0391918	6	6	1.1451	0.214		0.014	0.044	0.00979796	0.0391918	6	6	1.1451	0.214		*	*	*	*	*	*	*	*
Larsen et al. 2011	12	350	510	160	2	55°53'N	11°58'E	Denmark	FACE	g N m-2	Warming + Drought	Table 2	*	No	Heathland	*	0.02	0.055	0.0342929	0.0391918	6	6	1.0116	0.5749		0.02	0.055	0.0342929	0.0391918	6	6	1.0116	0.5749		*	*	*	*	*	*	*	*
Lichter et al. 2008	13	365	560	195	9	35°58' N	79°5' W	USA	FACE	g N m-2 land	No	Fig. 1c	*	No	Forest	*	18.17	23.55	1.46879	2.33366	3	3	0.2594	0.0055		16.25	20.4	3.63731	1.29904	3	3	0.2274	0.0181		19.13	25.125	1.59111	3.5683	3	3	0.2726	0.009
Liu et al. 2007	14	360	560	200	6	45°40.5' N	89°37.5' W	USA	FACE	g N m-2 land	No	Table 3	*	No	Forest	Aspen	3.42	3.9	0.900666	1.12583	3	3	0.1313	0.0509		*	*	*	*	*	*	*	*		3.42	3.9	0.900666	1.12583	3	3	0.1313	0.0509
Liu et al. 2007	15	360	560	200	6	45°40.5' N	89°37.5' W	USA	FACE	g N m-2 land	No	Table 3	*	No	Forest	Birch-Aspen	3.11	3.51	0.831384	0.640859	3	3	0.121	0.0349		*	*	*	*	*	*	*	*		3.11	3.51	0.831384	0.640859	3	3	0.121	0.0349
Liu et al. 2007	16	360	560	200	6	45°40.5' N	89°37.5' W	USA	FACE	g N m-2 land	O3	Table 3	*	No	Forest	Aspen	2.5	3.3	0.796743	0.173205	3	3	0.2776	0.0348		*	*	*	*	*	*	*	*		2.5	3.3	0.796743	0.173205	3	3	0.2776	0.0348
Liu et al. 2007	17	360	560	200	6	45°40.5' N	89°37.5' W	USA	FACE	g N m-2 land	O3	Table 3	*	No	Forest	Birch-Aspen	2.23	2.78	0.103923	0.190526	3	3	0.2204	0.0023		*	*	*	*	*	*	*	*		2.23	2.78	0.103923	0.190526	3	3	0.2204	0.0023
Niklaus et al. 2003	18	360	600	240	6	47°33' N	7°34' E	Switzerland	OTC	g N m-2 land	No	Fig. 7	*	No	Grassland	*	1	1	0.282843	0.282843	8	8	0	0.02		*	*	*	*	*	*	*	*		1	1	0.282843	0.282843	8	8	0	0.02
Norby & Iversen 2006	19	319	544	225	6	35°54'N	84°20' W	USA	FACE	kg N ha-1 land	No	Fig. 4a	*	No	Forest	Sweetgum	37.1901	35.4683	1.07942	0.835785	3	2	-0.0474	0.0006		37.6033	38.7052	1.58701	1.10879	3	2	0.0289	0.001		36.7769	32.2314	1.55988	1.35799	3	2	-0.1319	0.0015
Polley et al. 1997	20	385	690	305	1.08333	*	*	*	GC	g container-1	No	Fig. 4	385 ppm vs. 690 ppm	No	Forest	A. smallii	0.240385	2.16346	0.0240385	0.216346	3	3	2.1972	0.0067		0.240385	2.16346	0.0240385	0.216346	3	3	2.1972	0.0067		*	*	*	*	*	*	*	*
Polley et al. 1997	21	385	980	595	1.08333	*	*	*	GC	g container-1	No	Fig. 4	385 ppm vs. 980 ppm	No	Forest	A. smallii	0.240385	6.25	0.0240385	0.625	3	3	3.258	0.0067		0.240385	6.25	0.0240385	0.625	3	3	3.258	0.0067		*	*	*	*	*	*	*	*
Schlesinger & Lichter 2001	22	365	565	200	3	35°58' N	79°5' W	USA	FACE	g m-2	No	Table 1 (Total N)	*	No	Forest	Loblolly pine	16.55	20.57	3.87979	1.29904	3	3	0.2174	0.0196		16.55	20.57	3.87979	1.29904	3	3	0.2174	0.0196		*	*	*	*	*	*	*	*
Talhelm et al. 2012	23	374	531	157	11	45°40.5' N	89°37.5' W	USA	FACE	g N m-2 land	No	Fig. 3	*	No	Forest	Aspen	2.33099	2.88028	0.195161	0.219556	3	3	0.2116	0.0043		*	*	*	*	*	*	*	*		2.33099	2.88028	0.195161	0.219556	3	3	0.2116	0.0043
Talhelm et al. 2012	24	374	531	157	11	45°40.5' N	89°37.5' W	USA	FACE	g N m-2 land	No	Fig. 3	*	No	Forest	Aspen-Birch	2.2993	2.56338	0.170766	0.292741	3	3	0.1087	0.0062		*	*	*	*	*	*	*	*		2.2993	2.56338	0.170766	0.292741	3	3	0.1087	0.0062
Talhelm et al. 2012	25	374	531	157	11	45°40.5' N	89°37.5' W	USA	FACE	g N m-2 land	No	Fig. 3	*	No	Forest	Aspen-Maple	1.57042	2.28873	0.341531	0.317136	3	3	0.3767	0.0222		*	*	*	*	*	*	*	*		1.57042	2.28873	0.341531	0.317136	3	3	0.3767	0.0222
Talhelm et al. 2012	26	374	531	157	11	45°40.5' N	89°37.5' W	USA	FACE	g N m-2 land	O3	Fig. 3	*	No	Forest	Aspen	1.79225	2.36268	0.170766	0.243951	3	3	0.2763	0.0066		*	*	*	*	*	*	*	*		1.79225	2.36268	0.170766	0.243951	3	3	0.2763	0.0066
Talhelm et al. 2012	27	374	531	157	11	45°40.5' N	89°37.5' W	USA	FACE	g N m-2 land	O3	Fig. 3	*	No	Forest	Aspen-Birch	1.69718	2.56338	0.170766	0.195161	3	3	0.4124	0.0053		*	*	*	*	*	*	*	*		1.69718	2.56338	0.170766	0.195161	3	3	0.4124	0.0053
Talhelm et al. 2012	28	374	531	157	11	45°40.5' N	89°37.5' W	USA	FACE	g N m-2 land	O3	Fig. 3	*	No	Forest	Aspen-Maple	1.5493	1.84507	0.268346	0.243951	3	3	0.1747	0.0158		*	*	*	*	*	*	*	*		1.5493	1.84507	0.268346	0.243951	3	3	0.1747	0.0158
Torbet et al. 2004	29	357	750	393	3	32.6° N	85.5°W	USA	OTC	kg N ha-1	Nitrogen	Table 4	101 kg N ha-1	Yes	Cropland	sorghum	20.8667	24.5	2.08667	2.45	3	3	0.1605	0.0067		20.8667	24.5	2.08667	2.45	3	3	0.1605	0.0067		*	*	*	*	*	*	*	*
Torbet et al. 2004	30	357	750	393	3	32.6° N	85.5°W	USA	OTC	kg N ha-1	Nitrogen	Table 4	34 kg N ha-1	Yes	Cropland	soybean	142.7	169.7	14.27	16.97	3	3	0.1733	0.0067		142.7	169.7	14.27	16.97	3	3	0.1733	0.0067		*	*	*	*	*	*	*	*
Zak et al. 2007 and 2011	31	374	531	157	12	45°40.5' N	89°37.5' W	USA	FACE	g N m-2 land	O3; average of contral and O3	Fig. 2; upper right panel	*	No	Forest	Across plant community type	3.52198	4.07998	0.670765	0.845946	3	3	0.1471	0.0264		*	*	*	*	*	*	*	*		3.52198	4.07998	0.670765	0.845946	3	3	0.1471	0.0264

## Sheet: SNP
																	Total									Short-term									Long-term
Reference	Obs	Ambient CO2 (ppm)	Elevated CO2 (ppm)	CO2 difference (ppm)	Treatment duration (years)	Latitude	Longitude	Country	Fercility	Unit	Other treatments	Data location	Notes	Nitrogen addition	Ecosystem	Vegetation	Mean_a	Mean_e	Std_a	Std_e	N_a	N_e	lnR	Var(lnR)		Mean_a	Mean_e	Std_a	Std_e	N_a	N_e	lnR	Var(lnR)		Mean_a	Mean_e	Std_a	Std_e	N_a	N_e	lnR	Var(lnR)
Carnol et al. 2002	1	350	750	400	4	*	*	Germany	OTC	*	No	Table 1	Sum of upper and lower soil layers	No	Forest	Coniferous	0.18	0.17	0.0120416	0.00948683	5	5	-0.0572	0.0015		*	*	*	*	*	*	*	*		0.18	0.17	0.0120416	0.00948683	5	5	-0.0572	0.0015
Cheng et al. 2011	2	382	551	169	4	35°43' N	78°40' W	USA	OTC	g N m-2 land	Nitrogen	Table 2	*	Yes	Cropland	Soybean + Wheat	89.7	86	13.2276	11.5431	4	4	-0.0421	0.0099		85.7	76.4	16.4	21.4	4	4	-0.1149	0.0288		93.7	95.6	23.4	12.8	4	4	0.0201	0.0201
Cheng et al. 2011	3	382	551	169	4	35°43' N	78°40' W	USA	OTC	g N m-2 land	Nitrogen + O3	Table 2	*	Yes	Cropland	Soybean + Wheat	82.05	86.3	15.0886	8.67015	4	4	0.0505	0.011		74.1	75.1	32	9.4	4	4	0.0134	0.0505		90	97.5	6.2	16.2	4	4	0.08	0.0081
de Graaff et al. 2009	4	392	792	400	0.0876712	*	*	USA	GC	μg N g-1 dry soil	No	Table 6	Wild	No	Cropland	Wheat	1.2	1.01	0.128172	0.0848705	3	3	-0.1724	0.0062		1.2	1.01	0.128172	0.0848705	3	3	-0.1724	0.0062		*	*	*	*	*	*	*	*
de Graaff et al. 2009	5	392	792	400	0.0876712	*	*	USA	GC	μg N g-1 dry soil	No	Table 6	Cultivated	No	Cropland	Wheat	1.24	1.45	0.136832	0.259808	3	3	0.1565	0.0148		1.24	1.45	0.136832	0.259808	3	3	0.1565	0.0148		*	*	*	*	*	*	*	*
Dijkstra et al. 2005	6	372	560	188	4	45° N	93° W	USA	FACE	%	Nitrogen	Table 2	Monoculture plots	Yes	Grassland	Abandoned agricultural field	0.058	0.054	0.016	0.008	64	64	-0.0715	0.0015		*	*	*	*	*	*	*	*		0.058	0.054	0.016	0.008	64	64	-0.0715	0.0015
Dijkstra et al. 2005	7	372	560	188	4	45° N	93° W	USA	FACE	%	Nitrogen	Table 2	four species plots	Yes	Grassland	Abandoned agricultural field	0.061	0.055	0.0116619	0.0116619	34	34	-0.1035	0.0024		*	*	*	*	*	*	*	*		0.061	0.055	0.0116619	0.0116619	34	34	-0.1035	0.0024
Dorodnikov et al. 2011	8	380	540	160	4	48°42' N	9°12' E	Germany	FACE	mg N g-1 dry soil	Fertilizer	Table 2	*	Yes	Cropland	Wheat	1.75333	1.75333	0.0436812	0.0396826	5	5	0	0.0002		1.7375	1.7425	0.0492042	0.0435286	5	5	0.0029	0.0003		1.785	1.775	0.0906765	0.0849837	5	5	-0.0056	0.001
Garten et al. 2011	9	391	544	153	11	35°54' N	84°24'W	USA	FACE	g N kg-1	No	Table 1	*	No	Forest	Deciduous	0.94	1.04	0.069282	0.0282843	3	2	0.1011	0.0022		*	*	*	*	*	*	*	*		0.94	1.04	0.069282	0.0282843	3	2	0.1011	0.0022
Gill et al. 2002	10	290	450	160	3	*	*	*	GC	g N m-2	No	From Luo et al. 2006	*	No	Grassland	*	192.4	211.5	6.31	8.33	8	8	0.0946	0.0003		192.4	211.5	6.31	8.33	8	8	0.0946	0.0003		*	*	*	*	*	*	*	*
Guenet et al. 2012	11	370	440	70	11	50°35' N	8°41' E	Germany	FACE	%	Nitrogen	Table 2	40 kg N ha-1 yr-1)	Yes	Grassland	*	0.39	0.48	0.08	0.07	3	3	0.2076	0.0211		*	*	*	*	*	*	*	*		0.39	0.48	0.08	0.07	3	3	0.2076	0.0211
Hartwig et al. 2002	12	350	600	250	4	47°27'N	8°41'E	Switzerland	FACE	g N m-2 land	Low Nitrogen	Table 5	*	Yes	Grassland	Lolium perenne	223	211	22.3	21.1	3	3	-0.0553	0.0067		*	*	*	*	*	*	*	*		223	211	22.3	21.1	3	3	-0.0553	0.0067
Hartwig et al. 2002	13	350	600	250	4	47°27'N	8°41'E	Switzerland	FACE	g N m-2 land	Low Nitrogen	Table 5	*	Yes	Grassland	Trifolium repens	226	239	22.6	23.9	3	3	0.0559	0.0067		*	*	*	*	*	*	*	*		226	239	22.6	23.9	3	3	0.0559	0.0067
Hartwig et al. 2002	14	350	600	250	4	47°27'N	8°41'E	Switzerland	FACE	g N m-2 land	High Nitrogen	Table 5	*	Yes	Grassland	Lolium perenne	240	271	24	27.1	3	3	0.1215	0.0067		*	*	*	*	*	*	*	*		240	271	24	27.1	3	3	0.1215	0.0067
Hartwig et al. 2002	15	350	600	250	4	47°27'N	8°41'E	Switzerland	FACE	g N m-2 land	High Nitrogen	Table 5	*	Yes	Grassland	Trifolium repens	236	241	23.6	24.1	3	3	0.021	0.0067		*	*	*	*	*	*	*	*		236	241	23.6	24.1	3	3	0.021	0.0067
Hoosbeek & Scarascia-Mugnozza 2009	16	370	550	180	6	42°37'N	11°51'E	Italy	FACE	g N m-2 land	No	Table 3	*	No	Forest	Deciduous	148.9	156.9	5.73149	8.47644	3	3	0.0523	0.0015		*	*	*	*	*	*	*	*		148.9	156.9	5.73149	8.47644	3	3	0.0523	0.0015
Hoosbeek et al. 2011	17	*	580	*	4	53°14'N	4°00'W	UK	FACE	g N m-2 land	No	Fig. 1b	*	No	Forest	Deciduous	303.864	298.409	6.36364	7.11186	4	4	-0.0181	0.0003		293.636	286.97	8.29581	9.18955	4	4	-0.023	0.0005		334.545	332.727	7.27273	9.09091	4	4	-0.0054	0.0003
Hovenden et al. 2008	18	*	550	*	3	42°42' S	147°16' E	Australia	FACE	ug N resin-1 14 day-1	No	Fig. 1	*	No	Grassland	*	10.509	7.69787	0.887356	1.06986	3	3	-0.3113	0.0088		10.509	7.69787	0.887356	1.06986	3	3	-0.3113	0.0088		*	*	*	*	*	*	*	*
Hovenden et al. 2008	19	*	550	*	3	42°42' S	147°16' E	Australia	FACE	ug N resin-1 14 day-1	Warming	Fig. 1	*	No	Grassland	*	10.3777	10.4828	1.03444	1.29331	3	3	0.0101	0.0084		10.3777	10.4828	1.03444	1.29331	3	3	0.0101	0.0084		*	*	*	*	*	*	*	*
Hungate et al. 2006	20	350	686	336	7	28°38' N	80°42' W	USA	OTC	g N m-2 land	No	Table 6	*	No	Forest	*	118.27	110.24	24.0699	32.5552	8	8	-0.0703	0.0161		*	*	*	*	*	*	*	*		118.27	110.24	24.0699	32.5552	8	8	-0.0703	0.0161
Iverson et al. 2012	21	396	565	169	12	35°54' N	84°20' W	USA	FACE	kg N m-3	No	Table 1	*	No	Forest	Liquidambar styraciflua L.	0.87	0.98	0.069282	0.155563	3	2	0.1191	0.0147		*	*	*	*	*	*	*	*		0.87	0.98	0.069282	0.155563	3	2	0.1191	0.0147
Jastrow et al. 2005	22	391	542	151	3	35°54' N	84°24'W	USA	FACE	g N m-2 land	No	Fig. 1c	*	No	Forest	Deciduous	95.092	99.5092	5.31304	12.3263	3	3	0.0454	0.0062		95.092	99.5092	5.31304	12.3263	3	3	0.0454	0.0062		*	*	*	*	*	*	*	*
Jastrow et al. 2005	23	391	542	151	5	35°54' N	84°24'W	USA	FACE	g N m-2 land	No	Fig. 1c	*	No	Forest	Deciduous	90.7975	100.613	5.31304	10.4136	3	3	0.1027	0.0047		*	*	*	*	*	*	*	*		90.7975	100.613	5.31304	10.4136	3	3	0.1027	0.0047
Jastrow et al. 2005	24	380	760	380	8	39.12° N	96.35° W	USA	OTC	g N m-2 land	No	Table 1	*	No	Grassland	*	837	865	51.4393	83.2827	6	6	0.0329	0.0022		*	*	*	*	*	*	*	*		837	865	51.4393	83.2827	6	6	0.0329	0.0022
Johnson et al. 2006	25	350	612.5	262.5	6	38°44' N	120°45' W	USA	OTC	kg N ha-2 land	No	Fig. 5	*	No	Forest	Evergreen	3789.16	3443.91	286.314	434.687	3	3	-0.0955	0.0072		3484.49	3323.77	357.848	547.725	3	3	-0.0472	0.0126		4398.5	3684.21	586.032	876.029	3	3	-0.1772	0.0248
Johnson et al. 2006	26	350	700	350	6	38°44' N	120°45' W	USA	OTC	kg N ha-2 land	Low Nitrogen	Fig. 5	*	Yes	Forest	Evergreen	3838.2	3237.2	159.142	111.055	3	3	-0.1703	0.001		3520.46	3164.06	198.956	148.215	3	3	-0.1067	0.0018		4473.68	3383.46	325.573	195.344	3	3	-0.2793	0.0029
Johnson et al. 2006	27	350	612.5	262.5	6	38°44' N	120°45' W	USA	OTC	kg N ha-2 land	High Nitrogen	Fig. 5	*	Yes	Forest	Evergreen	3400.13	3697.36	286.214	264.511	3	3	0.0838	0.0041		3145.31	3581.75	393.768	351.886	3	3	0.1299	0.0084		3909.77	3928.57	455.803	469.549	3	3	0.0048	0.0093
Johnson et al. 2004	28	*	542	*	2	35°54' N	84°20' W	USA	FACE	kg N ha-1 land	No	Table 2	*	No	Forest	*	8561	9794	856.1	979.4	3	2	0.1346	0.0083		8561	9794	856.1	979.4	3	2	0.1346	0.0083		*	*	*	*	*	*	*	*
Kammann et al. 2008	29	*	*	*	6	50°32' N	8°41.3' E	Germany	FACE	mg N g-1 soil	Nitrogen	Table 4	*	Yes	Grassland	*	20.11	21.68	1.83802	1.88372	3	3	0.0752	0.0053		*	*	*	*	*	*	*	*		20.11	21.68	1.83802	1.88372	3	3	0.0752	0.0053
Kanerva et al. 2006	30	438	487	49	2.5	60°49' N	23°28' E	Finland	OTC	%	Fertilizer	Table 4	*	Yes	Grassland	*	0.0866667	0.0833333	0.0108012	0.005	3	3	-0.04	0.0064		0.0866667	0.0833333	0.0108012	0.005	3	3	-0.04	0.0064		*	*	*	*	*	*	*	*
Kanerva et al. 2006	31	438	486	48	2.5	60°49' N	23°28' E	Finland	OTC	%	Fertilizer + O3	Table 4	*	Yes	Grassland	*	0.08	0.08	0.005	0.005	3	3	0	0.0026		0.08	0.08	0.005	0.005	3	3	0	0.0026		*	*	*	*	*	*	*	*
Lam et al. 2013 (PS)	32	390	700	310	0.666667	36°43' S	142°10' E	Australia	GC	mg pot-1	No	Table 2	Sum across depths	No	Cropland	Field pea	6278	6355	627.8	635.5	2	2	0.0122	0.01		6278	6355	627.8	635.5	2	2	0.0122	0.01		*	*	*	*	*	*	*	*
Lam et al. 2013 (PS_2)	33	390	700	310	0.416667	36°43' S	142°10' E	Australia	GC	mg pot-1	No	Table 4	cereal-legume soil	No	Cropland	wheat	1060.42	1046.18	32.0015	37.8026	4	4	-0.0135	0.0006		1060.42	1046.18	32.0015	37.8026	4	4	-0.0135	0.0006		*	*	*	*	*	*	*	*
Lam et al. 2013 (PS_2)	34	390	700	310	0.416667	36°43' S	142°10' E	Australia	GC	mg pot-1	Residue	Table 4	cereal-legume soil	No	Cropland	wheat	1105.67	1139.4	15.8018	24.6043	4	4	0.0301	0.0002		1105.67	1139.4	15.8018	24.6043	4	4	0.0301	0.0002		*	*	*	*	*	*	*	*
Lam et al. 2013 (PS_2)	35	390	700	310	0.416667	36°43' S	142°10' E	Australia	GC	mg pot-1	No	Table 4	cereal-fallow soil	No	Cropland	wheat	749.82	743.29	10.8147	10.4013	4	4	-0.0087	0.0001		749.82	743.29	10.8147	10.4013	4	4	-0.0087	0.0001		*	*	*	*	*	*	*	*
Lam et al. 2013 (PS_2)	36	390	700	310	0.416667	36°43' S	142°10' E	Australia	GC	mg pot-1	Residue	Table 4	cereal-fallow soil	No	Cropland	wheat	797.54	780.28	12.8041	10.0222	4	4	-0.0219	0.0001		797.54	780.28	12.8041	10.0222	4	4	-0.0219	0.0001		*	*	*	*	*	*	*	*
Langley et al. 2009	37	*	*	350	6	28°38' N	80°42' W	USA	OTC	mg N kg-1 soil	No	Table 2	Sum across depths	No	Forest	Oaks	926	790	196.02	238.227	8	8	-0.1588	0.017		*	*	*	*	*	*	*	*		926	790	196.02	238.227	8	8	-0.1588	0.017
Larsen et al. 2011	38	350	510	160	2	55°53'N	11°58'E	Denmark	FACE	g N m-2	No	Table 2	*	No	Heathland	*	182.109	215.735	21.0804	62.9573	6	6	0.1694	0.0164		182.109	215.735	21.0804	62.9573	6	6	0.1694	0.0164		*	*	*	*	*	*	*	*
Larsen et al. 2011	39	350	510	160	2	55°53'N	11°58'E	Denmark	FACE	g N m-2	Drought	Table 2	*	No	Heathland	*	195.504	236.233	47.2802	157.995	6	6	0.1892	0.0843		195.504	236.233	47.2802	157.995	6	6	0.1892	0.0843		*	*	*	*	*	*	*	*
Larsen et al. 2011	40	350	510	160	2	55°53'N	11°58'E	Denmark	FACE	g N m-2	Warming	Table 2	*	No	Heathland	*	148.785	156.108	17.8906	29.4137	6	6	0.048	0.0083		148.785	156.108	17.8906	29.4137	6	6	0.048	0.0083		*	*	*	*	*	*	*	*
Larsen et al. 2011	41	350	510	160	2	55°53'N	11°58'E	Denmark	FACE	g N m-2	Warming + Drought	Table 2	*	No	Heathland	*	156.21	202.343	37.9705	68.5877	6	6	0.2588	0.029		156.21	202.343	37.9705	68.5877	6	6	0.2588	0.029		*	*	*	*	*	*	*	*
Lichter et al. 2008	42	365	560	195	9	35°58' N	79°5' W	USA	FACE	g N m-2 land	No	Table 3	*	No	Forest	*	113.667	119	9.28089	9.22022	3	3	0.0459	0.0042		106	119	14.7224	23.5559	3	3	0.1157	0.0195		117.5	119	12.7818	9.64645	3	3	0.0127	0.0061
Long et al. 2012	43	365	565	200	10	35°59' N	79°06' W	USA	FACE	%	No	Table 1	*	No	Forest	Loblolly pine	0.24	0.27	0.0556776	0.0781025	3	3	0.1178	0.0458		*	*	*	*	*	*	*	*		0.24	0.27	0.0556776	0.0781025	3	3	0.1178	0.0458
Long et al. 2012	44	365	565	200	10	35°59' N	79°06' W	USA	FACE	%	Nitrogen	Table 1	11.2 g N m-2 y-1	Yes	Forest	Loblolly pine	0.24	0.236667	0.06	0.0404145	3	3	-0.0138	0.0305		*	*	*	*	*	*	*	*		0.24	0.236667	0.06	0.0404145	3	3	-0.0138	0.0305
Martin-Olmedo et al. 2002	45	396	716	320	0.0684932	*	*	*	GC	mg N g-1 soil	Low Nitrogen	Table 4	*	Yes	Cropland	Barley	925.3	1167	585.486	659.701	17	17	0.2321	0.0423		925.3	1167	585.486	659.701	17	17	0.2321	0.0423		*	*	*	*	*	*	*	*
Martin-Olmedo et al. 2002	46	396	716	320	0.0684932	*	*	*	GC	mg N g-1 soil	High Nitrogen	Table 4	*	Yes	Cropland	Barley	1183.2	1037.3	915.519	581.405	17	17	-0.1316	0.0537		1183.2	1037.3	915.519	581.405	17	17	-0.1316	0.0537		*	*	*	*	*	*	*	*
Niklaus et al. 2003	47	360	600	240	6	47°33' N	7°34' E	Switzerland	OTC	g N m-2 land	No	Fig. 7	*	No	Grassland	*	410	413	42.4264	48.0833	8	8	0.0073	0.003		*	*	*	*	*	*	*	*		410	413	42.4264	48.0833	8	8	0.0073	0.003
Nitschelm et al. 1997	48	350	600	250	0.666667	47°27'N	8°41'E	Switzerland	FACE	g box-1	No	Table 2	*	No	Cropland	White clover	0.151	0.155	0.0151	0.0155	3	3	0.0261	0.0067		0.151	0.155	0.0151	0.0155	3	3	0.0261	0.0067		*	*	*	*	*	*	*	*
Ross et al. 2013	49	*	475	*	10	40°14' S	173°16' E	New Zealand	FACE	g kg-1 soil	Fertillizer without N	Fig. 3c	*	No	Grassland	*	4.33558	4.28437	0.082951	0.0868808	3	3	-0.0119	0.0003		4.3212	4.1487	0.144877	0.168523	3	3	-0.0407	0.0009		4.34174	4.34251	0.103223	0.103765	3	3	0.0002	0.0004
Ross et al. 1995	50	350	700	350	0.60274	40°14' S	173°16' E	New Zealand	GC	%	No	Fig. 2	*	No	Grassland	*	0.363758	0.360403	0.0363758	0.0360403	6	6	-0.0094	0.0033		0.363758	0.360403	0.0363758	0.0360403	6	6	-0.0094	0.0033		*	*	*	*	*	*	*	*
Schlesinger & Lichter 2001	51	365	565	200	3	35°58' N	79°5' W	USA	FACE	g m-2	No	Table 1 (Total N)	0 - 30 cm (Sum across layers)	No	Forest	Loblolly pine	146.6	164.8	16.1981	23.7392	3	3	0.117	0.011		146.6	164.8	16.1981	23.7392	3	3	0.117	0.011		*	*	*	*	*	*	*	*
Tscherko et al. 2001	52	*	*	200	0.75	*	*	*	GC	%	No	Table 3 & Table 3	Average across 3 generations	No	Grassland	*	0.116667	0.123333	0.00766965	0.0207695	6	6	0.055	0.0055		0.116667	0.123333	0.00766965	0.0207695	6	6	0.055	0.0055		*	*	*	*	*	*	*	*
Tscherko et al. 2001	53	*	*	200	0.75	*	*	*	GC	%	Warming	Table 3 & Table 3	Average across 3 generations	No	Grassland	*	0.123333	0.146667	0.0129099	0.0129099	6	6	0.1738	0.0031		0.123333	0.146667	0.0129099	0.0129099	6	6	0.1738	0.0031		*	*	*	*	*	*	*	*
van Groenigen et al. 2002	54	350	600	250	8	47°27' N	8°40' E	Switzerland	FACE	g N m-2 land	Low Nitrogen	Table 2	140 kg N ha-1	Yes	Grassland	White clover & ryegrass	362	377	76.2102	27.7128	3	3	0.0406	0.0166		*	*	*	*	*	*	*	*		362	377	76.2102	27.7128	3	3	0.0406	0.0166
van Groenigen et al. 2002	55	350	600	250	8	47°27' N	8°40' E	Switzerland	FACE	g N m-2 land	High Nitrogen	Table 2	560 kg N ha-1	Yes	Grassland	White clover & ryegrass	329	331	100.459	76.2102	3	3	0.0061	0.0487		*	*	*	*	*	*	*	*		329	331	100.459	76.2102	3	3	0.0061	0.0487
van Kessel et al. 2006	56	350	600	250	10	47°27' N	8°40' E	Switzerland	FACE	kg ha-1	Nitrogen	Table 2	322 kg N ha-1; average of low and high N treatments	Yes	Grassland	White clover & ryegrass	5884	6142	588.4	614.2	3	3	0.0429	0.0067		*	*	*	*	*	*	*	*		5884	6142	588.4	614.2	3	3	0.0429	0.0067
Verburg et al. 2004	57	365	700	335	0.213699	*	*	*	GC	%	No	Fig. 5	Unlabeled bulk soil	No	Forest	Pine	0.0248227	0.0349173	0.00628842	0.010591	4	4	0.3416	0.0392		0.0248227	0.0349173	0.00628842	0.010591	4	4	0.3416	0.0392		*	*	*	*	*	*	*	*
Verburg et al. 2004	58	365	700	335	0.213699	*	*	*	GC	%	No	Fig. 5	Unlabeled rhizosphere soil	No	Forest	Pine	0.0400473	0.0450118	0.000330969	0.00562648	4	4	0.1178	0.0039		0.0400473	0.0450118	0.000330969	0.00562648	4	4	0.1178	0.0039		*	*	*	*	*	*	*	*
Verburg et al. 2004	59	365	700	335	0.213699	*	*	*	GC	%	No	Fig. 5	Labeled bulk soil	No	Forest	Pine	0.0352482	0.0326005	0.00529551	0.00496454	4	4	-0.0767	0.0115		0.0352482	0.0326005	0.00529551	0.00496454	4	4	-0.0767	0.0115		*	*	*	*	*	*	*	*
Verburg et al. 2004	60	365	700	335	0.213699	*	*	*	GC	%	No	Fig. 5	Labeled rhizosphere soil	No	Forest	Pine	0.0402128	0.0473286	0.0135697	0.0208511	4	4	0.1626	0.0774		0.0402128	0.0473286	0.0135697	0.0208511	4	4	0.1626	0.0774		*	*	*	*	*	*	*	*
Williams et al. 2000	61	335	*	*	8	39.12° N	96.35° W	USA	OTC	g kg-1 soil	No	Table 4	*	No	Grassland	Grass	3.225	3.48	0.3225	0.348	3	3	0.0761	0.0067		*	*	*	*	*	*	*	*		3.225	3.48	0.3225	0.348	3	3	0.0761	0.0067
Zak et al. 2007	62	374	531	157	7	45°40.5' N	89°37.5' W	USA	FACE	g N m-2 land	O3; average of contral and O3	Table 2	*	No	Forest	Across plant community type	181.8	187.2	26.154	42.7817	3	3	0.0293	0.0243		*	*	*	*	*	*	*	*		181.8	187.2	26.154	42.7817	3	3	0.0293	0.0243
Zak et al. 1993	63	342	692	350	0.416667	45°34' N	84°41' W	USA	OTC	mg N g-1 soil	Nitrogen	Table 2	4.5 g N m-2; Rhizosphere soil	Yes	Forest	Populus grandidentata	100	109	23.8	35.2	4	4	0.0862	0.0402		100	109	23.8	35.2	4	4	0.0862	0.0402		*	*	*	*	*	*	*	*
Zak et al. 1993	64	342	692	350	0.416667	45°34' N	84°41' W	USA	OTC	mg N g-1 soil	Nitrogen	Table 2	4.5 g N m-2; bulk soil	Yes	Forest	Populus grandidentata	79	73	22.2	21.2	4	4	-0.079	0.0408		79	73	22.2	21.2	4	4	-0.079	0.0408		*	*	*	*	*	*	*	*

## Sheet: Fixation
																		Total									Short-term									Long-term
Reference	Obs	Ambient CO2 (ppm)	Elevated CO2 (ppm)	CO2 difference (ppm)	Treatment duration (years)	Latitude	Longitude	Country	Fercility	Unit	Other treatments	Data location	Notes	Nitrogen addition	Ecosystem	Vegetation	Method	Mean_a	Mean_e	Std_a	Std_e	N_a	N_e	lnR	Var(lnR)		Mean_a	Mean_e	Std_a	Std_e	N_a	N_e	lnR	Var(lnR)		Mean_a	Mean_e	Std_a	Std_e	N_a	N_e	lnR	Var(lnR)
Arnone 1999	1	355	680	325	4	46°35' N	8°23' E	Sweden	OTC	mg N m-2 land year-1	No	Table 1	*	No	Grassland	*	Isotope	96	52	190.526	93.5307	12	12	-0.6131	0.5978		*	*	*	*	*	*	*	*		96	52	190.526	93.5307	12	12	-0.6131	0.5978
Arnone & Gordon 1990	2	350	650	300	0.128767	*	*	USA	GC	μmol C2H4 plant-1 h-1	Nodulation	Fig.4b; C2H4 production;	*	No	Forest	Broadleaf	C2H2	22.3742	37.7968	5.86096	8.32421	5	5	0.5243	0.0234		22.3742	37.7968	5.86096	8.32421	5	5	0.5243	0.0234		*	*	*	*	*	*	*	*
Arnone & Gordon 1990	3	350	650	300	0.128767	*	*	USA	GC	μmol C2H4 plant-1 h-1	Nodulation + Nitrogen	Fig.4b; C2H4 production;	*	Yes	Forest	Broadleaf	C2H2	23.0199	46.7236	18.0075	6.79519	5	5	0.7079	0.1266		23.0199	46.7236	18.0075	6.79519	5	5	0.7079	0.1266		*	*	*	*	*	*	*	*
Baslam et al. 2012	4	395	710	315	0.172603	*	*	*	GC	mmol H2 plant-1 min-1	No	Fig. 4c; average of 2nd and 3rd harvests	*	No	Cropland	Alfalfa	H2	0.0360694	0.0218497	0.00360427	0.00110766	3	3	-0.5044	0.0042		0.0360694	0.0218497	0.00360427	0.00110766	3	3	-0.5044	0.0042		*	*	*	*	*	*	*	*
Baslam et al. 2012	5	395	710	315	0.172603	*	*	*	GC	mmol H2 plant-1 min-1	Mycorrhizal	Fig. 4c; average of 2nd and 3rd harvests	*	No	Cropland	Alfalfa	H2	0.040578	0.0287861	0.00227954	0.00169907	3	3	-0.3434	0.0022		0.040578	0.0287861	0.00227954	0.00169907	3	3	-0.3434	0.0022		*	*	*	*	*	*	*	*
Billings et al. 2003	6	350	550	200	3.8	36°49'N	115°55'W	USA	FACE	μmol m-2 land h-1	No	Table 1; C2H4 production; Average across vegetation cover	*	No	Desert	Shrubland	C2H2	16.9	113.463	7.0093	90.639	3	3	1.9042	0.2701		*	*	*	*	*	*	*	*		16.9	113.463	7.0093	90.639	3	3	1.9042	0.2701
Cabrerizo et al. 2001	7	360	1000	640	0.0767123	*	*	*	GC	μmol N2 m-1 plant h-1	No	Table 5	*	No	Cropland	Pea	H2	0.56	0.9	0.141421	0.169706	8	8	0.4745	0.0124		0.56	0.9	0.141421	0.169706	8	8	0.4745	0.0124		*	*	*	*	*	*	*	*
Cheng et al. 2011	8	376	555	179	4	35°43' N	78°40' W	USA	OTC	g N m-2 land	Nitrogen	Table 2	*	Yes	Cropland	Soybean	Accumulation	6.95	9.55	0.477493	0.43359	4	4	0.3178	0.0017		6.76667	9.4	0.617914	0.500908	4	4	0.3287	0.0028		7.5	10	0.6	1	4	4	0.2877	0.0041
Cheng et al. 2011	9	376	555	179	4	35°43' N	78°40' W	USA	OTC	g N m-2 land	Nitrogen + O3	Table 2	*	Yes	Cropland	Soybean	Accumulation	5.475	8.725	0.426615	0.718331	4	4	0.466	0.0032		5.8	8.76667	0.489898	0.87178	4	4	0.4131	0.0043		4.5	8.6	1	1.4	4	4	0.6477	0.019
Cheng et al. 2001	10	374.5	683.5	309	0.306849	*	*	Japan	GC	μmol C2H4 kg-1 soil day-1	Fertilizer	Fig. 1; Sum across layers	*	Yes	Cropland	Rice	C2H2	8.42152	10.7788	0.353744	0.324329	3	3	0.2468	0.0009		8.42152	10.7788	0.353744	0.324329	3	3	0.2468	0.0009		*	*	*	*	*	*	*	*
Dakora & Drake 2000	11	364	660	296	0.333333	38°51' N	75°36' W	USA	OTC	ng 15N fixed plant-1 h-1	No	Abstract	*	No	Grassland	Spartina	Isotope	9.8	12.5	3.18434	2.69444	6	6	0.2433	0.0253		9.8	12.5	3.18434	2.69444	6	6	0.2433	0.0253		*	*	*	*	*	*	*	*
Dakora & Drake 2000	12	364	665	301	0.333333	38°51' N	75°36' W	USA	OTC	ng 15N fixed plant-1 h-1	No	Abstract	*	No	Grassland	Scirpus	Isotope	367	611	112.677	183.712	6	6	0.5097	0.0308		367	611	112.677	183.712	6	6	0.5097	0.0308		*	*	*	*	*	*	*	*
Das et al. 2011	13	*	600	*	0.166667	*	*	India	GC	nmol C2H4 g-1 soil day-1	Flood 25 C	Fig. 1; last incubation day	Alluvial soil	No	Cropland	Rice	C2H2	28.642	42.4691	1.97531	1.97531	3	3	0.3939	0.0023		28.642	42.4691	1.97531	1.97531	3	3	0.3939	0.0023		*	*	*	*	*	*	*	*
Das et al. 2011	14	*	600	*	0.166667	*	*	India	GC	nmol C2H4 g-1 soil day-1	Flood 35 C	Fig. 1; last incubation day	Alluvial soil	No	Cropland	Rice	C2H2	39.5349	65.1163	12.7907	0	3	3	0.499	0.0349		39.5349	65.1163	12.7907	0	3	3	0.499	0.0349		*	*	*	*	*	*	*	*
Das et al. 2011	15	*	600	*	0.166667	*	*	India	GC	nmol C2H4 g-1 soil day-1	Flood 45 C	Fig. 1; last incubation day	Alluvial soil	No	Cropland	Rice	C2H2	39.5349	95.3488	11.6279	0	3	3	0.8804	0.0288		39.5349	95.3488	11.6279	0	3	3	0.8804	0.0288		*	*	*	*	*	*	*	*
Das et al. 2011	16	*	600	*	0.166667	*	*	India	GC	nmol C2H4 g-1 soil day-1	Non-flood 25 C	Fig. 1; last incubation day	Alluvial soil	No	Cropland	Rice	C2H2	2.92683	3.21951	0.878049	0.878049	3	3	0.0953	0.0548		2.92683	3.21951	0.878049	0.878049	3	3	0.0953	0.0548		*	*	*	*	*	*	*	*
Das et al. 2011	17	*	600	*	0.166667	*	*	India	GC	nmol C2H4 g-1 soil day-1	Non-flood 35 C	Fig. 1; last incubation day	Alluvial soil	No	Cropland	Rice	C2H2	2.77108	3.01205	1.20482	1.92771	3	3	0.0834	0.1995		2.77108	3.01205	1.20482	1.92771	3	3	0.0834	0.1995		*	*	*	*	*	*	*	*
Das et al. 2011	18	*	600	*	0.166667	*	*	India	GC	nmol C2H4 g-1 soil day-1	Non-flood 45 C	Fig. 1; last incubation day	Alluvial soil	No	Cropland	Rice	C2H2	2.43902	2.80488	0.609756	1.34146	3	3	0.1398	0.0971		2.43902	2.80488	0.609756	1.34146	3	3	0.1398	0.0971		*	*	*	*	*	*	*	*
Das et al. 2011	19	*	600	*	0.166667	*	*	India	GC	nmol C2H4 g-1 soil day-1	Flood 25 C	Fig. 1; last incubation day	Laterite soil	No	Cropland	Rice	C2H2	5.75	6.5	1.75	2.25	3	3	0.1226	0.0708		5.75	6.5	1.75	2.25	3	3	0.1226	0.0708		*	*	*	*	*	*	*	*
Das et al. 2011	20	*	600	*	0.166667	*	*	India	GC	nmol C2H4 g-1 soil day-1	Flood 35 C	Fig. 1; last incubation day	Laterite soil	No	Cropland	Rice	C2H2	6.17284	7.40741	2.16049	2.16049	3	3	0.1823	0.0692		6.17284	7.40741	2.16049	2.16049	3	3	0.1823	0.0692		*	*	*	*	*	*	*	*
Das et al. 2011	21	*	600	*	0.166667	*	*	India	GC	nmol C2H4 g-1 soil day-1	Flood 45 C	Fig. 1; last incubation day	Laterite soil	No	Cropland	Rice	C2H2	5.3012	6.74699	1.44578	1.92771	3	3	0.2412	0.052		5.3012	6.74699	1.44578	1.92771	3	3	0.2412	0.052		*	*	*	*	*	*	*	*
Das et al. 2011	22	*	600	*	0.166667	*	*	India	GC	nmol C2H4 g-1 soil day-1	Non-flood 25 C	Fig. 1; last incubation day	Laterite soil	No	Cropland	Rice	C2H2	0.6	0.7	0.225	0.275	3	3	0.1542	0.0983		0.6	0.7	0.225	0.275	3	3	0.1542	0.0983		*	*	*	*	*	*	*	*
Das et al. 2011	23	*	600	*	0.166667	*	*	India	GC	nmol C2H4 g-1 soil day-1	Non-flood 35 C	Fig. 1; last incubation day	Laterite soil	No	Cropland	Rice	C2H2	0.888889	0.925926	0.185185	0.222222	3	3	0.0408	0.0337		0.888889	0.925926	0.185185	0.222222	3	3	0.0408	0.0337		*	*	*	*	*	*	*	*
Das et al. 2011	24	*	600	*	0.166667	*	*	India	GC	nmol C2H4 g-1 soil day-1	Non-flood 45 C	Fig. 1; last incubation day	Laterite soil	No	Cropland	Rice	C2H2	0.65	0.75	0.1	0.25	3	3	0.1431	0.0449		0.65	0.75	0.1	0.25	3	3	0.1431	0.0449		*	*	*	*	*	*	*	*
Feng & Flessa 2004	25	350	700	350	0.306849	*	*	*	GC	mg N	Nitrogen	Table 1	Nodule dry mass * Nfix per mg nodule	Yes	Forest	Black locust	Isotope	19.257	68.931	6.419	42.849	6	6	1.2752	0.0829		19.257	68.931	6.419	42.849	6	6	1.2752	0.0829		*	*	*	*	*	*	*	*
Hartwig et al. 2002	26	350	600	250	4	47°27'N	8°41'E	Switzerland	FACE	g N m-2 land yr-1	Low Nitrogen	Table 3	*	Yes	Grassland	Trifolium repens	Isotope	15.2	23.4	1.52	2.34	3	3	0.4314	0.0067		*	*	*	*	*	*	*	*		15.2	23.4	1.52	2.34	3	3	0.4314	0.0067
Hartwig et al. 2002	27	350	600	250	4	47°27'N	8°41'E	Switzerland	FACE	g N m-2 land yr-1	High Nitrogen	Table 3	*	Yes	Grassland	Trifolium repens	Isotope	10.6	19.8	1.06	1.98	3	3	0.6248	0.0067		*	*	*	*	*	*	*	*		10.6	19.8	1.06	1.98	3	3	0.6248	0.0067
Hibbs et al. 1995	28	350	700	350	0.40274	*	*	USA	GC	mmol C2H4 plant-1 h-1	No	Table 3	*	No	Forest	Deciduous	C2H2	6.14	6.48	0.614	0.648	16	16	0.0539	0.0013		6.14	6.48	0.614	0.648	16	16	0.0539	0.0013		*	*	*	*	*	*	*	*
Hibbs et al. 1995	29	350	700	350	0.40274	*	*	USA	GC	mmol C2H4 plant-1 h-1	Drought	Table 3	*	No	Forest	Deciduous	C2H2	11.38	7.08	1.138	0.708	16	16	-0.4746	0.0012		11.38	7.08	1.138	0.708	16	16	-0.4746	0.0012		*	*	*	*	*	*	*	*
Hofmockel & Schlesinger 2007	30	365	560	195	6.41667	35°58' N	79°5' W	USA	FACE	kg N ha-1 land month-1	No	Fig. 2	*	No	Forest	Pine	C2H2	0.209375	0.184896	0.0186754	0.0212796	3	3	-0.1244	0.0071		*	*	*	*	*	*	*	*		0.209375	0.184896	0.0186754	0.0212796	3	3	-0.1244	0.0071
Hoque et al. 2001	31	398	589	191	0.331507	39°40' N	141 °E	Japan	FACE	mmol C2H4 kg-1 soil day-1	High Nitrogen	Fig. 2; Sum across layers	*	Yes	Cropland	Rice	C2H2	5.01982	6.12973	0.335341	0.356414	4	4	0.1998	0.002		5.01982	6.12973	0.335341	0.356414	4	4	0.1998	0.002		*	*	*	*	*	*	*	*
Hoque et al. 2001	32	398	625	227	0.331507	39°40' N	141 °E	Japan	FACE	mmol C2H4 kg-1 soil day-1	Standard Nitrogen	Fig. 2; Sum across layers	*	Yes	Cropland	Rice	C2H2	5.77658	7.54234	0.38452	0.25408	4	4	0.2667	0.0014		5.77658	7.54234	0.38452	0.25408	4	4	0.2667	0.0014		*	*	*	*	*	*	*	*
Hoque et al. 2001	33	398	598	200	0.331507	39°40' N	141 °E	Japan	FACE	mmol C2H4 kg-1 soil day-1	Low Nitrogen	Fig. 2; Sum across layers	*	Yes	Cropland	Rice	C2H2	6.98739	12.991	0.306123	0.341495	4	4	0.6201	0.0007		6.98739	12.991	0.306123	0.341495	4	4	0.6201	0.0007		*	*	*	*	*	*	*	*
Hungate et al. 2004	34	350	686	336	7	28°38' N	80°42' W	USA	OTC	g N m-2 land	No	Fig. 1c	*	No	Forest	*	Isotope	0.436863	0.355302	0.108119	0.167213	8	8	-0.2067	0.0353		0.60115	0.6381	0.181392	0.472771	8	8	0.0596	0.08		0.354719	0.213903	0.136471	0.0975239	8	8	-0.5058	0.0445
Lam et al. 2012 (CPS)	35	390	700	310	0.342466	36°43' S	142°10' E	Australia	GC	mg pot-1	No	Fig. 2	Experiment 2; Vertosol	No	Cropland	Chickpea	Isotope	7.22826	4.56522	0.722826	0.456522	4	4	-0.4595	0.005		7.22826	4.56522	0.722826	0.456522	4	4	-0.4595	0.005		*	*	*	*	*	*	*	*
Lam et al. 2012 (CPS)	36	390	700	310	0.342466	36°43' S	142°10' E	Australia	GC	mg pot-1	Phosphorus	Fig. 2	Experiment 2; Vertosol	No	Cropland	Chickpea	Isotope	9.51087	15.5978	0.951087	1.55978	4	4	0.4947	0.005		9.51087	15.5978	0.951087	1.55978	4	4	0.4947	0.005		*	*	*	*	*	*	*	*
Lam et al. 2012 (CPS)	37	390	700	310	0.342466	36°43' S	142°10' E	Australia	GC	mg pot-1	No	Fig. 2	Experiment 2; Calcarosol	No	Cropland	Chickpea	Isotope	25.8696	30.8152	2.58696	3.08152	4	4	0.1749	0.005		25.8696	30.8152	2.58696	3.08152	4	4	0.1749	0.005		*	*	*	*	*	*	*	*
Lam et al. 2012 (CPS)	38	390	700	310	0.342466	36°43' S	142°10' E	Australia	GC	mg pot-1	Phosphorus	Fig. 2	Experiment 2; Calcarosol	No	Cropland	Chickpea	Isotope	23.9674	37.663	2.39674	3.7663	4	4	0.452	0.005		23.9674	37.663	2.39674	3.7663	4	4	0.452	0.005		*	*	*	*	*	*	*	*
Lam et al. 2012 (CPS)	39	390	700	310	0.342466	36°43' S	142°10' E	Australia	GC	mg pot-1	No	Fig. 2	Experiment 2; Vertosol	No	Cropland	Field pea	Isotope	15.5978	11.7935	1.55978	1.17935	4	4	-0.2796	0.005		15.5978	11.7935	1.55978	1.17935	4	4	-0.2796	0.005		*	*	*	*	*	*	*	*
Lam et al. 2012 (CPS)	40	390	700	310	0.342466	36°43' S	142°10' E	Australia	GC	mg pot-1	Phosphorus	Fig. 2	Experiment 2; Vertosol	No	Cropland	Field pea	Isotope	31.5761	25.8696	3.15761	2.58696	4	4	-0.1993	0.005		31.5761	25.8696	3.15761	2.58696	4	4	-0.1993	0.005		*	*	*	*	*	*	*	*
Lam et al. 2012 (CPS)	41	390	700	310	0.342466	36°43' S	142°10' E	Australia	GC	mg pot-1	No	Fig. 2	Experiment 2; Calcarosol	No	Cropland	Field pea	Isotope	29.2935	42.9891	2.92935	4.29891	4	4	0.3836	0.005		29.2935	42.9891	2.92935	4.29891	4	4	0.3836	0.005		*	*	*	*	*	*	*	*
Lam et al. 2012 (CPS)	42	390	700	310	0.342466	36°43' S	142°10' E	Australia	GC	mg pot-1	Phosphorus	Fig. 2	Experiment 2; Calcarosol	No	Cropland	Field pea	Isotope	38.0435	57.0652	3.80435	5.70652	4	4	0.4055	0.005		38.0435	57.0652	3.80435	5.70652	4	4	0.4055	0.005		*	*	*	*	*	*	*	*
Lam et al. 2012 (CPS)	43	390	700	310	0.342466	36°43' S	142°10' E	Australia	GC	mg pot-1	No	Fig. 2	Experiment 2; Vertosol	No	Cropland	Barrel medic	Isotope	9.13043	18.2609	0.913043	1.82609	4	4	0.6932	0.005		9.13043	18.2609	0.913043	1.82609	4	4	0.6932	0.005		*	*	*	*	*	*	*	*
Lam et al. 2012 (CPS)	44	390	700	310	0.342466	36°43' S	142°10' E	Australia	GC	mg pot-1	Phosphorus	Fig. 2	Experiment 2; Vertosol	No	Cropland	Barrel medic	Isotope	28.913	49.837	2.8913	4.9837	4	4	0.5445	0.005		28.913	49.837	2.8913	4.9837	4	4	0.5445	0.005		*	*	*	*	*	*	*	*
Lam et al. 2012 (CPS)	45	390	700	310	0.342466	36°43' S	142°10' E	Australia	GC	mg pot-1	No	Fig. 2	Experiment 2; Calcarosol	No	Cropland	Barrel medic	Isotope	12.1739	42.2283	1.21739	4.22283	4	4	1.2438	0.005		12.1739	42.2283	1.21739	4.22283	4	4	1.2438	0.005		*	*	*	*	*	*	*	*
Lam et al. 2012 (CPS)	46	390	700	310	0.342466	36°43' S	142°10' E	Australia	GC	mg pot-1	Phosphorus	Fig. 2	Experiment 2; Calcarosol	No	Cropland	Barrel medic	Isotope	22.4457	47.9348	2.24457	4.79348	4	4	0.7587	0.005		22.4457	47.9348	2.24457	4.79348	4	4	0.7587	0.005		*	*	*	*	*	*	*	*
Lam et al. 2012 (BFS)	47	415	550	135	0.333333	40°10' N	116°14' E	China	FACE	kg ha-1 yr-1	Fertilizer	Fig. 1	Zhonghua 13; 4.8 kg N ha-1 yr-1	Yes	Cropland	Soybean	Isotope	164.311	275.618	16.4311	27.5618	3	3	0.5173	0.0067		164.311	275.618	16.4311	27.5618	3	3	0.5173	0.0067		*	*	*	*	*	*	*	*
Lam et al. 2012 (BFS)	48	415	550	135	0.333333	40°10' N	116°14' E	China	FACE	kg ha-1 yr-1	Fertilizer	Fig. 1	Zhonghua 35; 4.8 kg N ha-1 yr-1	Yes	Cropland	Soybean	Isotope	72.0848	69.9647	7.20848	6.99647	3	3	-0.0299	0.0067		72.0848	69.9647	7.20848	6.99647	3	3	-0.0299	0.0067		*	*	*	*	*	*	*	*
Luscher et al. 2000	49	350	600	250	2	47°27' N	8°40' E	Switzerland	FACE	g N plant-1	Low Nitrogen	Table 1; sum of effectively and ineffectively noduling	*	Yes	Cropland	Lucerne	Isotope	2.944	4.015	0.2944	0.4015	36	36	0.3103	0.0006		2.944	4.015	0.2944	0.4015	36	36	0.3103	0.0006		*	*	*	*	*	*	*	*
Luscher et al. 2000	50	350	600	250	2	47°27' N	8°40' E	Switzerland	FACE	g N plant-1	High Nitrogen	Table 1; sum of effectively and ineffectively noduling	*	Yes	Cropland	Lucerne	Isotope	3.113	4.01	0.3113	0.401	36	36	0.2532	0.0006		3.113	4.01	0.3113	0.401	36	36	0.2532	0.0006		*	*	*	*	*	*	*	*
Millett et al. 2012	51	380	580	200	4	*	*	UK	FACE	g plant-1	Mix	Fig. 4a	*	No	Forest	A. glutinosa	Isotope	11.2191	15.5477	3.35689	3.71025	4	4	0.3263	0.0366		*	*	*	*	*	*	*	*		11.2191	15.5477	3.35689	3.71025	4	4	0.3263	0.0366
Millett et al. 2012	52	380	580	200	4	*	*	UK	FACE	g plant-1	Monoculture	Fig. 4a	*	No	Forest	A. glutinosa	Isotope	7.24382	7.95053	3.18021	2.82686	4	4	0.0931	0.0798		*	*	*	*	*	*	*	*		7.24382	7.95053	3.18021	2.82686	4	4	0.0931	0.0798
Norby 1987	53	350	700	350	0.230137	*	*	USA	GC	mmole C2H4 plant-1 h-1	No	Table 1	*	No	Forest	E. angustifolia	C2H2	0.19	0.25	0.019	0.025	10	10	0.2744	0.002		0.19	0.25	0.019	0.025	10	10	0.2744	0.002		*	*	*	*	*	*	*	*
Norby 1987	54	350	700	350	0.268493	*	*	USA	GC	mmole C2H4 plant-1 h-1	No	Table 1	*	No	Forest	A. glutinosa	C2H2	0.13	1.46	0.013	0.146	10	10	2.4187	0.002		0.13	1.46	0.013	0.146	10	10	2.4187	0.002		*	*	*	*	*	*	*	*
Norby 1987	55	350	700	350	0.287671	*	*	USA	GC	mmole C2H4 plant-1 h-1	No	Table 1	*	No	Forest	R. pseudoacacia	C2H2	0.54	2	0.054	0.2	10	10	1.3093	0.002		0.54	2	0.054	0.2	10	10	1.3093	0.002		*	*	*	*	*	*	*	*
Olszyk et al. 2001	56	*	*	280	1.41667	*	*	*	GC	n noles C2H4 g-1 h-1	No	Fig. 7	*	No	Forest	Pine	C2H2	0.060239	0.0658167	0.0134058	0.0174752	2	3	0.0889	0.0484		0.060239	0.0658167	0.0134058	0.0174752	2	3	0.0889	0.0484		*	*	*	*	*	*	*	*
Olszyk et al. 2001	57	*	*	280	1.41667	*	*	*	GC	n noles C2H4 g-1 h-1	O3	Fig. 7	*	No	Forest	Pine	C2H2	0.0501992	0.0460159	0.0128456	0.00122201	3	3	-0.0874	0.0219		0.0501992	0.0460159	0.0128456	0.00122201	3	3	-0.0874	0.0219		*	*	*	*	*	*	*	*
Polley et al. 1997	58	385	690	305	1.08333	*	*	*	GC	mg cm-3	No	Table 4 (nodule mass * fixation per nodule mass	*	No	Forest	A. smallii	Isotope	0.028416	0.082752	0.0028416	0.0082752	3	3	1.07	0.0066		0.028416	0.082752	0.0028416	0.0082752	3	3	1.07	0.0066		*	*	*	*	*	*	*	*
Polley et al. 1997	59	385	980	595	1.08333	*	*	*	GC	mg cm-3	No	Table 4 (nodule mass * fixation per nodule mass	*	No	Forest	A. smallii	Isotope	0.028416	0.112216	0.0028416	0.0112216	3	3	1.3739	0.0066		0.028416	0.112216	0.0028416	0.0112216	3	3	1.3739	0.0066		*	*	*	*	*	*	*	*
Schortemeyer et al. 2002	60	350	700	350	0.405479	*	*	Australian	GC	mmoles N d-1	No	Table 2 (final dry weight) * Table 4 (NMR) * Table 5 (SNA)	*	No	Grassland	A. aneura	Accumulation	0.0078584	0.0163466	0.0002538	0.0004512	9	9	0.7243	0.0003		0.0078584	0.0163466	0.0002538	0.0004512	9	9	0.7243	0.0003		*	*	*	*	*	*	*	*
Schortemeyer et al. 2002	61	350	700	350	0.405479	*	*	Australian	GC	mmoles N d-1	No	Table 2 (final dry weight) * Table 4 (NMR) * Table 5 (SNA)	*	No	Grassland	A. tetragonophylla	Accumulation	0.0744	0.07502	0.00288	0.012705	9	9	0.008	0.0034		0.0744	0.07502	0.00288	0.012705	9	9	0.008	0.0034		*	*	*	*	*	*	*	*
Schortemeyer et al. 2002	62	350	700	350	0.405479	*	*	Australian	GC	mmoles N d-1	No	Table 2 (final dry weight) * Table 4 (NMR) * Table 5 (SNA)	*	No	Grassland	A. irrorata	Accumulation	0.18696	0.28665	0.00738	0.002268	9	9	0.4273	0.0002		0.18696	0.28665	0.00738	0.002268	9	9	0.4273	0.0002		*	*	*	*	*	*	*	*
Schortemeyer et al. 2002	63	350	700	350	0.405479	*	*	Australian	GC	mmoles N d-1	No	Table 2 (final dry weight) * Table 4 (NMR) * Table 5 (SNA)	*	No	Grassland	A. dealbata	Accumulation	1.2204	2.76556	0.05292	0.06528	9	9	0.8181	0.0003		1.2204	2.76556	0.05292	0.06528	9	9	0.8181	0.0003		*	*	*	*	*	*	*	*
Schortemeyer et al. 2002	64	350	700	350	0.405479	*	*	Australian	GC	mmoles N d-1	No	Table 2 (final dry weight) * Table 4 (NMR) * Table 5 (SNA)	*	No	Grassland	A. mearnsii	Accumulation	0.994708	0.946864	0.02574	0.029016	9	9	-0.0492	0.0002		0.994708	0.946864	0.02574	0.029016	9	9	-0.0492	0.0002		*	*	*	*	*	*	*	*
Schortemeyer et al. 2002	65	350	700	350	0.405479	*	*	Australian	GC	mmoles N d-1	No	Table 2 (final dry weight) * Table 4 (NMR) * Table 5 (SNA)	*	No	Grassland	A. implexa	Accumulation	0.56889	1.21211	0.037926	0.035784	9	9	0.7564	0.0006		0.56889	1.21211	0.037926	0.035784	9	9	0.7564	0.0006		*	*	*	*	*	*	*	*
Schortemeyer et al. 2002	66	350	700	350	0.405479	*	*	Australian	GC	mmoles N d-1	No	Table 2 (final dry weight) * Table 4 (NMR) * Table 5 (SNA)	*	No	Grassland	A. melanoxylon	Accumulation	0.683298	2.19307	0.019602	0.04536	9	9	1.1661	0.0001		0.683298	2.19307	0.019602	0.04536	9	9	1.1661	0.0001		*	*	*	*	*	*	*	*
Serraj & Sinclair 2003	67	360	700	340	0.0273973	*	*	USA	GC	mmole plant-1 h-1	No	Table 1 (ARA)	*	No	Cropland	Soybean	C2H2	28.6	38.8	7.8	6.4	4	4	0.305	0.0254		28.6	38.8	7.8	6.4	4	4	0.305	0.0254		*	*	*	*	*	*	*	*
Serraj & Sinclair 2003	68	360	700	340	0.0273973	*	*	USA	GC	mmole plant-1 h-1	ureide (5 mM)	Table 1 (ARA)	*	No	Cropland	Soybean	C2H2	15.9	23	4.4	11.8	4	4	0.3692	0.0849		15.9	23	4.4	11.8	4	4	0.3692	0.0849		*	*	*	*	*	*	*	*
Serraj & Sinclair 2003	69	360	700	340	0.0273973	*	*	USA	GC	mmole plant-1 h-1	ureide (10 mM)	Table 1 (ARA)	*	No	Cropland	Soybean	C2H2	8.4	17	5.4	5.4	4	4	0.705	0.1285		8.4	17	5.4	5.4	4	4	0.705	0.1285		*	*	*	*	*	*	*	*
Temperton et al. 2003	70	350	700	350	1	56°12' N	36°0' W	Scotland	OTC	mol h-1	No	Fig.3	*	No	Forest	Sitka spruce forest	C2H2	43.0461	73.3467	52.4248	82.2445	4	4	0.5329	0.6851		43.0461	73.3467	52.4248	82.2445	4	4	0.5329	0.6851		*	*	*	*	*	*	*	*
Thomas et al. 2000	71	350	700	350	0.273973	9°51‘ N	84°14’W	Costa Rica	GC	mmole C2H4 plant-1 h-1	No	Fig. 3b * Fig. 2	*	No	Forest	Gliricidia sepium	Isotope	92.9077	83.2003	21.9361	11.8617	5	5	-0.1104	0.0152		92.9077	83.2003	21.9361	11.8617	5	5	-0.1104	0.0152		*	*	*	*	*	*	*	*
Thomas et al. 2000	72	350	700	350	0.273973	9°51‘ N	84°14’W	Costa Rica	GC	mmole C2H4 plant-1 h-1	Low Nitrogen	Fig. 3b * Fig. 2	NH4NO3 (1 Mm)	Yes	Forest	Gliricidia sepium	Isotope	83.3385	99.6635	28.7095	32.6766	5	5	0.1789	0.0452		83.3385	99.6635	28.7095	32.6766	5	5	0.1789	0.0452		*	*	*	*	*	*	*	*
Thomas et al. 2000	73	350	700	350	0.273973	9°51‘ N	84°14’W	Costa Rica	GC	mmole C2H4 plant-1 h-1	High Nitrogen	Fig. 3b * Fig. 2	NH4NO3 (10 Mm)	Yes	Forest	Gliricidia sepium	Isotope	9.01643	50.2552	3.54954	9.77166	5	5	1.7181	0.0386		9.01643	50.2552	3.54954	9.77166	5	5	1.7181	0.0386		*	*	*	*	*	*	*	*
Tobita et al. 2010	74	360	720	360	2	43° N	141°E	Japan	GC	mmole C2H4 plant-1 h-1	High P & wet	Fig. 2 * Fig. 1	*	No	Forest	Alnus hirsuta	C2H2	6.51584	11.0811	1.19704	0.125749	6	6	0.531	0.0056		6.51584	11.0811	1.19704	0.125749	6	6	0.531	0.0056		*	*	*	*	*	*	*	*
Tobita et al. 2010	75	360	720	360	2	43° N	141°E	Japan	GC	mmole C2H4 plant-1 h-1	High P & dry	Fig. 2 * Fig. 1	*	No	Forest	Alnus hirsuta	C2H2	5.58536	7.90662	0.15235	0.261171	6	6	0.3475	0.0003		5.58536	7.90662	0.15235	0.261171	6	6	0.3475	0.0003		*	*	*	*	*	*	*	*
Tobita et al. 2010	76	360	720	360	2	43° N	141°E	Japan	GC	mmole C2H4 plant-1 h-1	Low P & wet	Fig. 2 * Fig. 1	*	No	Forest	Alnus hirsuta	C2H2	2.32299	1.23209	0.266612	0.0870571	6	6	-0.6341	0.003		2.32299	1.23209	0.266612	0.0870571	6	6	-0.6341	0.003		*	*	*	*	*	*	*	*
Tobita et al. 2010	77	360	720	360	2	43° N	141°E	Japan	GC	mmole C2H4 plant-1 h-1	Low P & dry	Fig. 2 * Fig. 1	*	No	Forest	Alnus hirsuta	C2H2	1.34611	3.43957	0.0634792	0.253917	6	6	0.9381	0.0013		1.34611	3.43957	0.0634792	0.253917	6	6	0.9381	0.0013		*	*	*	*	*	*	*	*
Tobita et al. 2010	78	360	720	360	2	43° N	141°E	Japan	GC	mmole C2H4 plant-1 h-1	High P & wet	Fig. 2 * Fig. 1	*	No	Forest	Alnus maximowiczii	C2H2	11.5712	15.9696	0.925738	1.39654	6	6	0.3222	0.0023		11.5712	15.9696	0.925738	1.39654	6	6	0.3222	0.0023		*	*	*	*	*	*	*	*
Tobita et al. 2010	79	360	720	360	2	43° N	141°E	Japan	GC	mmole C2H4 plant-1 h-1	High P & dry	Fig. 2 * Fig. 1	*	No	Forest	Alnus maximowiczii	C2H2	8.64706	8.96956	0.338556	0.329739	6	6	0.0366	0.0005		8.64706	8.96956	0.338556	0.329739	6	6	0.0366	0.0005		*	*	*	*	*	*	*	*
Tobita et al. 2010	80	360	720	360	2	43° N	141°E	Japan	GC	mmole C2H4 plant-1 h-1	Low P & wet	Fig. 2 * Fig. 1	*	No	Forest	Alnus maximowiczii	C2H2	2.58505	2.2028	0.238047	0.141065	6	6	-0.16	0.0021		2.58505	2.2028	0.238047	0.141065	6	6	-0.16	0.0021		*	*	*	*	*	*	*	*
Tobita et al. 2010	81	360	720	360	2	43° N	141°E	Japan	GC	mmole C2H4 plant-1 h-1	Low P & dry	Fig. 2 * Fig. 1	*	No	Forest	Alnus maximowiczii	C2H2	1.55204	1.43974	0.296236	0.105799	6	6	-0.0751	0.007		1.55204	1.43974	0.296236	0.105799	6	6	-0.0751	0.007		*	*	*	*	*	*	*	*
West et al. 2005	82	370	560	190	4	45° N	93° W	USA	FACE	g N m-2 y-1	Nitrogen	Fig. 2, persoNitrogenasel communication	*	Yes	Grassland	*	Isotope	8.3434	8.525	0.8772	0.8302	2	2	0.0215	0.0103		*	*	*	*	*	*	*	*		8.3434	8.525	0.8772	0.8302	2	2	0.0215	0.0103
West et al. 2005	83	370	560	190	4	45° N	93° W	USA	FACE	g N m-2 y-1	No	Fig. 2, persoNitrogenasel communication	*	No	Grassland	*	Isotope	0.6163	0.5907	0.0749	0.0791	2	2	-0.0424	0.0164		*	*	*	*	*	*	*	*		0.6163	0.5907	0.0749	0.0791	2	2	-0.0424	0.0164
Zanetti et al. 1996	84	350	600	250	3	47°27'N	8°41'E	Switzerland	FACE	g N m-2	Low Nitrogen	Table I	17 g N m-2	Yes	Cropland	White clover	Isotope	25.4	32.2333	2.54	3.22333	3	3	0.2383	0.0067		25.4	32.2333	2.54	3.22333	3	3	0.2383	0.0067		*	*	*	*	*	*	*	*
Zanetti et al. 1996	85	350	600	250	3	47°27'N	8°41'E	Switzerland	FACE	g N m-2	High Nitrogen	Table I	51.3 g N m-2	Yes	Cropland	White clover	Isotope	14.7	19.2	1.47	1.92	3	3	0.2671	0.0067		14.7	19.2	1.47	1.92	3	3	0.2671	0.0067		*	*	*	*	*	*	*	*
Zanetti et al. 1996	86	350	600	250	3	47°27'N	8°41'E	Switzerland	FACE	g N m-2	Low Nitrogen	Table I	17 g N m-2	Yes	Cropland	White clover & ryegrass	Isotope	19.1	27.4667	1.91	2.74667	3	3	0.3633	0.0067		19.1	27.4667	1.91	2.74667	3	3	0.3633	0.0067		*	*	*	*	*	*	*	*
Zanetti et al. 1996	87	350	600	250	3	47°27'N	8°41'E	Switzerland	FACE	g N m-2	High Nitrogen	Table I	51.3 g N m-2	Yes	Cropland	White clover & ryegrass	Isotope	7.36667	13.7	0.736667	1.37	3	3	0.6204	0.0067		7.36667	13.7	0.736667	1.37	3	3	0.6204	0.0067		*	*	*	*	*	*	*	*

## Sheet: Mineralization
																	Total									Short-term									Long-term
Reference	Obs	Ambient CO2 (ppm)	Elevated CO2 (ppm)	CO2 difference (ppm)	Treatment duration (years)	Latitude	Longitude	Country	Fercility	Unit	Other treatments	Data location	Notes	Nitrogen addition	Ecosystem	Vegetation	Mean_a	Mean_e	Std_a	Std_e	N_a	N_e	lnR	Var(lnR)		Mean_a	Mean_e	Std_a	Std_e	N_a	N_e	lnR	Var(lnR)		Mean_a	Mean_e	Std_a	Std_e	N_a	N_e	lnR	Var(lnR)
Allen et al. 2000	1	365	560	195	2	35°58' N	79°5' W	USA	FACE	mg N kg-1 soil 30days-1	No	Fig. 6	*	No	Forest	loblolly pine	2.67801	2.62304	1.24782	1.68814	3	3	-0.0208	0.2104		2.67801	2.62304	1.24782	1.68814	3	3	-0.0208	0.2104		*	*	*	*	*	*	*	*
Arnone 1997	2	335	680	345	2	46°34N	8°25E	Switzerland	OTC	mg N g-1 soil d-1	No	From Zak et al. 2000 (New Phytologist; Table 6)	*	No	Grassland	sedge	12.8	11	1.28	1.1	12	12	-0.1515	0.0017		12.8	11	1.28	1.1	12	12	-0.1515	0.0017		*	*	*	*	*	*	*	*
Berntson & Bazzaz 1997	3	375	700	325	2	*	*	USA	GC	mg N g-1 soil d-1	No	From Zak et al. 2000 (New Phytologist; Table 6)	*	No	Forest	Yellow birch	0.15	0.35	0.015	0.035	6	6	0.8473	0.0033		0.15	0.35	0.015	0.035	6	6	0.8473	0.0033		*	*	*	*	*	*	*	*
Berntson & Bazzaz 1998	4	375	700	325	2	*	*	USA	GC	mg N g-1 soil d-1	No	From Zak et al. 2000 (New Phytologist; Table 6)	*	No	Forest	Yellow birch & White birch	7.3	3.3	0.73	0.33	3	3	-0.794	0.0067		7.3	3.3	0.73	0.33	3	3	-0.794	0.0067		*	*	*	*	*	*	*	*
Billes et al. 1993	5	350	700	350	0.0767123	*	*	*	GC	mg N g-1 soil d-1	Fertillizer without N	From Zak et al. 2000 (New Phytologist; Table 6)	*	No	Cropland	Wheat	0.95	1.44	0.095	0.144	4	4	0.4159	0.005		0.95	1.44	0.095	0.144	4	4	0.4159	0.005		*	*	*	*	*	*	*	*
Billes et al. 1993	6	350	700	350	0.0767123	*	*	*	GC	mg N g-1 soil d-1	Fertillizer witht N	From Zak et al. 2000 (New Phytologist; Table 6)	50 kg N ha-1; from Zak et al. 2000 (New Phytologist; Table 6)	Yes	Cropland	Wheat	1.24	1.69	0.124	0.169	4	4	0.3096	0.005		1.24	1.69	0.124	0.169	4	4	0.3096	0.005		*	*	*	*	*	*	*	*
Billings et al. 2004	7	350	550	200	5	36°49'N	115°55'W	USA	FACE	μg g-1	No	Fig.5	*	No	Desert	Shrubland; average of cover types	69.9706	72.9914	12.0673	16.4655	3	3	0.0423	0.0269		*	*	*	*	*	*	*	*		69.9706	72.9914	12.0673	16.4655	3	3	0.0423	0.0269
Blank & Derner 2004	8	360	699	339	0.25	31°05'N	97°20W	USA	GC	mmol N kg-1 soil	Planted	Table 6	High fertility soil	No	Grassland	*	1.72	1.65	0.8	0.68	12	12	-0.0415	0.0322		1.72	1.65	0.8	0.68	12	12	-0.0415	0.0322		*	*	*	*	*	*	*	*
Blank & Derner 2004	9	360	699	339	0.25	31°05'N	97°20W	USA	GC	mmol N kg-1 soil	Unplanted	Table 6	High fertility soil	No	Grassland	*	1.21	1.28	0.83	0.32	6	6	0.0562	0.0888		1.21	1.28	0.83	0.32	6	6	0.0562	0.0888		*	*	*	*	*	*	*	*
Blank & Derner 2004	10	360	699	339	0.25	31°05'N	97°20W	USA	GC	mmol N kg-1 soil	Planted	Table 6	Low fertility soil	No	Grassland	*	0.13	0.05	0.08	0.08	12	12	-0.9555	0.2449		0.13	0.05	0.08	0.08	12	12	-0.9555	0.2449		*	*	*	*	*	*	*	*
Blank & Derner 2004	11	360	699	339	0.25	31°05'N	97°20W	USA	GC	mmol N kg-1 soil	Unplanted	Table 6	Low fertility soil	No	Grassland	*	0.01	0.07	0.06	0.08	6	6	1.9459	6.2177		0.01	0.07	0.06	0.08	6	6	1.9459	6.2177		*	*	*	*	*	*	*	*
Calfapietra et al. 2007	12	370	550	180	3	42°37'N	11°51'E	Italy	FACE	μg N g-1 month-1	No	Fig. 5	*	No	Forest	Average across vegetation cover	23.4314	11.9608	10.6959	4.24947	3	3	-0.6724	0.1115		23.4314	11.9608	10.6959	4.24947	3	3	-0.6724	0.1115		*	*	*	*	*	*	*	*
Carnol et al. 2002	13	350	750	400	4	*	*	Germany	OTC	μg N 48 h-1 g-1 dry soil	No	Fig. 1	Incubation under CO2; sum of upper and lower layers	No	Forest	Coniferous	17.8571	36.0989	8.35815	6.40764	5	5	0.7039	0.0501		*	*	*	*	*	*	*	*		17.8571	36.0989	8.35815	6.40764	5	5	0.7039	0.0501
Carnol et al. 2002	14	350	750	400	4	*	*	Germany	OTC	μg N 48 h-1 g-1 dry soil	No	Fig. 1	Incubation under normal; sum of upper and lower layers	No	Forest	Coniferous	21.1538	21.978	7.48544	6.38877	5	5	0.0382	0.0419		*	*	*	*	*	*	*	*		21.1538	21.978	7.48544	6.38877	5	5	0.0382	0.0419
Cheng et al. 2011	15	388	547	159	4	35°43' N	78°40' W	USA	OTC	mg N kg-1 soil	Nitrogen	Fig. 4; Sum across layers	*	Yes	Cropland	June	0.910482	1.00668	0.0561809	0.0549333	4	4	0.1004	0.0017		0.773168	0.805127	0.065111	0.06406	4	4	0.0404	0.0034		1.32243	1.61135	0.118839	0.11404	4	4	0.1977	0.0033
Cheng et al. 2011	16	388	547	159	4	35°43' N	78°40' W	USA	OTC	mg N kg-1 soil	Nitrogen + O3	Fig. 4; Sum across layers	*	Yes	Cropland	June	0.871251	0.979774	0.0494211	0.0833675	4	4	0.1174	0.0026		0.760538	0.826281	0.0635407	0.0655805	4	4	0.083	0.0033		1.20339	1.44025	0.0588959	0.284118	4	4	0.1797	0.0103
Cheng et al. 2001	17	374.5	683.5	309	0.306849	*	*	Japan	GC	Mg N Kg-1 soil	Fertilizer	Fig. 3; Sum across layers	*	Yes	Cropland	Rice	115.28	128.305	3.68186	3.42693	3	3	0.107	0.0006		115.28	128.305	3.68186	3.42693	3	3	0.107	0.0006		*	*	*	*	*	*	*	*
Dijkstra et al. 2005	18	372	560	188	4	45° N	93° W	USA	FACE	mg kg-1 d-1	Nitrogen	Fig. 3; using Qi's data	*	Yes	Grassland	Abandoned agricultural field	0.1568	0.1245	0.163342	0.150472	98	98	-0.2307	0.026		*	*	*	*	*	*	*	*		0.1568	0.1245	0.163342	0.150472	98	98	-0.2307	0.026
Drake et al. 2012	19	365	560	195	15	35°58' N	79°5' W	USA	FACE	mg N g-1 soil 28days-1	No	Fig. 3	*	No	Forest	*	2.71777	3.55401	2.09059	2.64808	4	4	0.2683	0.2867		*	*	*	*	*	*	*	*		2.71777	3.55401	2.09059	2.64808	4	4	0.2683	0.2867
Drake et al. 2012	20	365	560	195	15	35°58' N	79°5' W	USA	FACE	mg N g-1 soil 28days-1	Nitrogen	Fig. 3	*	Yes	Forest	*	8.01394	3.90244	1.67247	2.22997	4	4	-0.7196	0.0925		*	*	*	*	*	*	*	*		8.01394	3.90244	1.67247	2.22997	4	4	-0.7196	0.0925
Drake et al. 2012	21	365	560	195	15	35°58' N	79°5' W	USA	FACE	mg N g-1 soil 28days-1	Trench	Fig. 3	*	No	Forest	*	10.1045	7.1777	1.5331	5.71429	4	4	-0.342	0.1642		*	*	*	*	*	*	*	*		10.1045	7.1777	1.5331	5.71429	4	4	-0.342	0.1642
Drake et al. 2012	22	365	560	195	15	35°58' N	79°5' W	USA	FACE	mg N g-1 soil 28days-1	Nitrogen + Trench	Fig. 3	*	Yes	Forest	*	8.36237	5.43554	1.5331	0.836237	4	4	-0.4308	0.0143		*	*	*	*	*	*	*	*		8.36237	5.43554	1.5331	0.836237	4	4	-0.4308	0.0143
Finzi & Schlesinger 2003	23	365	560	195	5	35°58' N	79°5' W	USA	FACE	μg N g-1 dry soil	No	Fig. 1B	*	No	Forest	Pine	1.73419	2.04387	0.620632	0.805443	3	3	0.1643	0.0944		2.02581	2.8	0.796611	1.17826	3	3	0.3237	0.1106		1.29677	0.909677	1.08318	1.09965	3	3	-0.3545	0.7197
Gill et al. 2006	24	275	455	180	3.9	31°05' N	97°20' W	USA	GC	g N m-2 land d-1	No	Fig. 1d	*	No	Grassland	Grass	0.0384921	0.0212963	0.0173465	0.0170532	10	10	-0.592	0.0846		0.0346561	0.0256614	0.0235343	0.0205008	10	10	-0.3002	0.1095		0.042328	0.0169312	0.025894	0.0276229	10	10	-0.9175	0.3042
Gloser et al. 2000	25	350	600	250	5	47°27'N	8°41'E	Switzerland	FACE	mg kg-1 d-1	Nitrogen	Average across dates	Low N	Yes	Grassland	Lolium perenne	0.98	0.93	1.20125	1.20125	3	3	-0.0524	1.0569		*	*	*	*	*	*	*	*		0.98	0.93	1.20125	1.20125	3	3	-0.0524	1.0569
Gloser et al. 2000	26	350	600	250	5	47°27'N	8°41'E	Switzerland	FACE	mg kg-1 d-1	Nitrogen	Average across dates	High N	Yes	Grassland	Lolium perenne	1.505	1.67	1.20125	1.20125	3	3	0.104	0.3848		*	*	*	*	*	*	*	*		1.505	1.67	1.20125	1.20125	3	3	0.104	0.3848
Hungate et al. 1997 (Biogeochemestry)	27	360	710	350	1	37°24' N	122°13' W	USA	OTC	μg N d-1 g-1 dry soil	No	Fig.4	*	No	Grassland	*	1.05882	0.926471	0.648394	0.648394	6	6	-0.1335	0.1441		1.05882	0.926471	0.648394	0.648394	6	6	-0.1335	0.1441		*	*	*	*	*	*	*	*
Hungate et al. 1997 (Biogeochemestry)	28	360	710	350	1	37°24' N	122°13' W	USA	OTC	μg N d-1 g-1 dry soil	Fertilizer	Fig.4	*	Yes	Grassland	*	4.36765	4.63235	1.62099	1.62099	6	6	0.0589	0.0434		4.36765	4.63235	1.62099	1.62099	6	6	0.0589	0.0434		*	*	*	*	*	*	*	*
Iverson et al. 2012	29	396	565	169	12	35°54' N	84°20' W	USA	FACE	mg N m-3 day-1	No	Table 2	*	No	Forest	Liquidambar styraciflua L.	-62	-60	8.15475	15.7099	3	2	*	*		*	*	*	*	*	*	*	*		-62	-60	8.15475	15.7099	3	2	*	*
Johnson et al. 2004	30	350	542	192	2	35°54' N	84°20' W	USA	FACE	mg kg-1	No	Table 7	Average of the three measurements	No	Forest	*	6.51333	4.71333	2.5527	1.69673	3	2	-0.3235	0.116		6.51333	4.71333	2.5527	1.69673	3	2	-0.3235	0.116		*	*	*	*	*	*	*	*
Kampichler et al. 1998	31	*	*	200	1.125	*	*	*	GC	mg N g-1 soil 7d-1	No	Fig. 2d	Average across runs	No	Grassland	*	23.3491	23.2311	1.74084	1.92222	7	7	-0.0051	0.0018		23.3491	23.2311	1.74084	1.92222	7	7	-0.0051	0.0018		*	*	*	*	*	*	*	*
Langley et al. 2009	32	*	*	350	6	28°38' N	80°42' W	USA	OTC	μg N g-1 d-1	No	Fig. 1a	Sum across depths	No	Forest	Oaks	0.117105	0.252632	0.168585	0.163243	8	8	0.7688	0.3113		*	*	*	*	*	*	*	*		0.117105	0.252632	0.168585	0.163243	8	8	0.7688	0.3113
Larsen et al. 2011	33	350	510	160	2	55°53'N	11°58'E	Denmark	FACE	g N m-2 yr-1	No	Table 1	Sum across fauna	No	Heathland	*	4.993	6.075	1.8841	2.27219	6	6	0.1961	0.047		4.993	6.075	1.8841	2.27219	6	6	0.1961	0.047		*	*	*	*	*	*	*	*
Larsen et al. 2011	34	350	510	160	2	55°53'N	11°58'E	Denmark	FACE	g N m-2 yr-1	Drought	Table 1	Sum across fauna	No	Heathland	*	4.23	6.563	1.41346	2.56588	6	6	0.4392	0.0441		4.23	6.563	1.41346	2.56588	6	6	0.4392	0.0441		*	*	*	*	*	*	*	*
Larsen et al. 2011	35	350	510	160	2	55°53'N	11°58'E	Denmark	FACE	g N m-2 yr-1	Warming	Table 1	Sum across fauna	No	Heathland	*	4.859	5.442	3.12043	3.25498	6	6	0.1133	0.1284		4.859	5.442	3.12043	3.25498	6	6	0.1133	0.1284		*	*	*	*	*	*	*	*
Larsen et al. 2011	36	350	510	160	2	55°53'N	11°58'E	Denmark	FACE	g N m-2 yr-1	Warming + Drought	Table 1	Sum across fauna	No	Heathland	*	4.412	4.172	1.36132	1.24289	6	6	-0.0559	0.0307		4.412	4.172	1.36132	1.24289	6	6	-0.0559	0.0307		*	*	*	*	*	*	*	*
McKinley et al. 2009	37	*	*	350	11	28°38' N	80°42' W	USA	OTC	mg N g-1 soil	No	Fig. 1e-h; sum across layers in 2007	*	No	Forest	Evergreen	0.188404	0.263298	0.0823531	0.0752919	8	8	0.3347	0.0341		*	*	*	*	*	*	*	*		0.188404	0.263298	0.0823531	0.0752919	8	8	0.3347	0.0341
Mikan et al. 2000	38	367	715	348	2	45°34' N	84°40' W	USA	OTC	mg N g-1 soil d-1	Nitrogen	From Zak et al. 2000 (New Phytologist; Table 6)	20 mg N; Low-N soil	Yes	Forest	P. tremuloides	0.22	0.22	0.022	0.022	8	8	0	0.0025		0.22	0.22	0.022	0.022	8	8	0	0.0025		*	*	*	*	*	*	*	*
Mikan et al. 2000	39	367	715	348	2	45°34' N	84°40' W	USA	OTC	mg N g-1 soil d-1	Nitrogen	From Zak et al. 2000 (New Phytologist; Table 6)	20 mg N; High-N soil	Yes	Forest	P. tremuloides	0.32	0.5	0.032	0.05	8	8	0.4463	0.0025		0.32	0.5	0.032	0.05	8	8	0.4463	0.0025		*	*	*	*	*	*	*	*
Newton et al. 1995	40	350	700	350	2	*	*	*	GC	mg N g-1 soil d-1	No	Table 3; From Zak et al. 2000 (New Phytologist; Table 6)	*	No	Grassland	*	2.39	2.3	0.239	0.23	6	6	-0.0384	0.0033		2.39	2.3	0.239	0.23	6	6	-0.0384	0.0033		*	*	*	*	*	*	*	*
Niklaus et al. 2003	41	360	600	240	6	47°33' N	7°34' E	Switzerland	OTC	mg N g-1 soil d-1	No	Table 2	*	No	Grassland	*	11.1	13.2	2.44404	1.9893	8	8	0.1733	0.0089		*	*	*	*	*	*	*	*		11.1	13.2	2.44404	1.9893	8	8	0.1733	0.0089
Phillips et al. 2012	42	365	560	195	13	35°58' N	79°5' W	USA	FACE	mg N g-1 soil d-1	Nitrogen	Fig. 3a	5.6 g N m-2 yr-1; this is the average of 0 and 11.2	Yes	Forest	loblolly pine	0.105085	0.143644	0.0777013	0.0752474	6	6	0.3126	0.1369		*	*	*	*	*	*	*	*		0.105085	0.143644	0.0777013	0.0752474	6	6	0.3126	0.1369
Prior et al. 1997	43	370	550	180	2	33°10' N	112°0' W	USA	FACE	mg N g-1 soil d-1	Fertillizer	Table 2; From Zak et al. 2000 (New Phytologist; Table 6)	214 kg N ha-1	Yes	Cropland	Wheat	0.41	0.37	0.041	0.037	4	4	-0.1027	0.005		0.41	0.37	0.041	0.037	4	4	-0.1027	0.005		*	*	*	*	*	*	*	*
Reich & Hobbie 2013	44	368	560	192	12	45° N	93° W	USA	FACE	mg N kg-1 soil days-1	Biodiversity	Fig. S1b	*	No	Grassland	*	0.0734543	0.0651882	0.00367293	0.0043225	3	3	-0.1198	0.0023		0.0771505	0.0615591	0.0077562	0.00851561	3	3	-0.2257	0.0097		0.0727151	0.065914	0.00386964	0.00464311	3	3	-0.0982	0.0026
Reich & Hobbie 2013	45	368	560	192	12	45° N	93° W	USA	FACE	mg N kg-1 soil days-1	Biodiversity + Nitrogen	Fig. S1b	*	Yes	Grassland	*	0.0756048	0.0844758	0.00598934	0.00610229	3	3	0.1113	0.0038		0.102151	0.0747312	0.00989342	0.00956759	3	3	-0.3135	0.0086		0.0702957	0.0864247	0.00667289	0.00685468	3	3	0.2062	0.0052
Ross et al. 2013	46	*	475	*	10	40°14' S	173°16' E	New Zealand	FACE	mg N kg-1 soil 56days-1	Fertillizer without N	Fig. 6c	*	No	Grassland	*	97.6429	115.5	4.01615	4.32128	3	3	0.168	0.001		69.0476	69.7619	7.04396	8.93571	3	3	0.0103	0.0089		109.898	135.102	4.75827	4.76662	3	3	0.2065	0.001
Ross et al. 1995	47	350	700	350	0.60274	40°14' S	173°16' E	New Zealand	GC	mg N g-1 soil d-1	No	Fig. 3; From Zak et al. 2000 (New Phytologist; Table 6)	*	No	Grassland	*	3.71	3.86	0.371	0.386	6	6	0.0396	0.0033		3.71	3.86	0.371	0.386	6	6	0.0396	0.0033		*	*	*	*	*	*	*	*
Rutting et al. 2010	48	*	475	*	10	40°14' S	175°16' E	New Zealand	FACE	mg N g-1 soil d-1	No	Table 1	Average of Nrec and Nlab	No	Grassland	*	3.145	5.345	0.132061	0.230868	3	3	0.5303	0.0012		*	*	*	*	*	*	*	*		3.145	5.345	0.132061	0.230868	3	3	0.5303	0.0012
Tscherko et al. 2001	49	*	*	200	0.75	*	*	*	GC	mg kg-1	No	Table 4	Sum across layers	No	Grassland	*	67.8	30	6.78	3	6	6	-0.8154	0.0033		67.8	30	6.78	3	6	6	-0.8154	0.0033		*	*	*	*	*	*	*	*
Tscherko et al. 2001	50	*	*	200	0.75	*	*	*	GC	mg kg-1	Warming	Table 4	Sum across layers	No	Grassland	*	68.8	33.3	6.88	3.33	6	6	-0.7256	0.0033		68.8	33.3	6.88	3.33	6	6	-0.7256	0.0033		*	*	*	*	*	*	*	*
Zak et al. 2000a	51	367	715	348	2.5	45°34' N	84°40' W	USA	OTC	ng N g-1 soil d-1	Nitrogen	Fig. 4	20 mg N; Low-N soil	Yes	Forest	P. tremuloides	61.6438	65.7534	30.6991	41.6502	5	5	0.0645	0.1298		61.6438	65.7534	30.6991	41.6502	5	5	0.0645	0.1298		*	*	*	*	*	*	*	*
Zak et al. 2000a	52	367	715	348	2.5	45°34' N	84°40' W	USA	OTC	ng N g-1 soil d-1	Nitrogen	Fig. 4	20 mg N; High-N soil	Yes	Forest	P. tremuloides	271.233	316.438	118.405	57.7585	5	5	0.1542	0.0448		271.233	316.438	118.405	57.7585	5	5	0.1542	0.0448		*	*	*	*	*	*	*	*
Zak et al. 1993	53	342	692	350	0.416667	45°34' N	84°41' W	USA	OTC	ng N g-1 soil d-1	Nitrogen	Fig. 3	4.5 g N m-2; bulk soil	Yes	Forest	Populus grandidentata	455.556	2588.89	222.222	577.778	4	4	1.7375	0.0719		455.556	2588.89	222.222	577.778	4	4	1.7375	0.0719		*	*	*	*	*	*	*	*
Wood et al. 1994	54	370	550	180	3	33°10' N	112°0' W	USA	FACE	mg N kg-1 soil 60days-1	Nitrogen	Table 3; dry, sum across layers	130 kg N ha-1	Yes	Cropland	Cotton	52.3	55.9	24.0782	15.7823	4	4	0.0666	0.0729		52.3	55.9	24.0782	15.7823	4	4	0.0666	0.0729		*	*	*	*	*	*	*	*
Wood et al. 1994	55	370	550	180	3	33°10' N	112°0' W	USA	FACE	mg N kg-1 soil 60days-1	Nitrogen + Irrigation	Table 3; wet, sum across layers	130 kg N ha-1	Yes	Cropland	Cotton	57.8	62.8	35.5719	17.9343	4	4	0.083	0.1151		57.8	62.8	35.5719	17.9343	4	4	0.083	0.1151		*	*	*	*	*	*	*	*

## Sheet: Nitrification
																	Total									Short-term									Long-term
Reference	Obs	Ambient CO2 (ppm)	Elevated CO2 (ppm)	CO2 difference (ppm)	Treatment duration (years)	Latitude	Longitude	Country	Fercility	Unit	Other treatments	Data location	Notes	Nitrogen addition	Ecosystem	Vegetation	Mean_a	Mean_e	Std_a	Std_e	N_a	N_e	lnR	Var(lnR)		Mean_a	Mean_e	Std_a	Std_e	N_a	N_e	lnR	Var(lnR)		Mean_a	Mean_e	Std_a	Std_e	N_a	N_e	lnR	Var(lnR)
Baggs & Blum 2004	1	360	600	240	10	47°27'N	8°41'E	Switzerland	FACE	mg 15N kg-1 dry soil d-1	Low Nitrogen	Table1	*	Yes	Grassland	*	2.9	2	0.866025	0.34641	3	3	-0.3716	0.0397		*	*	*	*	*	*	*	*		2.9	2	0.866025	0.34641	3	3	-0.3716	0.0397
Baggs & Blum 2004	2	360	600	240	10	47°27'N	8°41'E	Switzerland	FACE	mg 15N kg-1 dry soil d-1	High Nitrogen	Table1	*	Yes	Grassland	*	12	9.3	3.63731	0.519615	3	3	-0.2549	0.0317		*	*	*	*	*	*	*	*		12	9.3	3.63731	0.519615	3	3	-0.2549	0.0317
Calfapietra et al. 2007	3	370	550	180	3	42°37'N	11°51'E	Italy	FACE	μg N g-1 month-1	No	Fig. 5	*	No	Forest	Average across vegetation cover	21.7625	11.8008	7.35902	3.60194	3	3	-0.612	0.0692		21.7625	11.8008	7.35902	3.60194	3	3	-0.612	0.0692		*	*	*	*	*	*	*	*
Drake et al. 2012	4	365	560	195	15	35°58' N	79°5' W	USA	FACE	mg N g-1 soil 28days-1	No	Fig. 3	*	No	Forest	*	1.95122	0.905923	2.09059	1.11498	4	4	-0.7673	0.6657		*	*	*	*	*	*	*	*		1.95122	0.905923	2.09059	1.11498	4	4	-0.7673	0.6657
Drake et al. 2012	5	365	560	195	15	35°58' N	79°5' W	USA	FACE	mg N g-1 soil 28days-1	Nitrogen	Fig. 3	*	Yes	Forest	*	9.82578	6.55052	1.95122	1.11498	4	4	-0.4055	0.0171		*	*	*	*	*	*	*	*		9.82578	6.55052	1.95122	1.11498	4	4	-0.4055	0.0171
Drake et al. 2012	6	365	560	195	15	35°58' N	79°5' W	USA	FACE	mg N g-1 soil 28days-1	Trench	Fig. 3	*	No	Forest	*	14.6341	11.2892	2.09059	6.41115	4	4	-0.2595	0.0857		*	*	*	*	*	*	*	*		14.6341	11.2892	2.09059	6.41115	4	4	-0.2595	0.0857
Drake et al. 2012	7	365	560	195	15	35°58' N	79°5' W	USA	FACE	mg N g-1 soil 28days-1	Nitrogen + Trench	Fig. 3	*	Yes	Forest	*	10.3136	8.50174	1.81185	1.5331	4	4	-0.1932	0.0158		*	*	*	*	*	*	*	*		10.3136	8.50174	1.81185	1.5331	4	4	-0.1932	0.0158
Gloser et al. 2000	8	350	600	250	5	47°27'N	8°41'E	Switzerland	FACE	mg kg-1 d-1	Nitrogen	Average	Low N	Yes	Grassland	Lolium perenne	0.47	0.315	1.01366	1.01366	3	3	-0.4002	5.0027		*	*	*	*	*	*	*	*		0.47	0.315	1.01366	1.01366	3	3	-0.4002	5.0027
Gloser et al. 2000	9	350	600	250	5	47°27'N	8°41'E	Switzerland	FACE	mg kg-1 d-1	Nitrogen	Average	High N	Yes	Grassland	Lolium perenne	1.51	1.63	1.01366	1.01366	3	3	0.0765	0.2791		*	*	*	*	*	*	*	*		1.51	1.63	1.01366	1.01366	3	3	0.0765	0.2791
Hungate et al. 1997 (Biogeochemestry)	10	360	710	350	1	37°24' N	122°13' W	USA	OTC	μg N d-1 g-1 dry soil	No	Fig.4	*	No	Grassland	*	0.441176	0.441176	0.324197	0.216131	6	6	0	0.13		0.441176	0.441176	0.324197	0.216131	6	6	0	0.13		*	*	*	*	*	*	*	*
Hungate et al. 1997 (Biogeochemestry)	11	360	710	350	1	37°24' N	122°13' W	USA	OTC	μg N d-1 g-1 dry soil	Fertilizer	Fig.4	*	Yes	Grassland	*	2.82353	1.58824	1.08066	0.864526	6	6	-0.5754	0.0738		2.82353	1.58824	1.08066	0.864526	6	6	-0.5754	0.0738		*	*	*	*	*	*	*	*
Iverson et al. 2012	12	396	565	169	12	35°54' N	84°20' W	USA	FACE	mg N m-3 day-1	No	Table 2	*	No	Forest	Liquidambar styraciflua L.	54.3333	-2.66667	22.8528	13.4114	3	2	*	*		*	*	*	*	*	*	*	*		54.3333	-2.66667	22.8528	13.4114	3	2	*	*
Kammann et al. 2008	13	*	*	*	6	50°32' N	8°41.3' E	Germany	FACE	mg N kg-1 d-1	Nitrogen	Table 4	*	Yes	Grassland	*	256.7	349.8	68.0696	175.976	3	3	0.3095	0.1078		*	*	*	*	*	*	*	*		256.7	349.8	68.0696	175.976	3	3	0.3095	0.1078
Kanerva et al. 2006	14	438	487	49	2.5	60°49' N	23°28' E	Finland	OTC	mg N g-1 h-1	Fertilizer	Table 4	*	Yes	Grassland	*	0.0173333	0.0176667	0.00204124	0.00155456	3	3	0.0229	0.0072		0.0173333	0.0176667	0.00204124	0.00155456	3	3	0.0229	0.0072		*	*	*	*	*	*	*	*
Kanerva et al. 2006	15	438	486	48	2.5	60°49' N	23°28' E	Finland	OTC	mg N g-1 h-1	Fertilizer + O3	Table 4	*	Yes	Grassland	*	0.0143333	0.017	0.00212132	0.00158114	3	3	0.173	0.0101		0.0143333	0.017	0.00212132	0.00158114	3	3	0.173	0.0101		*	*	*	*	*	*	*	*
Larsen et al. 2011	16	350	510	160	2	55°53'N	11°58'E	Denmark	FACE	g N m-2 yr-1	No	Table 1	*	No	Heathland	*	3.82	0.71	3.99267	1.59217	6	6	-1.6827	1.0202		3.82	0.71	3.99267	1.59217	6	6	-1.6827	1.0202		*	*	*	*	*	*	*	*
Larsen et al. 2011	17	350	510	160	2	55°53'N	11°58'E	Denmark	FACE	g N m-2 yr-1	Drought	Table 1	*	No	Heathland	*	3.37	4.44	4.11514	6.95655	6	6	0.2757	0.6577		3.37	4.44	4.11514	6.95655	6	6	0.2757	0.6577		*	*	*	*	*	*	*	*
Larsen et al. 2011	18	350	510	160	2	55°53'N	11°58'E	Denmark	FACE	g N m-2 yr-1	Warming	Table 1	*	No	Heathland	*	5.77	4.95	5.2909	4.801	6	6	-0.1533	0.2969		5.77	4.95	5.2909	4.801	6	6	-0.1533	0.2969		*	*	*	*	*	*	*	*
Larsen et al. 2011	19	350	510	160	2	55°53'N	11°58'E	Denmark	FACE	g N m-2 yr-1	Warming + Drought	Table 1	*	No	Heathland	*	11.37	3.38	9.23458	3.87019	6	6	-1.2131	0.3285		11.37	3.38	9.23458	3.87019	6	6	-1.2131	0.3285		*	*	*	*	*	*	*	*
Niboyet et al. 2010	20	318	645	327	0.208333	*	*	*	GC	ng N g-1 soil h-1	No	Fig. 2	*	No	Grassland	Dactylis glomerata	100	101.282	19.9852	22.2058	3	3	0.0127	0.0293		100	101.282	19.9852	22.2058	3	3	0.0127	0.0293		*	*	*	*	*	*	*	*
Niboyet et al. 2010	21	318	645	327	0.208333	*	*	*	GC	ng N g-1 soil h-1	Nitrogen	Fig. 2	10 g N m-2	Yes	Grassland	Dactylis glomerata	129.487	193.59	31.0881	35.5292	3	3	0.4022	0.0304		129.487	193.59	31.0881	35.5292	3	3	0.4022	0.0304		*	*	*	*	*	*	*	*
Perez-Lopez et al. 2013	22	350	700	350	0.0767123	*	*	Canada	GC	mg NO2- mg-1 protein h-1	Fertilizer; 0 NaCl	Fig. 2a	10.5 g N day-1 m-3	Yes	Cropland	Barley	0.883333	0.888889	0.108866	0.0816497	6	6	0.0063	0.0039		0.883333	0.888889	0.108866	0.0816497	6	6	0.0063	0.0039		*	*	*	*	*	*	*	*
Perez-Lopez et al. 2013	23	350	700	350	0.0767123	*	*	Canada	GC	mg NO2- mg-1 protein h-1	Fertilizer; 80 NaCl	Fig. 2a	10.5 g N day-1 m-3	Yes	Cropland	Barley	0.466667	0.722222	0.0952579	0.176908	6	6	0.4366	0.0169		0.466667	0.722222	0.0952579	0.176908	6	6	0.4366	0.0169		*	*	*	*	*	*	*	*
Perez-Lopez et al. 2013	24	350	700	350	0.0767123	*	*	Canada	GC	mg NO2- mg-1 protein h-1	Fertilizer; 160 NaCl	Fig. 2a	10.5 g N day-1 m-3	Yes	Cropland	Barley	0.383333	0.461111	0.0680414	0.204124	6	6	0.1848	0.0379		0.383333	0.461111	0.0680414	0.204124	6	6	0.1848	0.0379		*	*	*	*	*	*	*	*
Perez-Lopez et al. 2013	25	350	700	350	0.0767123	*	*	Canada	GC	mg NO2- mg-1 protein h-1	Fertilizer; 240 NaCl	Fig. 2a	10.5 g N day-1 m-3	Yes	Cropland	Barley	0.261111	0.361111	0.0680414	0.0952579	6	6	0.3243	0.0229		0.261111	0.361111	0.0680414	0.0952579	6	6	0.3243	0.0229		*	*	*	*	*	*	*	*
Pinay et al. 2007	26	350	700	350	2	43°38'N	3°52'E	France	GC	nM N g-1 soil h-1	No	Fig. 1	*	No	Grassland	*	0.335567	0.41134	0.214319	0.193908	8	8	0.2034	0.0788		0.335567	0.41134	0.214319	0.193908	8	8	0.2034	0.0788		*	*	*	*	*	*	*	*
Rakshit et al. 2012	27	370	650	280	0.328767	*	*	India	GC	mg NO2- kg-1 d-1	Fertillizer	Fig. 2	120 kg N ha-1; average of 0, 120 and 240	Yes	Cropland	Wheat	0.179443	0.12892	0.0179443	0.012892	3	3	-0.3306	0.0067		0.179443	0.12892	0.0179443	0.012892	3	3	-0.3306	0.0067		*	*	*	*	*	*	*	*
Rakshit et al. 2012	28	370	650	280	0.328767	*	*	India	GC	mg NO2- kg-1 d-1	Fertillizer + warming	Fig. 2	120 kg N ha-1; average of 0, 120 and 240	Yes	Cropland	Wheat	0.159408	0.169861	0.0159408	0.0169861	3	3	0.0638	0.0067		0.159408	0.169861	0.0159408	0.0169861	3	3	0.0638	0.0067		*	*	*	*	*	*	*	*
Zak et al. 2000a	29	367	715	348	2.5	45°34' N	84°40' W	USA	OTC	ng N g-1 soil d-1	Nitrogen	Fig. 6	20 mg N; Low-N soil	Yes	Forest	P. tremuloides	65.678	63.5593	22.3325	14.1243	5	5	-0.0328	0.033		65.678	63.5593	22.3325	14.1243	5	5	-0.0328	0.033		*	*	*	*	*	*	*	*
Zak et al. 2000a	30	367	715	348	2.5	45°34' N	84°40' W	USA	OTC	ng N g-1 soil d-1	Nitrogen	Fig. 6	20 mg N; High-N soil	Yes	Forest	P. tremuloides	292.373	330.508	55.965	22.3325	5	5	0.1226	0.0082		292.373	330.508	55.965	22.3325	5	5	0.1226	0.0082		*	*	*	*	*	*	*	*

## Sheet: Denitrification
																	Total									Short-term									Long-term
Reference	Obs	Ambient CO2 (ppm)	Elevated CO2 (ppm)	CO2 difference (ppm)	Treatment duration (years)	Latitude	Longitude	Country	Fercility	Unit	Other treatments	Data location	Notes	Nitrogen addition	Ecosystem	Vegetation	Mean_a	Mean_e	Std_a	Std_e	N_a	N_e	lnR	Var(lnR)		Mean_a	Mean_e	Std_a	Std_e	N_a	N_e	lnR	Var(lnR)		Mean_a	Mean_e	Std_a	Std_e	N_a	N_e	lnR	Var(lnR)
Carnol et al. 2002	1	350	750	400	4	*	*	Germany	OTC	μg N 48 h-1 g-1 dry soil	No	Table 2	Average of upper and lower soil layers	No	Forest	Coniferous	15.45	23.85	2.83823	2.92878	5	5	0.4342	0.0098		*	*	*	*	*	*	*	*		15.45	23.85	2.83823	2.92878	5	5	0.4342	0.0098
Hall et al. 1998	2	450	720	270	0.0383562	*	*	*	GC	ng N g-1 h-1	No	Fig. 2	Mesocosm; pH 4.3	No	Grassland	Ryegrass	167.219	102.206	16.7219	10.2206	5	5	-0.4923	0.004		167.219	102.206	16.7219	10.2206	5	5	-0.4923	0.004		*	*	*	*	*	*	*	*
Hall et al. 1998	3	450	720	270	0.0383562	*	*	*	GC	ng N g-1 h-1	No	Fig. 2	Mesocosm; pH 5.9	No	Grassland	Ryegrass	381.832	358.246	38.1832	35.8246	5	5	-0.0638	0.004		381.832	358.246	38.1832	35.8246	5	5	-0.0638	0.004		*	*	*	*	*	*	*	*
Hall et al. 1998	4	450	720	270	0.0383562	*	*	*	GC	ng N g-1 h-1	No	Fig. 2	Mesocosm; pH 7	No	Grassland	Ryegrass	867.669	1101.56	86.7669	110.156	5	5	0.2387	0.004		867.669	1101.56	86.7669	110.156	5	5	0.2387	0.004		*	*	*	*	*	*	*	*
Kanerva et al. 2006	5	438	487	49	2.5	60°49' N	23°28' E	Finland	OTC	mg N g-1 h-1	Fertilizer	Table 4	*	Yes	Grassland	*	0.618333	0.555	0.07255	0.0538029	3	3	-0.108	0.0077		0.618333	0.555	0.07255	0.0538029	3	3	-0.108	0.0077		*	*	*	*	*	*	*	*
Kanerva et al. 2006	6	438	486	48	2.5	60°49' N	23°28' E	Finland	OTC	mg N g-1 h-1	Fertilizer + O3	Table 4	*	Yes	Grassland	*	0.492	0.606	0.0467912	0.0335062	3	3	0.2084	0.004		0.492	0.606	0.0467912	0.0335062	3	3	0.2084	0.004		*	*	*	*	*	*	*	*
Larsen et al. 2011	7	350	510	160	2	55°53'N	11°58'E	Denmark	FACE	g N m-2 yr-1	No	Table 1	*	No	Heathland	*	19	17.8	14.207	11.2677	6	6	-0.0652	0.16		19	17.8	14.207	11.2677	6	6	-0.0652	0.16		*	*	*	*	*	*	*	*
Larsen et al. 2011	8	350	510	160	2	55°53'N	11°58'E	Denmark	FACE	g N m-2 yr-1	Drought	Table 1	*	No	Heathland	*	21.5	17.9	17.3914	16.1666	6	6	-0.1833	0.245		21.5	17.9	17.3914	16.1666	6	6	-0.1833	0.245		*	*	*	*	*	*	*	*
Larsen et al. 2011	9	350	510	160	2	55°53'N	11°58'E	Denmark	FACE	g N m-2 yr-1	Warming	Table 1	*	No	Heathland	*	29.9	18.7	30.1287	16.4116	6	6	-0.4693	0.2976		29.9	18.7	30.1287	16.4116	6	6	-0.4693	0.2976		*	*	*	*	*	*	*	*
Larsen et al. 2011	10	350	510	160	2	55°53'N	11°58'E	Denmark	FACE	g N m-2 yr-1	Warming + Drought	Table 1	*	No	Heathland	*	36.4	25.6	20.0858	17.6363	6	6	-0.352	0.1298		36.4	25.6	20.0858	17.6363	6	6	-0.352	0.1298		*	*	*	*	*	*	*	*
Niboyet et al. 2010	11	318	645	327	0.208333	*	*	*	GC	ng N g-1 soil h-1	No	Fig. 2	*	No	Grassland	Dactylis glomerata	25.3012	26.506	6.26042	2.08681	3	3	0.0465	0.0225		25.3012	26.506	6.26042	2.08681	3	3	0.0465	0.0225		*	*	*	*	*	*	*	*
Niboyet et al. 2010	12	318	645	327	0.208333	*	*	*	GC	ng N g-1 soil h-1	Nitrogen	Fig. 2	10 g N m-2	Yes	Grassland	Dactylis glomerata	80.7229	100	16.6945	20.8681	3	3	0.2141	0.0288		80.7229	100	16.6945	20.8681	3	3	0.2141	0.0288		*	*	*	*	*	*	*	*
Pinay et al. 2007	13	350	700	350	2	43°38'N	3°52'E	France	GC	nM N g-1 soil h-1	No	Fig. 1	*	No	Grassland	*	7.2	6.64615	1.56651	1.69706	8	8	-0.08	0.0141		7.2	6.64615	1.56651	1.69706	8	8	-0.08	0.0141		*	*	*	*	*	*	*	*
Smart et al. 1997	14	360	1000	640	0.0630137	*	*	*	GC	g m-2	Nitrogen (100 mM)	Fig. 1	*	Yes	Cropland	Wheat	0.0572034	0.225636	0.0330264	0.152542	3	4	1.3722	0.2252		0.0572034	0.225636	0.0330264	0.152542	3	4	1.3722	0.2252		*	*	*	*	*	*	*	*
Smart et al. 1997	15	360	1000	640	0.0630137	*	*	*	GC	g m-2	Nitrogen (1000 mM)	Fig. 1	*	Yes	Cropland	Wheat	0.0476695	0.927966	0.0220176	0.775424	3	4	2.9681	0.2454		0.0476695	0.927966	0.0220176	0.775424	3	4	2.9681	0.2454		*	*	*	*	*	*	*	*

## Sheet: N2O emission
																	Total									Short-term									Long-term
Reference	Obs	Ambient CO2 (ppm)	Elevated CO2 (ppm)	CO2 difference (ppm)	Treatment duration (years)	Latitude	Longitude	Country	Fercility	Unit	Other treatments	Data location	Notes	Nitrogen addition	Ecosystem	Vegetation	Mean_a	Mean_e	Std_a	Std_e	N_a	N_e	lnR	Var(lnR)		Mean_a	Mean_e	Std_a	Std_e	N_a	N_e	lnR	Var(lnR)		Mean_a	Mean_e	Std_a	Std_e	N_a	N_e	lnR	Var(lnR)
Ambus & Robertson 1999	1	*	2A	A	2	45°34' N	84°40' W	USA	OTC	mg N m-2 h-1	No	Figure 4; "High" N soil is locally excavated topsoil	*	No	Forest	Broadleaved	1.55805	3.05618	0.669983	2.00995	5	5	0.6737	0.1235		1.55805	3.05618	0.669983	2.00995	5	5	0.6737	0.1235		*	*	*	*	*	*	*	*
Ambus & Robertson 1999	2	*	2A	A	2	45°34' N	84°40' W	USA	OTC	mg N m-2 h-1	Nitrogen	Figure 4; "High" N soil is locally excavated topsoil	*	Yes	Forest	Broadleaved	11.6854	9.16854	5.76185	6.29784	5	5	-0.2426	0.143		11.6854	9.16854	5.76185	6.29784	5	5	-0.2426	0.143		*	*	*	*	*	*	*	*
Arnone & Bohlen 1998	3	350	600	250	2	*	*	Switzerland	GC	μg m-2 h-1	Phosphate	Fig.1; average of pre- and post-harvest	*	No	Grassland	*	25.0467	48.2243	7.18939	17.5597	12	12	0.6551	0.0179		25.0467	48.2243	7.18939	17.5597	12	12	0.6551	0.0179		*	*	*	*	*	*	*	*
Baggs & Blum 2004	4	360	600	240	10	47°27'N	8°41'E	Switzerland	FACE	mg N2O-N m-2 land	Low Nitrogen	Table1	2.8 g N m-2	Yes	Grassland	*	412	521	259.808	351.606	3	3	0.2347	0.2844		*	*	*	*	*	*	*	*		412	521	259.808	351.606	3	3	0.2347	0.2844
Baggs & Blum 2004	5	360	600	240	10	47°27'N	8°41'E	Switzerland	FACE	mg N2O-N m-2 land	High Nitrogen	Table1	11.2 g N m-2	Yes	Grassland	*	3726	5422	869.49	1110.24	3	3	0.3751	0.0321		*	*	*	*	*	*	*	*		3726	5422	869.49	1110.24	3	3	0.3751	0.0321
Baggs et al. 2003	6	360	600	240	8	47°27'N	8°41'E	Switzerland	FACE	mg N2O-N m-2 land year-1	Low Nitrogen	Table1; Lolium	14 g N m-2 y-1	Yes	Grassland	Lolium	446	330	275.396	214.774	3	3	-0.3012	0.2683		*	*	*	*	*	*	*	*		446	330	275.396	214.774	3	3	-0.3012	0.2683
Baggs et al. 2003	7	360	600	240	8	47°27'N	8°41'E	Switzerland	FACE	mg N2O-N m-2 land year-1	Low Nitrogen	Table1; Lolium/Trifolium	14 g N m-2 y-1	Yes	Grassland	Lolium/Trifolium	436	343	353.338	377.587	3	3	-0.2399	0.6229		*	*	*	*	*	*	*	*		436	343	353.338	377.587	3	3	-0.2399	0.6229
Baggs et al. 2003	8	360	600	240	8	47°27'N	8°41'E	Switzerland	FACE	mg N2O-N m-2 land year-1	Low Nitrogen	Table1; Trifolium	14 g N m-2 y-1	Yes	Grassland	Trifolium	531	501	268.468	237.291	3	3	-0.0582	0.16		*	*	*	*	*	*	*	*		531	501	268.468	237.291	3	3	-0.0582	0.16
Baggs et al. 2003	9	360	600	240	8	47°27'N	8°41'E	Switzerland	FACE	mg N2O-N m-2 land year-1	High Nitrogen	Table1; Lolium	56 g N m-2 y-1	Yes	Grassland	Lolium	591	959	453.797	446.869	3	3	0.4841	0.2689		*	*	*	*	*	*	*	*		591	959	453.797	446.869	3	3	0.4841	0.2689
Baggs et al. 2003	10	360	600	240	8	47°27'N	8°41'E	Switzerland	FACE	mg N2O-N m-2 land year-1	High Nitrogen	Table1; Lolium/Trifolium	56 g N m-2 y-1	Yes	Grassland	Lolium/Trifolium	576	805	275.396	405.3	3	3	0.3347	0.1607		*	*	*	*	*	*	*	*		576	805	275.396	405.3	3	3	0.3347	0.1607
Baggs et al. 2003	11	360	600	240	8	47°27'N	8°41'E	Switzerland	FACE	mg N2O-N m-2 land year-1	High Nitrogen	Table1; Trifolium	56 g N m-2 y-1	Yes	Grassland	Trifolium	908	921	387.979	646.055	3	3	0.0142	0.2249		*	*	*	*	*	*	*	*		908	921	387.979	646.055	3	3	0.0142	0.2249
Billings et al. 2002	12	350	550	200	3	36°49'N	115°55'W	USA	FACE	μg m-2 land d-1	No	Table2; Average across species	*	No	Desert	Shrubland	26.5	29.5	13.6831	18.6949	3	3	0.1072	0.2227		26.5	29.5	13.6831	18.6949	3	3	0.1072	0.2227		*	*	*	*	*	*	*	*
Cantarel et al. 2011	13	400	600	200	3.5	45°43' S	3°01' E	French	FACE	kg N ha-1 yr-1	Drought	Fig. 3; from van Groenigen et al. 2011	*	No	Grassland	*	0.892614	0.865428	0.395136	0.309017	5	5	-0.0309	0.0647		*	*	*	*	*	*	*	*		0.892614	0.865428	0.395136	0.309017	5	5	-0.0309	0.0647
Carnol et al. 2002	14	350	750	400	4	*	*	Germany	OTC	μg N 48 h-1 g-1 dry soil	No	Table 2	Average of upper and lower soil layers	No	Forest	Coniferous	7.9	11	2.10026	1.93793	5	5	0.331	0.0203		*	*	*	*	*	*	*	*		7.9	11	2.10026	1.93793	5	5	0.331	0.0203
Cheng et al. 2006	15	414.5	743	328.5	0.364384	*	*	Japan	GC	mg N pot-1	Fertilizer	Table2	National Institute for Agro-Environmental Sciences, Tsukuba, Japan	Yes	Cropland	Rice	14.85	13.85	1.14018	1.17388	3	3	-0.0697	0.0044		14.85	13.85	1.14018	1.17388	3	3	-0.0697	0.0044		*	*	*	*	*	*	*	*
Decock et al. 2012	16	*	550	*	8	40°03' N	88°12' W	USA	FACE	ng g-1 soil 28d-1	Nitrogen + 40% WFPS	Fig. 2	*	Yes	Cropland	Corn-soybean	99.6337	101.978	56.8204	37.5757	4	4	0.0233	0.1153		*	*	*	*	*	*	*	*		99.6337	101.978	56.8204	37.5757	4	4	0.0233	0.1153
Decock et al. 2012	17	*	550	*	8	40°03' N	88°12' W	USA	FACE	ng g-1 soil 28d-1	Nitrogen + 65% WFPS	Fig. 2	*	Yes	Cropland	Corn-soybean	260.22	235.604	180.294	110.349	4	4	-0.0994	0.1749		*	*	*	*	*	*	*	*		260.22	235.604	180.294	110.349	4	4	-0.0994	0.1749
Decock et al. 2012	18	*	550	*	8	40°03' N	88°12' W	USA	FACE	ng g-1 soil 28d-1	Nitrogen + 90% WFPS	Fig. 2	*	Yes	Cropland	Corn-soybean	452.454	433.7	114.39	114.449	4	4	-0.0423	0.0334		*	*	*	*	*	*	*	*		452.454	433.7	114.39	114.449	4	4	-0.0423	0.0334
Decock et al. 2012	19	*	550	*	8	40°03' N	88°12' W	USA	FACE	ng g-1 soil 28d-1	Nitrogen + O3 + 40% WFPS	Fig. 2	*	Yes	Cropland	Corn-soybean	110.183	65.641	56.1437	23.4219	4	4	-0.5179	0.0967		*	*	*	*	*	*	*	*		110.183	65.641	56.1437	23.4219	4	4	-0.5179	0.0967
Decock et al. 2012	20	*	550	*	8	40°03' N	88°12' W	USA	FACE	ng g-1 soil 28d-1	Nitrogen + O3 + 65% WFPS	Fig. 2	*	Yes	Cropland	Corn-soybean	321.172	235.604	130.889	130.545	4	4	-0.3098	0.1183		*	*	*	*	*	*	*	*		321.172	235.604	130.889	130.545	4	4	-0.3098	0.1183
Decock et al. 2012	21	*	550	*	8	40°03' N	88°12' W	USA	FACE	ng g-1 soil 28d-1	Nitrogen + O3 + 90% WFPS	Fig. 2	*	Yes	Cropland	Corn-soybean	745.495	568.498	133.171	163.404	4	4	-0.271	0.0286		*	*	*	*	*	*	*	*		745.495	568.498	133.171	163.404	4	4	-0.271	0.0286
Dijkstra et al. 2010 (PS)	22	400	780	380	0.23	*	*	USA	GC	kg N ha-1 yr-1	No	Fig. 5; from van Groenigen et al. 2011	*	No	Grassland	Artemisia frigida	0.0515774	0.0642184	0.00920106	0.0249412	4	4	0.2192	0.0457		0.0515774	0.0642184	0.00920106	0.0249412	4	4	0.2192	0.0457		*	*	*	*	*	*	*	*
Dijkstra et al. 2010 (PS)	23	400	780	380	0.23	*	*	USA	GC	kg N ha-1 yr-1	No	Fig. 5; from van Groenigen et al. 2011	*	No	Grassland	Bouteloua gracilis	0.064743	0.0535211	0.0129373	0.00951144	4	4	-0.1903	0.0179		0.064743	0.0535211	0.0129373	0.00951144	4	4	-0.1903	0.0179		*	*	*	*	*	*	*	*
Dijkstra et al. 2010 (PS)	24	400	780	380	0.23	*	*	USA	GC	kg N ha-1 yr-1	No	Fig. 5; from van Groenigen et al. 2011	*	No	Grassland	Linaria dalmatica	0.0490207	0.0427246	0.0175952	0.0152489	4	4	-0.1375	0.0641		0.0490207	0.0427246	0.0175952	0.0152489	4	4	-0.1375	0.0641		*	*	*	*	*	*	*	*
Dijkstra et al. 2010 (PS)	25	400	780	380	0.23	*	*	USA	GC	kg N ha-1 yr-1	No	Fig. 5; from van Groenigen et al. 2011	*	No	Grassland	Pascopyrum smithii	0.0605092	0.0664185	0.00764296	0.0246862	4	4	0.0932	0.0385		0.0605092	0.0664185	0.00764296	0.0246862	4	4	0.0932	0.0385		*	*	*	*	*	*	*	*
Dijkstra et al. 2010 (PS)	26	400	780	380	0.23	*	*	USA	GC	kg N ha-1 yr-1	No	Fig. 5; from van Groenigen et al. 2011	*	No	Grassland	Hesperostipa comata	0.127248	0.110617	0.067844	0.0247369	4	4	-0.1401	0.0836		0.127248	0.110617	0.067844	0.0247369	4	4	-0.1401	0.0836		*	*	*	*	*	*	*	*
Dijkstra et al. 2010 (PS)	27	400	780	380	0.23	*	*	USA	GC	kg N ha-1 yr-1	No	Fig. 5; from van Groenigen et al. 2011	*	No	Grassland	All 5 species combined	0.0503518	0.0796393	0.0246322	0.0117503	4	4	0.4585	0.0653		0.0503518	0.0796393	0.0246322	0.0117503	4	4	0.4585	0.0653		*	*	*	*	*	*	*	*
Dijkstra et al. 2010 (PS)	28	400	780	380	0.23	*	*	USA	GC	kg N ha-1 yr-1	Water	Fig. 5; from van Groenigen et al. 2011	*	No	Grassland	Artemisia frigida	0.0730148	0.0940694	0.0183843	0.0215097	4	4	0.2534	0.0289		0.0730148	0.0940694	0.0183843	0.0215097	4	4	0.2534	0.0289		*	*	*	*	*	*	*	*
Dijkstra et al. 2010 (PS)	29	400	780	380	0.23	*	*	USA	GC	kg N ha-1 yr-1	Water	Fig. 5; from van Groenigen et al. 2011	*	No	Grassland	Bouteloua gracilis	0.103312	0.107864	0.0683468	0.0221054	4	4	0.0431	0.1199		0.103312	0.107864	0.0683468	0.0221054	4	4	0.0431	0.1199		*	*	*	*	*	*	*	*
Dijkstra et al. 2010 (PS)	30	400	780	380	0.23	*	*	USA	GC	kg N ha-1 yr-1	Water	Fig. 5; from van Groenigen et al. 2011	*	No	Grassland	Linaria dalmatica	0.0589324	0.049092	0.00820709	0.0262135	4	4	-0.1827	0.0761		0.0589324	0.049092	0.00820709	0.0262135	4	4	-0.1827	0.0761		*	*	*	*	*	*	*	*
Dijkstra et al. 2010 (PS)	31	400	780	380	0.23	*	*	USA	GC	kg N ha-1 yr-1	Water	Fig. 5; from van Groenigen et al. 2011	*	No	Grassland	Pascopyrum smithii	0.0973627	0.060966	0.0472966	0.0204217	4	4	-0.4681	0.087		0.0973627	0.060966	0.0472966	0.0204217	4	4	-0.4681	0.087		*	*	*	*	*	*	*	*
Dijkstra et al. 2010 (PS)	32	400	780	380	0.23	*	*	USA	GC	kg N ha-1 yr-1	Water	Fig. 5; from van Groenigen et al. 2011	*	No	Grassland	Hesperostipa comata	0.300868	0.31553	0.111294	0.148625	4	4	0.0476	0.0897		0.300868	0.31553	0.111294	0.148625	4	4	0.0476	0.0897		*	*	*	*	*	*	*	*
Dijkstra et al. 2010 (PS)	33	400	780	380	0.23	*	*	USA	GC	kg N ha-1 yr-1	Water	Fig. 5; from van Groenigen et al. 2011	*	No	Grassland	All 5 species combined	0.0605499	0.056759	0.0150568	0.0185099	4	4	-0.0647	0.042		0.0605499	0.056759	0.0150568	0.0185099	4	4	-0.0647	0.042		*	*	*	*	*	*	*	*
Hagedorn et al. 2000	34	370	570	200	4	*	*	Switzerland	OTC	g m-2	Low Nitrogen	Table 3	Acidic loam	Yes	Forest	*	0.008	0.009	0.0008	0.0009	4	4	0.1178	0.005		*	*	*	*	*	*	*	*		0.008	0.009	0.0008	0.0009	4	4	0.1178	0.005
Hagedorn et al. 2000	35	370	570	200	4	*	*	Switzerland	OTC	g m-2	Low Nitrogen	Table 3	Calcareous sand	Yes	Forest	*	0.014	0.015	0.0014	0.0015	4	4	0.069	0.005		*	*	*	*	*	*	*	*		0.014	0.015	0.0014	0.0015	4	4	0.069	0.005
Hagedorn et al. 2000	36	370	570	200	4	*	*	Switzerland	OTC	g m-2	High Nitrogen	Table 3	Acidic loam	Yes	Forest	*	0.009	0.01	0.0009	0.001	4	4	0.1054	0.005		*	*	*	*	*	*	*	*		0.009	0.01	0.0009	0.001	4	4	0.1054	0.005
Hagedorn et al. 2000	37	370	570	200	4	*	*	Switzerland	OTC	g m-2	High Nitrogen	Table 3	Calcareous sand	Yes	Forest	*	0.026	0.021	0.0026	0.0021	4	4	-0.2136	0.005		*	*	*	*	*	*	*	*		0.026	0.021	0.0026	0.0021	4	4	-0.2136	0.005
Hall et al. 1998	38	450	720	270	0.0383562	*	*	*	GC	ng N g-1 h-1	No	Fig. 3	Mesocosm; pH 4.3	No	Grassland	Ryegrass	642.634	205.566	64.2634	20.5566	5	5	-1.1398	0.004		642.634	205.566	64.2634	20.5566	5	5	-1.1398	0.004		*	*	*	*	*	*	*	*
Hall et al. 1998	39	450	720	270	0.0383562	*	*	*	GC	ng N g-1 h-1	No	Fig. 3	Mesocosm; pH 5.9	No	Grassland	Ryegrass	2313.37	1462.21	231.337	146.221	5	5	-0.4588	0.004		2313.37	1462.21	231.337	146.221	5	5	-0.4588	0.004		*	*	*	*	*	*	*	*
Hall et al. 1998	40	450	720	270	0.0383562	*	*	*	GC	ng N g-1 h-1	No	Fig. 3	Mesocosm; pH 7	No	Grassland	Ryegrass	3017.18	4534.18	301.718	453.418	5	5	0.4073	0.004		3017.18	4534.18	301.718	453.418	5	5	0.4073	0.004		*	*	*	*	*	*	*	*
Ineson et al. 1998	41	350	600	250	3	47°27'N	8°41'E	Switzerland	FACE	mg N m-2 hr-1	Nitrogen + Water	Fig.1	*	Yes	Grassland	*	32	43	16	20	4	4	0.2955	0.1166		32	43	16	20	4	4	0.2955	0.1166		*	*	*	*	*	*	*	*
Kammann et al. 2008	42	*	*	*	9	50°32' N	8°41.3' E	Germany	FACE	mg N kg-1 d-1	Nitrogen	Table 3	*	Yes	Grassland	*	7.8	17.9	0.866025	11.9512	3	3	0.8307	0.1527		*	*	*	*	*	*	*	*		7.8	17.9	0.866025	11.9512	3	3	0.8307	0.1527
Kettunen et al. 2005	43	360	720	360	0.333333	*	*	*	GC	mg m-2 h-1	Fertilizer	Fig. 5; Average across measurement periods	2g N m-2	Yes	Grassland	*	187.5	211.851	555.612	365.862	6	6	0.1221	1.9606		187.5	211.851	555.612	365.862	6	6	0.1221	1.9606		*	*	*	*	*	*	*	*
Kettunen et al. 2005	44	360	720	360	0.333333	*	*	*	GC	mg m-2 h-1	Fertilizer	Fig. 5; Average across measurement periods	6g N m-2	Yes	Grassland	*	228.084	209.416	469.052	255.443	6	6	-0.0854	0.9528		228.084	209.416	469.052	255.443	6	6	-0.0854	0.9528		*	*	*	*	*	*	*	*
Kettunen et al. 2005	45	360	720	360	0.333333	*	*	*	GC	mg m-2 h-1	Fertilizer	Fig. 5; Average across measurement periods	10g N m-2	Yes	Grassland	*	187.5	164.773	255.299	211.214	6	6	-0.1292	0.5828		187.5	164.773	255.299	211.214	6	6	-0.1292	0.5828		*	*	*	*	*	*	*	*
Kettunen et al. 2007	46	360	720	360	0.383562	*	*	*	GC	mg m-2 h-1	Fertilizer	Fig. 2	5g N m-2	Yes	Grassland	*	370.072	354.839	3464.3	3502.89	9	9	-0.042	20.5648		370.072	354.839	3464.3	3502.89	9	9	-0.042	20.5648		*	*	*	*	*	*	*	*
Kettunen et al. 2007	47	360	720	360	0.383562	*	*	*	GC	mg m-2 h-1	Fertilizer	Fig. 2	10g N m-2	Yes	Grassland	*	466.964	200	5936.28	3074.18	9	9	-0.8479	44.208		466.964	200	5936.28	3074.18	9	9	-0.8479	44.208		*	*	*	*	*	*	*	*
Lam et al. 2011	48	420	565	145	0.666667	40°10' N	116°14' E	China	FACE	mg m-2 h-1	Nitrogen	Table 1	136 kg N ha-1 (average of 84 and 188)	Yes	Cropland	Wheat	24	38.4	2.4	3.84	36	36	0.47	0.0006		24	38.4	2.4	3.84	36	36	0.47	0.0006		*	*	*	*	*	*	*	*
Lam et al. 2013 (JAS)	49	390	550	160	0.333333	36°42' S	142°07' E	Australia	FACE	mg kg-1 soil	Nitrogen	Table 2	100 kg N ha-1 yr-1	Yes	Cropland	Wheat	28	53	17.2	29.2	4	4	0.6381	0.1702		28	53	17.2	29.2	4	4	0.6381	0.1702		*	*	*	*	*	*	*	*
Lam et al. 2013 (JAS)	50	390	550	160	0.333333	36°42' S	142°07' E	Australia	FACE	mg kg-1 soil	Nitrogen + Irrigation	Table 2	100 kg N ha-1 yr-1	Yes	Cropland	Wheat	16	37	7.6	19.6	4	4	0.8383	0.1266		16	37	7.6	19.6	4	4	0.8383	0.1266		*	*	*	*	*	*	*	*
Larsen et al. 2011	51	350	510	160	2	55°53'N	11°58'E	Denmark	FACE	g N m-2 yr-1	No	Table 1	*	No	Heathland	*	0.031	0.024	0.0146969	0.0269444	6	6	-0.2559	0.2469		0.031	0.024	0.0146969	0.0269444	6	6	-0.2559	0.2469		*	*	*	*	*	*	*	*
Larsen et al. 2011	52	350	510	160	2	55°53'N	11°58'E	Denmark	FACE	g N m-2 yr-1	Drought	Table 1	*	No	Heathland	*	0.028	0.03	0.0195959	0.0146969	6	6	0.069	0.1217		0.028	0.03	0.0195959	0.0146969	6	6	0.069	0.1217		*	*	*	*	*	*	*	*
Larsen et al. 2011	53	350	510	160	2	55°53'N	11°58'E	Denmark	FACE	g N m-2 yr-1	Warming	Table 1	*	No	Heathland	*	0.016	0.051	0.0122474	0.0171464	6	6	1.1592	0.1156		0.016	0.051	0.0122474	0.0171464	6	6	1.1592	0.1156		*	*	*	*	*	*	*	*
Larsen et al. 2011	54	350	510	160	2	55°53'N	11°58'E	Denmark	FACE	g N m-2 yr-1	Warming + Drought	Table 1	*	No	Heathland	*	0.033	0.033	0.0146969	0.0146969	6	6	0	0.0661		0.033	0.033	0.0146969	0.0146969	6	6	0	0.0661		*	*	*	*	*	*	*	*
Martin-Olmedo et al. 2002	55	396	716	320	0.0684932	*	*	*	GC	mg g-1 soil h-1	Low Nitrogen	Fig. 5	*	Yes	Cropland	Barley	0.143	0.182	0.0948314	0.181417	17	17	0.2412	0.0843		0.143	0.182	0.0948314	0.181417	17	17	0.2412	0.0843		*	*	*	*	*	*	*	*
Martin-Olmedo et al. 2002	56	396	716	320	0.0684932	*	*	*	GC	mg g-1 soil h-1	High Nitrogen	Fig. 5	*	Yes	Cropland	Barley	0.467	0.338	0.659697	0.379326	17	17	-0.3233	0.1915		0.467	0.338	0.659697	0.379326	17	17	-0.3233	0.1915		*	*	*	*	*	*	*	*
Mosier et al. 2002	57	370	720	350	4	40°50' N	104°42' W	USA	OTC	mg m-2 h-1	No	Table 2	*	No	Grassland	*	1.7	1.7	0.17	0.17	3	3	0	0.0067		*	*	*	*	*	*	*	*		1.7	1.7	0.17	0.17	3	3	0	0.0067
Niboyet et al. 2011	58	380	680	300	7.5	37°24' N	122°14' W	USA	FACE	kg N ha-1 yr-1	burned	From van Groenigen et al. 2011	*	No	Grassland	*	0.266541	0.228131	0.136169	0.154955	4	4	-0.1556	0.1807		*	*	*	*	*	*	*	*		0.266541	0.228131	0.136169	0.154955	4	4	-0.1556	0.1807
Niboyet et al. 2011	59	380	680	300	7.5	37°24' N	122°14' W	USA	FACE	kg N ha-1 yr-1	burned+H2O	From van Groenigen et al. 2011	*	No	Grassland	*	0.20918	0.254046	0.23456	0.204659	4	4	0.194	0.4768		*	*	*	*	*	*	*	*		0.20918	0.254046	0.23456	0.204659	4	4	0.194	0.4768
Niboyet et al. 2011	60	380	680	300	7.5	37°24' N	122°14' W	USA	FACE	kg N ha-1 yr-1	burned+N	From van Groenigen et al. 2011	*	Yes	Grassland	*	0.342584	0.834903	0.230865	0.877972	4	4	0.8907	0.39		*	*	*	*	*	*	*	*		0.342584	0.834903	0.230865	0.877972	4	4	0.8907	0.39
Niboyet et al. 2011	61	380	680	300	7.5	37°24' N	122°14' W	USA	FACE	kg N ha-1 yr-1	burned+N+H2O	From van Groenigen et al. 2011	*	Yes	Grassland	*	0.410256	0.483061	0.219537	0.631204	4	4	0.1633	0.4983		*	*	*	*	*	*	*	*		0.410256	0.483061	0.219537	0.631204	4	4	0.1633	0.4983
Niboyet et al. 2011	62	380	680	300	7.5	37°24' N	122°14' W	USA	FACE	kg N ha-1 yr-1	No	From van Groenigen et al. 2011	*	No	Grassland	*	0.135495	0.0948531	0.118462	0.0812759	6	6	-0.3561	0.2498		*	*	*	*	*	*	*	*		0.135495	0.0948531	0.118462	0.0812759	6	6	-0.3561	0.2498
Niboyet et al. 2011	63	380	680	300	7.5	37°24' N	122°14' W	USA	FACE	kg N ha-1 yr-1	+H2O	From van Groenigen et al. 2011	*	No	Grassland	*	0.100817	0.147942	0.103616	0.0781941	6	6	0.3834	0.2226		*	*	*	*	*	*	*	*		0.100817	0.147942	0.103616	0.0781941	6	6	0.3834	0.2226
Niboyet et al. 2011	64	380	680	300	7.5	37°24' N	122°14' W	USA	FACE	kg N ha-1 yr-1	+N	From van Groenigen et al. 2011	*	Yes	Grassland	*	0.101166	0.107578	0.116391	0.0556417	6	6	0.0613	0.265		*	*	*	*	*	*	*	*		0.101166	0.107578	0.116391	0.0556417	6	6	0.0613	0.265
Niboyet et al. 2011	65	380	680	300	7.5	37°24' N	122°14' W	USA	FACE	kg N ha-1 yr-1	+N+H2O	From van Groenigen et al. 2011	*	Yes	Grassland	*	0.0963843	0.159451	0.0754383	0.125012	6	6	0.5035	0.2043		*	*	*	*	*	*	*	*		0.0963843	0.159451	0.0754383	0.125012	6	6	0.5035	0.2043
Niboyet et al. 2011	66	380	680	300	7.5	37°24' N	122°14' W	USA	FACE	kg N ha-1 yr-1	+heating	From van Groenigen et al. 2011	*	No	Grassland	*	0.113031	0.207924	0.0472018	0.220186	6	6	0.6097	0.216		*	*	*	*	*	*	*	*		0.113031	0.207924	0.0472018	0.220186	6	6	0.6097	0.216
Niboyet et al. 2011	67	380	680	300	7.5	37°24' N	122°14' W	USA	FACE	kg N ha-1 yr-1	+H2O+heating	From van Groenigen et al. 2011	*	No	Grassland	*	0.0549772	0.0946245	0.0408481	0.0958028	6	6	0.5423	0.2626		*	*	*	*	*	*	*	*		0.0549772	0.0946245	0.0408481	0.0958028	6	6	0.5423	0.2626
Niboyet et al. 2011	68	380	680	300	7.5	37°24' N	122°14' W	USA	FACE	kg N ha-1 yr-1	+N+heating	From van Groenigen et al. 2011	*	Yes	Grassland	*	0.189556	0.138868	0.192091	0.185981	6	6	-0.3112	0.47		*	*	*	*	*	*	*	*		0.189556	0.138868	0.192091	0.185981	6	6	-0.3112	0.47
Niboyet et al. 2011	69	380	680	300	7.5	37°24' N	122°14' W	USA	FACE	kg N ha-1 yr-1	+H2O+N+heating	From van Groenigen et al. 2011	*	Yes	Grassland	*	0.204334	0.172703	0.0481186	0.0983258	6	6	-0.168	0.0632		*	*	*	*	*	*	*	*		0.204334	0.172703	0.0481186	0.0983258	6	6	-0.168	0.0632
Phillips et al. 2001	70	365	560	195	3	35°58'N	79°05' W	USA	FACE	kg N ha-1 yr-1	No	Page 749 left column; average of 1998 and 1999	*	No	Forest	Loblolly pine	0.062	0.069	0.0275396	0.026154	3	3	0.107	0.1137		0.062	0.069	0.0275396	0.026154	3	3	0.107	0.1137		*	*	*	*	*	*	*	*
Pleijel et al. 1998	71	350	700	350	0.15	57°54' N	12°24' E	Sweden	OTC	kg N ha-1 yr-1	Fertillizer	Fig. 2; from van Groenigen et al. 2011	110 kg ha-1	Yes	Cropland	Wheat	0.0547581	0.0463519	0.0248022	0.0143101	3	3	-0.1664	0.0999		0.0547581	0.0463519	0.0248022	0.0143101	3	3	-0.1664	0.0999		*	*	*	*	*	*	*	*
Rutting et al. 2010	72	*	475	*	10	40°14' S	175°16' E	New Zealand	FACE	kg N ha-1 yr-1	No	Fig. 4; from van Groenigen et al. 2011	*	No	Grassland	*	2.04487	2.19923	0.396817	0.280767	3	3	0.0727	0.018		*	*	*	*	*	*	*	*		2.04487	2.19923	0.396817	0.280767	3	3	0.0727	0.018
Smart et al. 1997	73	360	1000	640	0.0630137	*	*	*	GC	g m-2	Nitrogen (100 mM)	Table 1 (N lost)	*	Yes	Cropland	Wheat	6.13	9.51	1.22976	4.86	3	4	0.4391	0.0787		6.13	9.51	1.22976	4.86	3	4	0.4391	0.0787		*	*	*	*	*	*	*	*
Smart et al. 1997	74	360	1000	640	0.0630137	*	*	*	GC	g m-2	Nitrogen (1000 mM)	Table 1 (N lost)	*	Yes	Cropland	Wheat	6.96	10.88	1.05655	2.38	3	4	0.4467	0.0196		6.96	10.88	1.05655	2.38	3	4	0.4467	0.0196		*	*	*	*	*	*	*	*
Smith et al. 2010	75	375	683	308	10	32.6° N	85.5° W	USA	OTC	kg N ha-1 yr-1	Nitrogen	From van Groenigen et al. 2011	Coventional system; 135 kg N ha-1	Yes	Cropland	Sorghum & Soybean	0.392774	0.522405	0.13475	0.2125	3	3	0.2852	0.0944		*	*	*	*	*	*	*	*		0.392774	0.522405	0.13475	0.2125	3	3	0.2852	0.0944
Smith et al. 2010	76	375	683	308	10	32.6° N	85.5° W	USA	OTC	kg N ha-1 yr-1	Nitrogen	From van Groenigen et al. 2011	Conservation system; 135.4 kg N ha-1	Yes	Cropland	Clover, sorghum, sunn hemp, wheat, soybean	0.189929	1.25999	0.0405	1.7574	3	3	1.8922	0.6636		*	*	*	*	*	*	*	*		0.189929	1.25999	0.0405	1.7574	3	3	1.8922	0.6636
Welzmiller et al. 2008	77	370	550	180	1.25	33°04' N	111°58' W	USA	FACE	kg N ha-1 yr-1	Fertillier	Table 2; from van Groenigen et al. 2011	93 kg N ha-1; averaged total over 2 growing seasons	Yes	Cropland	Sorghum	0.5805	0.94425	0.2668	0.2118	4	4	0.4866	0.0654		0.5805	0.94425	0.2668	0.2118	4	4	0.4866	0.0654		*	*	*	*	*	*	*	*
Welzmiller et al. 2008	78	370	550	180	1.25	33°04' N	111°58' W	USA	FACE	kg N ha-1 yr-1	Fertillizer + Irrigation	Table 2; from van Groenigen et al. 2011	93 kg N ha-1; averaged total over 2 growing seasons	Yes	Cropland	Sorghum	0.3108	0.27135	0.1	0.2473	4	4	-0.1356	0.2335		0.3108	0.27135	0.1	0.2473	4	4	-0.1356	0.2335		*	*	*	*	*	*	*	*

[truncated: 5 more sheets: Leaching, Inorganic N, NH4 to NO3 ratio, Nodule mass, Nodule number]
