# Supplementary material for: Processes regulating progressive nitrogen limitation under elevated carbon dioxide: a meta-analysis
Source: Copernicus journal article supplement (doi:10.5194/bg-13-2689-2016), 2016-05-10
Supplement: Supplementary file 2 [file bg-13-2689-2016-supplement.zip]

Archive with 3 entries (3 files):
- Supporting_Information_00.pdf
- Database S1.xlsx
- bg-13-2689-2016-supplement-title-page.pdf
