# Supplementary material for: Processes regulating progressive nitrogen limitation under elevated carbon dioxide: a meta-analysis
Source: Copernicus journal article supplement (doi:10.5194/bg-13-2689-2016), 2016-05-10
Supplement: Supplementary file 2 [file bg-13-2689-2016-supplement.zip › bg-13-2689-2016-supplement-title-page.pdf]

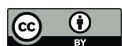

## *Supplement of*

# **Processes regulating progressive nitrogen limitation under elevated carbon dioxide: a meta-analysis**

**Junyi Liang et al.**

*Correspondence to:* Junyi Liang (jliangjn@gmail.com) and Yiqi Luo (yluo@ou.edu)

- bg-13-2689-2016-supplement-title-page.pdf
- Database S1.xlsx
- Supporting\_Information\_00.pdf

The copyright of individual parts of the supplement might differ from the CC-BY 3.0 licence.
